# Supplementary material for: Substrate-dependent regiodivergence in [3 + 2] annulation reactions of 2-(phenacylethylidene)cyclobutanones with thioureas
Source: Royal Society of Chemistry journal article supplement (doi:10.1039/d4ob01103a), 2024-01-01
Supplement: d4ob01103a1.pdf [file d4ob01103a1.pdf]

# Substrate-dependent regiodivergence in [3+2] annulation reactions of 2-(phenacylethylidene)cyclobutanones with thioureas

Stefano Barranco,<sup>a</sup> Alessio Pagnanini,<sup>a</sup> Federico Cuccu,<sup>a</sup> Pierluigi Caboni,<sup>b</sup> Régis Guillot,<sup>c</sup> David J. Aitken<sup>c</sup> and Angelo Frongia <sup>\*a</sup>

<sup>a</sup>Dipartimento di Scienze Chimiche e Geologiche, Università degli Studi di Cagliari, Complesso Universitario di Monserrato, S.S. 554, Bivio per Sestu, I-09042, Monserrato, Cagliari, Italy.  
[afrongia@unica.it](mailto:afrongia@unica.it)

<sup>b</sup>Dipartimento di Scienze della Vita e dell'Ambiente, Università degli Studi di Cagliari, Complesso Universitario di Monserrato-Blocco A, S.S. 554, Bivio per Sestu, I-09042, Monserrato, Cagliari, Italy.

<sup>c</sup>Université Paris-Saclay, CNRS, ICMMO, 17 Avenue des Sciences, 91400 Orsay, France.

## Table of Contents

|                                                             |      |
|-------------------------------------------------------------|------|
| 1. General methods and analytical data                      | S-2  |
| 2. Large scale synthesis of <b>5a</b>                       | S-17 |
| 3. Copies of <sup>1</sup> H and <sup>13</sup> C NMR spectra | S-18 |
| 4. X-Ray crystallographic studies                           | S-55 |

## General Methods

$^1\text{H}$  NMR spectra were recorded on a 600 MHz spectrometer at ambient temperature with  $\text{CDCl}_3$  or  $\text{DMSO-}d_6$  as solvent. Data are reported as follows: chemical shifts ( $\delta$ ), multiplicity, coupling constants and integration.  $^{13}\text{C}$  NMR spectra were recorded on the same instrument at 151 MHz with  $\text{CDCl}_3$  or  $\text{DMSO-}d_6$  as solvent.  $^{19}\text{F}$  NMR spectra were recorded on a 600 MHz spectrometer at 565 MHz. Routine infrared spectra were recorded on an FT-IR spectrophotometer in ATR mode; samples were neat (for liquids) or nujol mulls (for solids). High resolution mass spectrometry (HRMS) was performed using electrospray ionization (ESI) and a Q-TOF mass analyzer. Analytical thin layer chromatography was performed using 0.25 mm silica gel 60-F plates. Flash chromatography was performed using columns of 230–400 mesh silica gel 60 (0.040–0.063 mm).

### General procedure for the preparation of 3a-l

A solution of **1** (0.1 g, 1.12 mmol) and phosphonium ylide **2** (1.12 mmol) in  $\text{CH}_2\text{Cl}_2$  (5 mL) was stirred at reflux for 1 h. After the mixture was cooled to 0 °C, Dess-Martin periodinane (0.474 g, 1.12 mmol) was added and the reaction mixture was stirred at 0 °C for 2 h. The precipitate was filtered then the mixture was quenched with sat. aq.  $\text{NaHCO}_3$  solution and extracted twice with  $\text{CH}_2\text{Cl}_2$ . The combined organic layers were dried over  $\text{Na}_2\text{SO}_4$ , filtered, and concentrated under reduced pressure. The crude residue was purified by flash column chromatography (eluent: petroleum ether/ether = 10:1  $\rightarrow$  1:1) to give compound **3**. Yields refer to chromatographically purified materials.

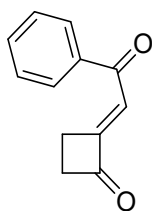

**(3a)** Yield 38% (79 mg); yellow solid; m. p. = 90 °C. IR (ATR)  $\nu$  2929, 2591, 2360, 2314, 2075, 1986, 1754, 1655, 1586, 1486, 1442, 1385, 1323, 1225, 1178, 1084, 870  $\text{cm}^{-1}$ .  $^1\text{H}$  NMR (600 MHz,  $\text{CDCl}_3$ )  $\delta$  7.97 – 7.96 (m, 2H), 7.62 – 7.59 (m, 1H), 7.52 – 7.49 (m, 2H), 7.29 – 7.28 (m, 1H), 3.23 – 3.20 (m, 2H), 3.18 – 3.13 (m, 2H).  $^{13}\text{C}$  NMR

(151 MHz, CDCl<sub>3</sub>)  $\delta$  200.2, 190.7, 161.5, 137.8, 133.8, 129.0, 128.5, 116.0, 46.9, 25.0.  
HRMS (ESI) Calcd. for C<sub>12</sub>H<sub>11</sub>O<sub>2</sub> (M+H<sup>+</sup>)  $m/z$  187.0754, found 187.0756.

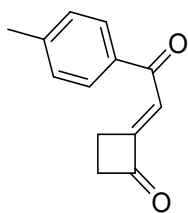

**(3b)** Yield 55% (123 mg); yellow solid; m. p. = 71–73 °C. IR (ATR)  $\nu$  2924, 2860, 2596, 2359, 2302, 2187, 1926, 1664, 1601, 1571, 1474, 1409, 1339, 1297, 1233, 1175, 1090, 1009, 913, 870 cm<sup>-1</sup>. <sup>1</sup>H NMR (600 MHz, CDCl<sub>3</sub>)  $\delta$  7.78 (d,  $J$  = 8.1 Hz, 2H), 7.20 (d,  $J$  = 8.1 Hz, 2H), 7.19 – 7.17 (m, 1H), 3.13 – 3.09 (m, 2H), 3.06 – 3.03 (m, 2H), 2.34 (s, 3H). <sup>13</sup>C NMR (151 MHz, CDCl<sub>3</sub>)  $\delta$  200.3, 190.1, 161.1, 144.8, 135.3, 129.6, 116.1, 46.7, 24.9, 21.7. HRMS (ESI) Calcd. for C<sub>13</sub>H<sub>13</sub>O<sub>2</sub> (M+H<sup>+</sup>)  $m/z$  201.0910, found 201.0913.

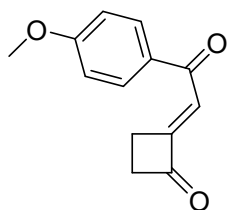

**(3c)** Yield 43% (104 mg); pale yellow solid; m. p. = 105 °C. IR (ATR)  $\nu$  2970, 1743, 1664, 1580, 1463, 1371, 1267, 1180, 1161, 1118, 1096, 1042, 999, 947 cm<sup>-1</sup>. <sup>1</sup>H NMR (600 MHz, CDCl<sub>3</sub>)  $\delta$  7.94 (d,  $J$  = 8.9 Hz, 2H), 7.24 (t,  $J$  = 2.9 Hz, 1H), 6.95 (d,  $J$  = 8.9 Hz, 2H), 3.87 (s, 3H), 3.19 – 3.16 (m, 2H), 3.14 – 3.10 (m, 2H). <sup>13</sup>C NMR (151 MHz, CDCl<sub>3</sub>)  $\delta$  200.4, 188.9, 164.1, 160.7, 131.0, 130.9, 114.2, 55.6, 46.8, 24.9. HRMS (ESI) Calcd. for C<sub>13</sub>H<sub>13</sub>O<sub>3</sub> (M+H<sup>+</sup>)  $m/z$  217.0859, found 217.0865.

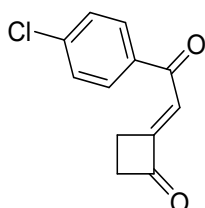

**(3d)** Yield 42% (103 mg); yellow solid; m. p. = 111–113 °C. IR (ATR)  $\nu$  2957, 1751, 1666, 1648, 1582, 1463, 1428, 1371, 1267, 1160, 1157, 1109, 1085, 1042, 999, 947, 689  $\text{cm}^{-1}$ .  $^1\text{H}$  NMR (600 MHz,  $\text{CDCl}_3$ )  $\delta$  7.91 – 7.89 (m, 2H), 7.50 – 7.46 (m, 2H), 7.23 – 7.22 (m, 1H), 3.24 – 3.20 (m, 2H), 3.16 – 3.12 (m, 2H).  $^{13}\text{C}$  NMR (151 MHz,  $\text{CDCl}_3$ )  $\delta$  200.0, 189.4, 162.1, 140.4, 136.1, 129.9, 115.4, 47.0, 25.1. HRMS (ESI) Calcd. for  $\text{C}_{12}\text{H}_{10}\text{ClO}_2$  ( $\text{M}+\text{H}^+$ )  $m/z$  221.0364, found 221.0360.

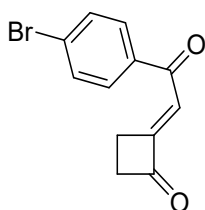

**(3e)** Yield 31% (91 mg); yellow solid; m. p. = 151 °C. IR (ATR)  $\nu$  2935, 1748, 1666, 1618, 1572, 1484, 1389, 1344, 1229, 1175, 1096, 997, 875, 825  $\text{cm}^{-1}$ .  $^1\text{H}$  NMR (600 MHz,  $\text{CDCl}_3$ )  $\delta$  7.81 (d,  $J$  = 8.2 Hz, 2H), 7.63 (d,  $J$  = 8.4 Hz, 2H), 7.21 (t,  $J$  = 3.0 Hz, 1H), 3.23 – 3.19 (m, 2H), 3.15 – 3.11 (m, 2H).  $^{13}\text{C}$  NMR (151 MHz,  $\text{CDCl}_3$ )  $\delta$  200.0, 189.5, 162.2, 136.5, 132.3, 129.9, 129.1, 115.3, 47.0, 25.1. HRMS (ESI) Calcd. for  $\text{C}_{12}\text{H}_{10}\text{BrO}_2$  ( $\text{M}+\text{H}^+$ )  $m/z$  264.9859, found 264.9862.

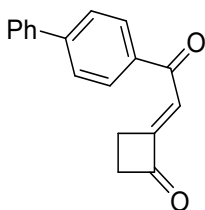

**(3f)** Yield 27% (79 mg); yellow solid; m. p. = 159–161 °C. IR (ATR)  $\nu$  2990, 1751, 1665, 1623, 1591, 1402, 1350, 1317, 1237, 1203, 1095, 1006, 914, 878  $\text{cm}^{-1}$ .  $^1\text{H}$  NMR (600 MHz,  $\text{CDCl}_3$ )  $\delta$  8.03 (d,  $J$  = 8.2 Hz, 2H), 7.72 (d,  $J$  = 8.1 Hz, 2H), 7.64 – 7.63 (m, 2H), 7.48 – 7.46 (m, 2H), 7.42 – 7.40 (m, 1H), 7.32 – 7.31 (m, 1H), 3.23 – 3.20 (m, 2H), 3.18 – 3.14 (m, 2H).  $^{13}\text{C}$  NMR (151 MHz,  $\text{CDCl}_3$ )  $\delta$  161.5, 146.4, 139.6, 136.5, 129.16, 129.10, 128.5, 127.5, 127.3, 116.0, 46.9, 25.0. HRMS (ESI) Calcd. for  $\text{C}_{18}\text{H}_{15}\text{O}_2$  ( $\text{M}+\text{H}^+$ )  $m/z$  263.1067, found 263.1072.

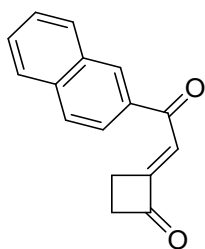

**(3g)** Yield 50% (132 mg); yellow solid; m. p. = 134–136 °C. IR (ATR)  $\nu$  2975, 1733, 1656, 1623, 1598, 1425, 1321, 1267, 1180, 1118, 1096, 999, 947  $\text{cm}^{-1}$ .  $^1\text{H}$  NMR (600 MHz,  $\text{CDCl}_3$ )  $\delta$  8.45 (s, 1H), 8.02 – 8.00 (m, 1H), 7.95 – 7.94 (m, 1H), 7.90 – 7.89 (m, 1H), 7.87 – 7.85 (m, 1H), 7.62 – 7.59 (m, 1H), 7.57 – 7.54 (m, 1H), 7.42 – 7.41 (m, 1H), 3.23 – 3.20 (m, 2H), 3.17 – 3.14 (m, 2H).  $^{13}\text{C}$  NMR (151 MHz,  $\text{CDCl}_3$ )  $\delta$  200.3, 190.3, 161.4, 135.8, 135.1, 132.5, 130.6, 129.8, 129.0, 128.9, 127.9, 127.1, 123.7, 116.0, 46.9, 25.0. HRMS (ESI) Calcd. for  $\text{C}_{16}\text{H}_{13}\text{O}_2$  ( $\text{M}+\text{H}^+$ )  $m/z$  237.0910, found 237.0925.

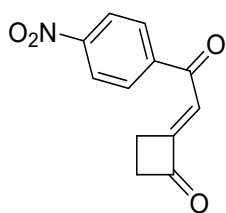

**(3h)** Yield 42% (108 mg); yellow solid; m. p. = 134–136 °C. IR (ATR)  $\nu$  2964, 1751, 1706, 1672, 1597, 1515, 1465, 1426, 1397, 1334, 1218, 1101, 1015, 957, 848  $\text{cm}^{-1}$ .  $^1\text{H}$  NMR (600 MHz,  $\text{CDCl}_3$ )  $\delta$  8.28 (d,  $J$  = 8.7 Hz, 2H), 8.05 (d,  $J$  = 8.8 Hz, 2H), 7.20 – 7.19 (m, 1H), 3.21 – 3.18 (m, 2H), 3.13 – 3.09 (m, 2H).  $^{13}\text{C}$  NMR (151 MHz,  $\text{CDCl}_3$ )  $\delta$  199.5, 189.1, 163.6, 150.6, 142.0, 129.5, 124.2, 114.8, 47.1, 25.4. HRMS (ESI) Calcd. for  $\text{C}_{12}\text{H}_{10}\text{NO}_4$  ( $\text{M}+\text{H}^+$ )  $m/z$  232.0604, found 232.0607.

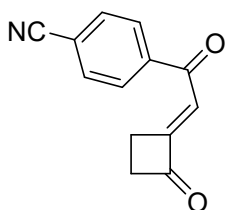

**(3i)** Yield 33% (78 mg); pale orange solid; m. p. = 128 °C. IR (ATR)  $\nu$  2969, 2233, 1753, 1724, 1675, 1626, 1565, 1531, 1463, 1398, 1349, 1231, 1093, 1048, 891  $\text{cm}^{-1}$ .  $^1\text{H}$  NMR (600 MHz,  $\text{CDCl}_3$ )  $\delta$  8.03 (d,  $J$  = 8.2 Hz, 2H), 7.80 (d,  $J$  = 8.2 Hz, 2H), 7.23 – 7.22 (m, 1H), 3.25 – 3.22 (m, 2H), 3.16 – 3.12 (m, 2H).  $^{13}\text{C}$  NMR (151 MHz,  $\text{CDCl}_3$ )  $\delta$  199.6, 189.2, 163.3, 140.5, 132.8, 128.8, 117.8, 116.8, 114.7, 47.0, 25.3. HRMS (ESI) Calcd. for  $\text{C}_{13}\text{H}_{10}\text{NO}_2$  ( $\text{M}+\text{H}^+$ )  $m/z$  212.0706, found 212.0692.

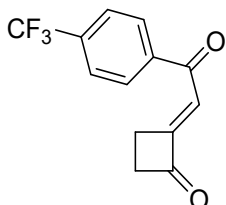

**(3j)** Yield 35% (99 mg); yellowish solid; m. p. = 134°C. IR (ATR)  $\nu$  2929, 1754, 1655, 1586, 1486, 1442, 1385, 1323, 1225, 1178, 1084, 1004, 870, 774  $\text{cm}^{-1}$ .  $^1\text{H}$  NMR (600 MHz,  $\text{CDCl}_3$ )  $\delta$  8.05 (d,  $J$  = 8.1 Hz, 2H), 7.76 (d,  $J$  = 8.0 Hz, 2H), 7.26 – 7.25 (m, 1H), 3.25 – 3.22 (m, 2H), 3.18 – 3.13 (m, 2H).  $^{13}\text{C}$  NMR (151 MHz,  $\text{CDCl}_3$ )  $\delta$  199.8, 189.6, 162.9, 140.3, 134.9 (q,  $J$  = 32.9 Hz), 128.8, 126.0 (q,  $J$  = 3.9 Hz), 123.5 (q,  $J$  = 273.1 Hz), 115.1, 47.0, 25.3. HRMS (ESI) Calcd. for  $\text{C}_{13}\text{H}_{10}\text{F}_3\text{O}_2$  ( $\text{M}+\text{H}^+$ )  $m/z$  255.0627, found 255.0624.

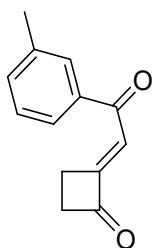

**(3k)** Yield 35% (78 mg); yellow solid; m. p. = 84–85 °C. IR (ATR)  $\nu$  2918, 1748, 1664, 1614, 1576, 1445, 1426, 1356, 1306, 1248, 1187, 1094, 1015, 933, 730  $\text{cm}^{-1}$ .  $^1\text{H}$  NMR (600 MHz,  $\text{CDCl}_3$ )  $\delta$  7.69 – 7.67 (m, 2H), 7.34 – 7.29 (m, 2H), 7.20 – 7.19 (m, 1H), 3.14 – 3.11 (m, 2H), 3.07 – 3.04 (m, 2H), 2.34 (s, 3H).  $^{13}\text{C}$  NMR (151 MHz,  $\text{CDCl}_3$ )  $\delta$  200.3, 190.7, 161.2, 138.8, 137.8, 134.5, 129.0, 128.8, 125.7, 116.2, 46.8, 24.9, 21.4. HRMS (ESI) Calcd. for  $\text{C}_{13}\text{H}_{13}\text{O}_2$  ( $\text{M}+\text{H}^+$ )  $m/z$  201.0910, found 201.0912.

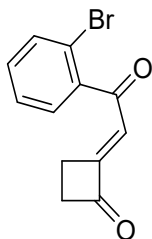

**(3I)** Yield 31% (91 mg); yellow solid; m. p. = 143 °C. IR (ATR)  $\nu$  2929, 1986, 1732, 1695, 1589, 1476, 1432, 1365, 1322, 1221, 1172, 1084, 870, 771  $\text{cm}^{-1}$ .  $^1\text{H}$  NMR (600 MHz,  $\text{CDCl}_3$ )  $\delta$  7.64 – 7.63 (m, 1H), 7.45 – 7.40 (m, 2H), 7.37 – 7.34 (m, 1H), 6.91 – 6.90 (m, 1H), 3.18 – 3.15 (m, 2H), 2.92 – 2.88 (m, 2H).  $^{13}\text{C}$  NMR (151 MHz,  $\text{CDCl}_3$ )  $\delta$  199.7, 193.7, 160.9, 141.0, 133.8, 132.5, 129.4, 127.9, 119.5, 119.3, 46.8, 24.8. HRMS (ESI) Calcd. for  $\text{C}_{12}\text{H}_{10}\text{BrO}_2$  ( $\text{M}+\text{H}^+$ )  $m/z$  264.9859, found 264.9866.

### General procedure for the preparation of 5a-q and 6a-e

A solution of **3** (0.215 mmol) and **4** (0.215 mmol) in EtOAc (2 mL) was stirred in a sealed tube reactor at reflux for 8 h. The crude mixture, without aqueous work-up, was directly purified by flash column chromatography ( $\text{SiO}_2$ , petroleum ether/ether = 5:1  $\rightarrow$  1:1) to give compound **5** or **6**.

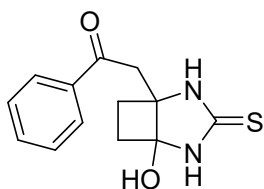

**(5a)** The reaction was conducted with 0.108 mmol of **3a** and **4a** in 1 mL of EtOAc (see Table 1, entry 2). Yield 89% (25 mg); white solid; m. p. = 110 °C. IR (ATR)  $\nu$  3679, 3436, 3204, 1740, 1706, 1690, 1668, 1644, 1548, 1531, 1498, 1465, 1385, 1262, 1198, 1036, 906  $\text{cm}^{-1}$ .  $^1\text{H}$  NMR (600 MHz,  $\text{DMSO}-d_6$ )  $\delta$  8.94 (s, 1H), 8.04 (s, 1H), 7.94 (dd,  $J$  = 8.1, 1.3 Hz, 2H), 7.65 (t,  $J$  = 7.4 Hz, 1H), 7.55 (t,  $J$  = 7.7 Hz, 2H), 6.43 (s, 1H), 3.63 – 3.60 (m, 1H), 3.29 – 3.26 (m, 1H), 2.33 – 2.24 (m, 2H), 2.14 – 2.10 (m, 1H), 1.82 – 1.77 (m, 1H).  $^{13}\text{C}$  NMR (151 MHz,  $\text{DMSO}-d_6$ )  $\delta$  196.9, 181.6, 136.9, 133.2, 128.6, 127.8, 90.2, 66.5, 39.3, 32.8, 28.6. HRMS (ESI) Calcd. for  $\text{C}_{13}\text{H}_{15}\text{N}_2\text{O}_2\text{S}$  ( $\text{M}+\text{H}^+$ )  $m/z$  263.0849, found 263.0844.

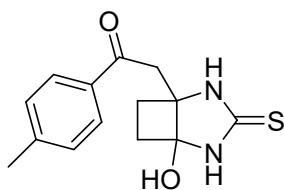

**(5b)** Yield 91% (54 mg); white solid; m. p. = 125 °C. IR (ATR)  $\nu$  3698, 3618, 3302, 2948, 1743, 1706, 1671, 1606, 1579, 1507, 1444, 1370, 1267, 1175, 1089, 989  $\text{cm}^{-1}$ .  $^1\text{H}$  NMR (600 MHz,  $\text{DMSO-}d_6$ )  $\delta$  8.92 (s, 1H), 7.97 (s, 1H), 7.82 (d,  $J$  = 8.3 Hz, 2H), 7.33 (d,  $J$  = 7.9 Hz, 2H), 6.41 (s, 1H), 3.57 – 3.54 (m, 1H), 3.23 – 3.20 (m, 1H), 2.36 (s, 3H), 2.29 – 2.23 (m, 2H), 2.10 – 2.05 (m, 1H), 1.79 – 1.74 (m, 1H).  $^{13}\text{C}$  NMR (151 MHz,  $\text{DMSO-}d_6$ )  $\delta$  196.5, 181.6, 143.6, 134.5, 129.2, 128.0, 90.2, 66.5, 39.2, 32.8, 28.6, 21.1. HRMS (ESI) Calcd. for  $\text{C}_{14}\text{H}_{17}\text{N}_2\text{O}_2\text{S}$  ( $\text{M}+\text{H}^+$ )  $m/z$  277.1005, found 277.1020.

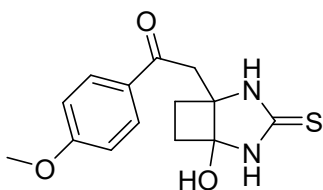

**(5c)** Yield 90% (57 mg); yellow oil. IR (ATR)  $\nu$  3680, 3457, 2958, 1777, 1643, 1594, 1486, 1411, 1371, 1313, 1257, 1161, 1019, 992, 877  $\text{cm}^{-1}$ .  $^1\text{H}$  NMR (600 MHz,  $\text{DMSO-}d_6$ )  $\delta$  8.94 (s, 1H), 7.95 – 7.91 (m, 3H), 7.07– 7.05 (m, 2H), 6.43 (br s, 1H), 3.84 (s, 3H), 3.56 (d,  $J$  = 17.8 Hz, 1H), 3.20 (d,  $J$  = 17.8 Hz, 1H), 2.32 – 2.24 (m, 2H), 2.11 – 2.06 (m, 1H), 1.80 – 1.75 (1H).  $^{13}\text{C}$  NMR (151 MHz,  $\text{DMSO-}d_6$ )  $\delta$  195.5, 181.6, 163.2, 130.2, 129.9, 113.9, 90.2, 66.6, 55.5, 38.9, 32.8, 28.6. HRMS (ESI) Calcd. for  $\text{C}_{14}\text{H}_{17}\text{N}_2\text{O}_3\text{S}$  ( $\text{M}+\text{H}^+$ )  $m/z$  293.0954, found 293.0963.

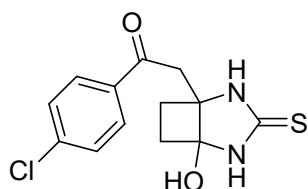

**(5d)** Yield 59% (38 mg); white solid; m. p. = 138–139 °C. IR (ATR)  $\nu$  3618, 3224, 2963, 1677, 1559, 1496, 1398, 1332, 1260, 1217, 1151, 1081, 1010, 996, 869  $\text{cm}^{-1}$ .  $^1\text{H}$



NMR (600 MHz, DMSO-*d*<sub>6</sub>) δ 8.94 (s, 1H), 8.07 (s, 1H), 7.96 – 7.94 (m, 2H), 7.63 – 7.62 (m, 2H), 6.44 (s, 1H), 3.60 – 3.57 (m, 1H), 3.28 – 3.25 (m, 1H), 2.30 – 2.26 (m, 2H), 2.16 – 2.11 (m, 1H), 1.82 – 1.77 (m, 1H). <sup>13</sup>C NMR (151 MHz, DMSO-*d*<sub>6</sub>) δ 195.9, 181.6, 138.0, 135.7, 129.8, 128.8, 90.2, 66.5, 39.3, 32.8, 28.5. HRMS (ESI) Calcd. for C<sub>13</sub>H<sub>14</sub>ClN<sub>2</sub>O<sub>2</sub>S (M+H<sup>+</sup>) *m/z* 297.0459, found 297.0462.

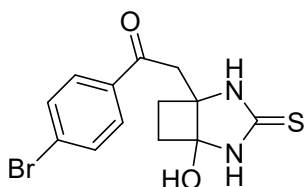

**(5e)** Yield 51% (37 mg); white solid; m. p. = 154 °C. IR (ATR) ν 3617, 3315, 2981, 1748, 1677, 1617, 1576, 1512, 1496, 1462, 1391, 1348, 1285, 1179, 1087, 923 cm<sup>-1</sup>. <sup>1</sup>H NMR (600 MHz, DMSO-*d*<sub>6</sub>) δ 8.91 (s, 1H), 8.04 (s, 1H), 7.85 – 7.83 (m, 2H), 7.75 – 7.73 (m, 2H), 6.43 (br s, 1H), 3.57 – 3.54 (m, 1H), 3.25 – 3.22 (m, 1H), 2.29 – 2.22 (m, 2H), 2.13 – 2.08 (m, 1H), 1.79 – 1.74 (m, 1H). <sup>13</sup>C NMR (151 MHz, DMSO-*d*<sub>6</sub>) δ 196.2, 181.6, 136.0, 131.7, 129.9, 127.3, 90.3, 66.5, 39.3, 32.8, 28.6. HRMS (ESI) Calcd. for C<sub>13</sub>H<sub>14</sub>BrN<sub>2</sub>O<sub>2</sub>S (M+H<sup>+</sup>) *m/z* 340.9954, found 340.9962.

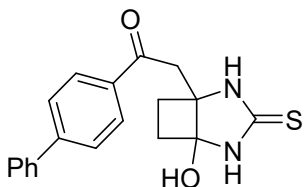

**(5f)** Yield 73% (53 mg); white solid; m. p. = 177–178 °C. IR (ATR) ν 3618, 3438, 2994, 1781, 1677, 1600, 1546, 1482, 1436, 1300, 1261, 1210, 1148, 1024, 904 cm<sup>-1</sup>. <sup>1</sup>H NMR (600 MHz, DMSO-*d*<sub>6</sub>) δ 8.97 (s, 1H), 8.07 (s, 1H), 8.03 (d, *J* = 8.1 Hz, 2H), 7.85 (d, *J* = 8.2 Hz, 2H), 7.75 (d, *J* = 7.6 Hz, 2H), 7.51 (t, *J* = 7.6 Hz, 2H), 7.43 (t, *J* = 7.4 Hz, 1H), 6.48 (s, 1H), 3.66 – 3.63 (m, 1H), 3.36 – 3.33 (m, 1H), 2.35 – 2.26 (m, 2H), 2.17 – 2.12 (m, 1H), 1.84 – 1.79 (m, 1H). <sup>13</sup>C NMR (151 MHz, DMSO-*d*<sub>6</sub>) δ 196.5, 181.6, 144.5, 138.8, 135.7, 129.1, 128.6, 128.4, 126.9, 126.8, 90.3, 66.6, 39.3, 32.8, 28.6. HRMS (ESI) Calcd. for C<sub>19</sub>H<sub>19</sub>N<sub>2</sub>O<sub>2</sub>S (M+H<sup>+</sup>) *m/z* 339.1162, found 339.1171.

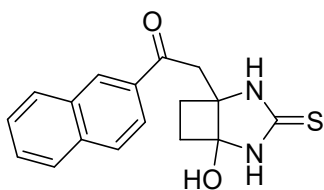

**(5g)** Yield 73% (49 mg); white solid; m. p. = 169 °C. IR (ATR)  $\nu$  3623, 3438, 2981, 1715, 1664, 1629, 1515, 1446, 1421, 1382, 1274, 1168, 983  $\text{cm}^{-1}$ .  $^1\text{H}$  NMR (600 MHz,  $\text{DMSO-}d_6$ )  $\delta$  8.97 (s, 1H), 8.64 (s, 1H), 8.16 – 8.15 (m, 1H), 8.08 (s, 1H), 8.04 – 9.99 (m, 3H), 7.69 – 7.67 (m, 1H), 7.64 – 7.62 (m, 1H), 6.49 (s, 1H), 3.77 (d,  $J$  = 17.8 Hz, 1H), 3.40 (d,  $J$  = 17.9 Hz, 1H), 2.36 – 2.27 (m, 2H), 2.19 – 2.15 (m, 1H), 1.85 – 1.80 (m, 1H).  $^{13}\text{C}$  NMR (151 MHz,  $\text{DMSO-}d_6$ )  $\delta$  197.0, 181.6, 135.0, 134.3, 132.1, 129.8, 129.6, 128.6, 128.2, 127.6, 126.9, 123.5, 90.3, 66.7, 32.8, 28.6 (one carbon overlaps with DMSO). HRMS (ESI) Calcd. for  $\text{C}_{17}\text{H}_{17}\text{N}_2\text{O}_2\text{S}$  ( $\text{M}+\text{H}^+$ )  $m/z$  313.1005, found 313.1018.

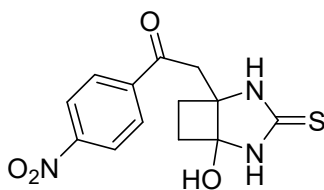

**(5h)** Yield 88% (58 mg); yellow solid; m. p. = 136 °C. IR (ATR)  $\nu$  3393, 2980, 1725, 1642, 1560, 1443, 1380, 1217, 1198, 1105, 1014, 1002, 822, 758  $\text{cm}^{-1}$ .  $^1\text{H}$  NMR (600 MHz,  $\text{DMSO-}d_6$ )  $\delta$  8.95 (s, 1H), 8.36 (d,  $J$  = 8.4 Hz, 2H), 8.14 (d,  $J$  = 8.8 Hz, 3H), 6.48 (s, 1H), 3.68 – 3.65 (m, 1H), 3.35 – 3.32 (m, 1H), 2.32 – 2.25 (m, 2H), 2.19 – 2.15 (m, 1H), 1.83 – 1.78 (m, 1H).  $^{13}\text{C}$  NMR (151 MHz,  $\text{DMSO-}d_6$ )  $\delta$  196.1, 181.6, 149.8, 141.6, 129.3, 123.8, 90.3, 66.5, 39.9, 32.8, 28.5. HRMS (ESI) Calcd. for  $\text{C}_{13}\text{H}_{14}\text{N}_3\text{O}_4\text{S}$  ( $\text{M}+\text{H}^+$ )  $m/z$  308.0700, found 308.0710.

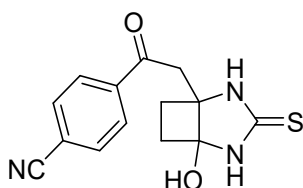

**(5i)** Yield 89% (55 mg); pale yellow solid; m. p. = 140–142 °C. IR (ATR)  $\nu$  3383, 2994, 2235, 1780, 1689, 1515, 1498, 1407, 1304, 1262, 1212, 1158, 994, 827  $\text{cm}^{-1}$ .  $^1\text{H}$

NMR (600 MHz, DMSO-*d*<sub>6</sub>) δ 8.94 (s, 1H), 8.12 (s, 1H), 8.06 (d, *J* = 8.0 Hz, 2H), 8.02 (d, *J* = 8.0 Hz, 2H), 6.46 (s, 1H), 3.64 – 3.61 (m, 1H), 3.32 – 3.29 (m, 1H), 2.31 – 2.24 (m, 2H), 2.17 – 2.13 (m, 1H), 1.82 – 1.76 (m, 1H). <sup>13</sup>C NMR (151 MHz, DMSO-*d*<sub>6</sub>) δ 196.3, 181.6, 140.2, 132.7, 128.5, 118.1, 115.0, 90.3, 66.5, 39.7, 32.8, 28.5. HRMS (ESI) Calcd. for C<sub>14</sub>H<sub>14</sub>N<sub>3</sub>O<sub>2</sub>S (M+H<sup>+</sup>) *m/z* 288.0801, found 288.0810.

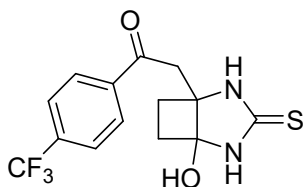

**(5j)** Yield 55% (39 mg); white solid; m. p. = 143 °C. IR (ATR) ν 3398, 1734, 1690, 1643, 1503, 1412, 1384, 1321, 1263, 1159, 1132, 1014, 997, 830 cm<sup>-1</sup>. <sup>1</sup>H NMR (600 MHz, DMSO-*d*<sub>6</sub>) δ 8.95 (s, 1H), 8.12 – 8.11 (m, 3H), 7.93 – 7.92 (m, 2H), 6.47 (br s, 1H), 3.66 – 3.63 (m, 1H), 3.34 – 3.31 (m, 1H), 2.32 – 2.25 (m, 2H), 2.19 – 2.14 (m, 1H), 1.83 – 1.78 (m, 1H). <sup>13</sup>C NMR (151 MHz, DMSO-*d*<sub>6</sub>) δ 196.3, 181.6, 140.1, 132.4 (q, *J* = 31.6 Hz), 128.7, 125.6 (q, *J* = 3.4 Hz), 123.80 (q, *J* = 273.0 Hz), 90.3, 66.5, 39.6, 32.8, 28.5. <sup>19</sup>F NMR (565 MHz, DMSO-*d*<sub>6</sub>) δ -61.52. HRMS (ESI) Calcd. for C<sub>14</sub>H<sub>14</sub>F<sub>3</sub>N<sub>2</sub>O<sub>2</sub>S (M+H<sup>+</sup>) *m/z* 331.0723, found 331.0732.

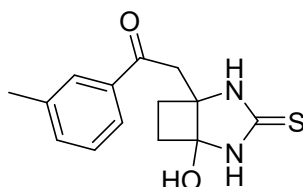

**(5k)** Yield 90% (53 mg); brownish paste; IR (ATR) ν 3638, 2995, 1739, 1690, 1678, 1515, 1427, 1376, 1262, 1212, 1157, 1045, 990, 843 cm<sup>-1</sup>. <sup>1</sup>H NMR (600 MHz, CDCl<sub>3</sub>) δ 7.73 – 7.68 (m, 3H), 7.37 – 7.35 (m, 1H), 7.33 – 7.30 (m, 2H), 3.73 – 3.70 (m, 1H), 3.34 – 3.31 (m, 1H), 2.54 – 2.50 (m, 1H), 2.44 – 2.40 (m, 1H), 2.37 (s, 3H), 2.11 – 2.05 (m, 1H), 2.00 – 1.95 (m, 1H), the OH signal is not visible in the <sup>1</sup>H NMR spectrum. <sup>13</sup>C NMR (151 MHz, CDCl<sub>3</sub>) δ 198.3, 181.6, 138.7, 136.4, 134.8, 128.8, 128.7, 125.6, 91.1, 67.6, 40.0, 33.1, 28.8, 21.4. HRMS (ESI) Calcd. for C<sub>14</sub>H<sub>17</sub>N<sub>2</sub>O<sub>2</sub>S (M+H<sup>+</sup>) *m/z* 277.1005, found 277.1017.

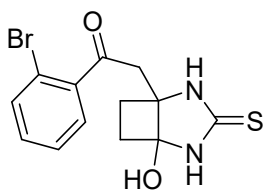

**(5l)** Yield 86% (63 mg); white solid; m. p. = 143 °C. IR (ATR)  $\nu$  3661, 3403, 2956, 1738, 1643, 1594, 1486, 1427, 1376, 1262, 1102, 1041, 1023, 976, 899  $\text{cm}^{-1}$ .  $^1\text{H}$  NMR (600 MHz,  $\text{CDCl}_3$ )  $\delta$  7.60 – 7.58 (m, 2H), 7.52 – 7.51 (m, 1H), 7.40 – 7.38 (m, 1H), 7.33 – 7.28 (m, 2H), 5.29 (br s, 1H), 3.73 – 3.70 (m, 1H), 3.37 – 3.34 (m, 1H), 2.57 – 2.53 (m, 1H), 2.46 – 2.41 (m, 1H), 2.12 – 2.09 (m, 2H).  $^{13}\text{C}$  NMR (151 MHz,  $\text{CDCl}_3$ )  $\delta$  201.9, 181.7, 140.2, 134.1, 132.6, 129.2, 127.8, 119.0, 91.2, 67.6, 44.0, 33.0, 28.7. HRMS (ESI) Calcd. for  $\text{C}_{13}\text{H}_{14}\text{BrN}_2\text{O}_2\text{S}$  ( $\text{M}+\text{H}^+$ )  $m/z$  340.9954, found 340.9967.

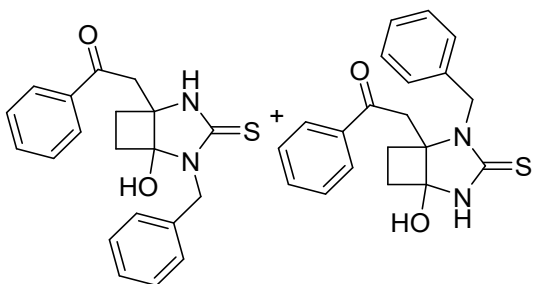

**(5m+5'm)** Overall yield 86% (65 mg). **(5m)** White solid; m. p. = 167 °C. IR (ATR)  $\nu$  3658, 3389, 2911, 1745, 1640, 1512, 1487, 1432, 1365, 1260, 1105, 1089, 1001, 934, 819  $\text{cm}^{-1}$ .  $^1\text{H}$  NMR (600 MHz,  $\text{DMSO}-d_6$ )  $\delta$  8.46 (s, 1H), 7.96 (d,  $J = 7.7$  Hz, 2H), 7.66 (t,  $J = 7.4$  Hz, 1H), 7.55 (t,  $J = 7.6$  Hz, 2H), 7.42 (d,  $J = 7.5$  Hz, 2H), 7.33 (t,  $J = 7.5$  Hz, 2H), 7.26 – 7.23 (m, 1H), 6.75 (s, 1H), 5.16 (d,  $J = 15.6$  Hz, 1H), 4.43 (d,  $J = 15.6$  Hz, 1H), 3.66 – 3.63 (m, 1H), 3.35 – 3.32 (m, 1H), 2.16 – 2.06 (m, 2H), 1.88 – 1.84 (m, 1H), 1.79 – 1.74 (m, 1H).  $^{13}\text{C}$  NMR (151 MHz,  $\text{DMSO}-d_6$ )  $\delta$  196.8, 182.2, 139.2, 136.9, 133.2, 128.7, 128.1, 127.9, 127.3, 126.8, 92.5, 64.2, 44.1, 39.3, 31.0, 28.2. HRMS (ESI) Calcd. for  $\text{C}_{20}\text{H}_{21}\text{N}_2\text{O}_2\text{S}$  ( $\text{M}+\text{H}^+$ )  $m/z$  353.1318, found 353.1328. The following data are attributed to **(5'm)** in a mixture with **(5m)**:  $^1\text{H}$  NMR (600 MHz,  $\text{DMSO}-d_6$ )  $\delta$  9.20 (s, 1H), 7.67 – 7.64 (m, 2H), 7.56 – 7.54 (m, 1H), 7.44 – 7.41 (m, 2H), 7.26 – 7.23 (m, 2H), 7.13 – 7.10 (m, 2H), 7.05 – 7.02 (m, 1H), 6.32 (s, 1H), 4.82 – 4.75 (m, 2H), 3.53 – 3.50 (m, 1H), 3.30 – 3.27 (m, 1H), 2.33 – 2.22 (m, 2H), 2.16 – 2.06 (m, 1H), 1.70 – 1.65 (m, 1H).  $^{13}\text{C}$  NMR (151 MHz,  $\text{DMSO}-d_6$ )  $\delta$  196.5, 182.1,

136.8, 132.9, 128.3, 127.8, 127.57, 127.55, 126.6, 87.0, 69.7, 46.5, 37.6, 32.6, 27.2.  
HRMS (ESI) Calcd. for C<sub>20</sub>H<sub>21</sub>N<sub>2</sub>O<sub>2</sub>S (M+H<sup>+</sup>) *m/z* 353.1318, found 353.1328.

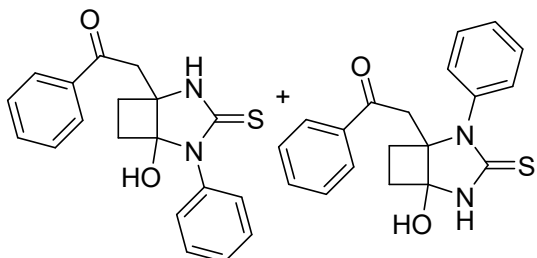

**(5n+5'n)** Overall yield 77% (56 mg). **(5n)** White solid; m. p. = 151 °C. IR (ATR)  $\nu$  3645, 3348, 2980, 1734, 1667, 1623, 1589, 1503, 1457, 1378, 1307, 1298, 1212, 1082, 984 cm<sup>-1</sup>. <sup>1</sup>H NMR (600 MHz, DMSO-*d*<sub>6</sub>)  $\delta$  8.69 (s, 1H), 8.00 – 7.99 (m, 2H), 7.68 – 7.66 (m, 1H), 7.58 – 7.56 (m, 2H), 7.43 – 7.39 (m, 4H), 7.34 – 7.31 (m, 1H), 7.00 (s, 1H), 3.76 – 3.73 (m, 1H), 3.46 – 3.43 (m, 1H), 2.27 – 2.18 (m, 3H), 2.02 – 1.96 (m, 1H). <sup>13</sup>C NMR (151 MHz, DMSO-*d*<sub>6</sub>)  $\delta$  196.7, 181.8, 137.3, 136.9, 133.2, 129.5, 128.7, 128.2, 127.9, 127.0, 93.9, 64.6, 39.3, 30.5, 28.4. HRMS (ESI) Calcd. for C<sub>19</sub>H<sub>19</sub>N<sub>2</sub>O<sub>2</sub>S (M+H<sup>+</sup>) *m/z* 339.1162, found 339.1175. **(5'n)** White solid; m. p. = 160 °C. IR (ATR)  $\nu$  3640, 3323, 2941, 1712, 1660, 1615, 1568, 1499, 1410, 1388, 1300, 1267, 1222, 1073, 976 cm<sup>-1</sup>. <sup>1</sup>H NMR (600 MHz, CDCl<sub>3</sub>)  $\delta$  7.53 – 7.49 (m, 3H), 7.45 – 7.43 (m, 1H), 7.32 – 7.29 (m, 2H), 7.17 – 7.15 (m, 2H), 7.13 – 7.08 (m, 3H), 6.96 (s, 1H), 3.72 (d, *J* = 17.6 Hz, 1H), 3.24 (d, *J* = 17.6 Hz, 1H), 2.70 – 2.65 (m, 1H), 2.60 – 2.56 (m, 1H), 2.53 – 2.48 (m, 1H), 2.30 – 2.25 (m, 1H). <sup>13</sup>C NMR (151 MHz, CDCl<sub>3</sub>)  $\delta$  199.7, 181.7, 137.0, 136.3, 134.1, 130.3, 129.0, 128.6, 128.1, 127.8, 87.8, 72.8, 38.7, 32.4, 28.6. HRMS (ESI) Calcd. for C<sub>19</sub>H<sub>19</sub>N<sub>2</sub>O<sub>2</sub>S (M+H<sup>+</sup>) *m/z* 339.1162, found 339.1174.

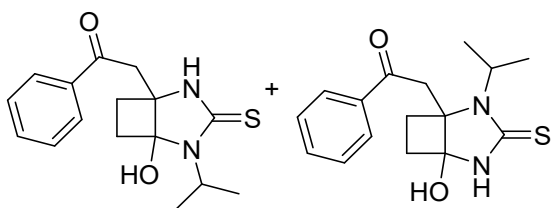

**(5o+5'o)** Overall yield 85% (55 mg). **(5o)** Yellow solid; m. p. = 140 °C. IR (ATR)  $\nu$  3621, 3331, 2945, 1710, 1689, 1635, 1542, 1484, 1413, 1345, 1274, 1262, 1123, 1073,

912  $\text{cm}^{-1}$ .  $^1\text{H}$  NMR (600 MHz,  $\text{CDCl}_3$ )  $\delta$  7.94 (d,  $J = 7.8$  Hz, 2H), 7.60 (t,  $J = 7.4$  Hz, 1H), 7.47 (t,  $J = 7.6$  Hz, 2H), 6.77 (br s, 1H), 4.86 (br s, 1H), 4.63 – 4.59 (m, 1H), 3.78 (d,  $J = 17.6$  Hz, 1H), 3.33 (d,  $J = 17.5$  Hz, 1H), 2.65 – 2.61 (m, 1H), 2.52 – 2.47 (m, 1H), 2.08 – 1.98 (m, 2H), 1.43 – 1.41 (m, 6H).  $^{13}\text{C}$  NMR (151 MHz,  $\text{CDCl}_3$ )  $\delta$  199.3, 181.2, 136.5, 134.2, 128.9, 128.6, 94.3, 64.4, 48.7, 40.6, 33.7, 28.6, 22.8, 20.0. HRMS (ESI) Calcd. for  $\text{C}_{16}\text{H}_{21}\text{N}_2\text{O}_2\text{S}$  ( $\text{M}+\text{H}^+$ )  $m/z$  305.1318, found 305.1327. The following data are attributed to (**5'o**) in a mixture with **5o**:  $^1\text{H}$  NMR (600 MHz,  $\text{CDCl}_3$ )  $\delta$  7.63 – 7.62 (m, 1H), 7.51 – 7.48 (m, 2H), 6.75 (br s, 1H), 4.88 – 4.83 (m, 1H), 4.47 (br s, 1H), 4.05 – 4.02 (m, 1H), 3.51 – 3.48 (m, 1H), 2.45 – 2.40 (m, 1H), 2.16 – 2.09 (m, 1H), 1.21 (d,  $J = 7.0$  Hz, 3H), 0.94 (d,  $J = 7.0$  Hz, 3H).  $^{13}\text{C}$  NMR (151 MHz,  $\text{CDCl}_3$ )  $\delta$  199.0, 181.8, 136.4, 134.3, 129.1, 128.3, 87.0, 69.8, 48.3, 39.7, 32.0, 29.3, 21.9, 20.1. HRMS (ESI) Calcd. for  $\text{C}_{16}\text{H}_{21}\text{N}_2\text{O}_2\text{S}$  ( $\text{M}+\text{H}^+$ )  $m/z$  305.1318, found 305.1326.

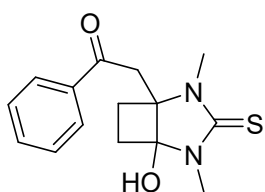

(**5p**) Yield 10% (6 mg); orange oil. IR (ATR)  $\nu$  3329, 2944, 1716, 1682, 1594, 1446, 1377, 1326, 1218, 1176, 1122, 1045, 998, 913  $\text{cm}^{-1}$ .  $^1\text{H}$  NMR (600 MHz,  $\text{CDCl}_3$ )  $\delta$  7.99 – 7.97 (m, 2H), 7.65 – 7.63 (m, 1H), 7.52 – 7.49 (m, 2H), 4.85 (br s, 1H), 3.96 – 3.93 (m, 1H), 3.38 – 3.34 (m, 1H), 3.19 (s, 3H), 2.90 (s, 3H), 2.46 – 2.36 (m, 2H), 2.04 – 1.99 (m, 1H), 1.94 – 1.88 (m, 1H).  $^{13}\text{C}$  NMR (151 MHz,  $\text{CDCl}_3$ )  $\delta$  199.1, 136.1, 134.6, 129.1, 128.6, 90.1, 68.3, 38.4, 30.0, 29.2, 28.5, 25.5. HRMS (ESI) Calcd. for  $\text{C}_{15}\text{H}_{19}\text{N}_2\text{O}_2\text{S}$  ( $\text{M}+\text{H}^+$ )  $m/z$  291.1162, found 291.1176.

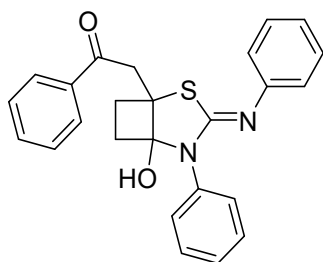

**(6a)** Yield 84% (75 mg); white solid; m. p. = 210–212 °C. IR (ATR)  $\nu$  3332, 2949, 2217, 1709, 1698, 1555, 1472, 1398, 1264, 1216, 1159, 1130, 991, 833  $\text{cm}^{-1}$ .  $^1\text{H}$  NMR (600 MHz,  $\text{CDCl}_3$ )  $\delta$  7.95 – 7.93 (m, 2H), 7.62 – 7.59 (m, 1H), 7.57 – 7.56 (m, 2H), 7.49 – 7.46 (m, 2H), 7.44 – 7.41 (m, 2H), 7.30 – 7.27 (m, 1H), 7.20 – 7.17 (m, 2H), 6.97 – 6.95 (m, 1H), 6.93 – 6.91 (m, 2H), 3.90 (d,  $J = 17.6$  Hz, 1H), 3.48 (d,  $J = 17.6$  Hz, 1H), 2.54 – 2.50 (m, 1H), 2.36 – 2.23 (m, 3H).  $^{13}\text{C}$  NMR (151 MHz,  $\text{CDCl}_3$ )  $\delta$  198.5, 158.7, 150.9, 138.5, 136.6, 134.0, 129.2, 128.9, 128.8, 128.5, 127.6, 126.9, 123.5, 122.3, 95.3, 56.0, 43.4, 31.6, 31.5. HRMS (ESI) Calcd. for  $\text{C}_{25}\text{H}_{23}\text{N}_2\text{O}_2\text{S}$  ( $\text{M}+\text{H}^+$ )  $m/z$  415.1475, found 415.1485.

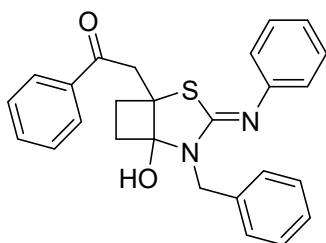

**(6b)** Yield 67% (62 mg); white solid; m. p. = 198–199 °C. IR (ATR)  $\nu$  3310, 2965, 2202, 1753, 1626, 1588, 1579, 1491, 1432, 1304, 1278, 1123, 1040, 937, 829  $\text{cm}^{-1}$ .  $^1\text{H}$  NMR (600 MHz,  $\text{CDCl}_3$ )  $\delta$  7.93 – 7.92 (m, 2H), 7.61 – 7.58 (m, 1H), 7.52 – 7.51 (m, 2H), 7.48 – 7.45 (m, 2H), 7.36 – 7.33 (m, 2H), 7.30 – 7.25 (m, 1H), 7.22 – 7.19 (m, 2H), 6.99 – 6.97 (m, 1H), 6.94 – 6.92 (m, 2H), 4.91 – 4.82 (m, 2H), 3.88 – 3.85 (m, 1H), 3.42 – 3.39 (m, 1H), 2.73 (br s, 1H), 2.41 – 2.37 (m, 1H), 2.35 – 2.30 (m, 1H), 2.24 – 2.16 (m, 1H).  $^{13}\text{C}$  NMR (151 MHz,  $\text{CDCl}_3$ )  $\delta$  198.5, 157.5, 150.7, 139.1, 136.6, 134.0, 128.9, 128.8, 128.6, 128.5, 127.9, 127.2, 123.3, 122.5, 95.2, 55.8, 46.1, 43.3, 31.8, 31.5. HRMS (ESI) Calcd. for  $\text{C}_{26}\text{H}_{25}\text{N}_2\text{O}_2\text{S}$  ( $\text{M}+\text{H}^+$ )  $m/z$  429.1631, found 429.1644.

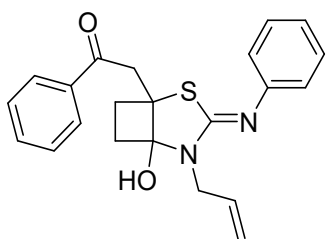

**(6c)** Yield 74% (60 mg); white solid; m. p. = 155 °C. IR (ATR)  $\nu$  3310, 2965, 2245, 2202, 1753, 1668, 1644, 1548, 1476, 1337, 1277, 1168, 973  $\text{cm}^{-1}$ .  $^1\text{H}$  NMR (600 MHz,

CDCl<sub>3</sub>)  $\delta$  7.94 – 7.93 (m, 2H), 7.61 – 7.58 (m, 1H), 7.48 – 7.45 (m, 2H), 7.21 – 7.18 (m, 2H), 6.99 – 6.96 (m, 1H), 6.91 – 6.90 (m, 2H), 6.18 – 6.12 (m, 1H), 5.38 – 5.34 (m, 1H), 5.22 – 5.20 (m, 1H), 4.27 – 4.17 (m, 2H), 3.87 (d,  $J$  = 17.5 Hz, 1H), 3.43 (d,  $J$  = 17.5 Hz, 1H), 2.64 – 2.60 (m, 1H), 2.44 – 2.38 (m, 1H), 2.24 – 2.21 (m, 3H). <sup>13</sup>C NMR (151 MHz, CDCl<sub>3</sub>)  $\delta$  198.5, 156.7, 150.9, 136.7, 134.7, 128.9, 128.8, 128.5, 123.3, 122.5, 116.6, 95.1, 55.8, 45.5, 43.2, 31.9, 31.5. HRMS (ESI) Calcd. for C<sub>22</sub>H<sub>23</sub>N<sub>2</sub>O<sub>2</sub>S (M+H<sup>+</sup>)  $m/z$  379.1475, found 379.1487.

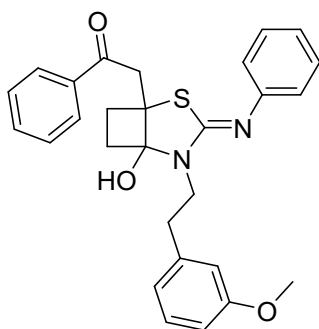

**(6d)** Yield 70 % (71 mg); yellow semi-solid. IR(ATR)  $\nu$  3241, 3063, 2993, 2945, 2839, 1683, 1619, 1577, 1489, 1454, 1347, 1318, 1235, 1158, 1047, 999, 694 cm<sup>-1</sup>. <sup>1</sup>H NMR (600 MHz, CDCl<sub>3</sub>)  $\delta$  7.89 – 7.87 (m, 2H), 7.59 – 7.56 (m, 1H), 7.45 – 7.43 (m, 2H), 7.25 – 7.22 (m, 3H), 7.01 – 6.99 (m, 3H), 6.91 – 6.90 (m, 1H), 6.88 – 6.87 (m, 1H), 6.80 – 6.78 (m, 1H), 3.86 – 3.82 (m, 1H), 3.80 (s, 3H), 3.77 (d,  $J$  = 17.8 Hz, 1H), 3.70 – 3.65 (m, 1H), 3.51 (br s, 1H), 3.30 (d,  $J$  = 17.8 Hz, 1H), 3.26 – 3.21 (m, 1H), 3.18 – 3.14 (m, 1H), 2.30 – 2.24 (m, 1H), 2.23 – 2.18 (m, 1H), 2.11 – 2.08 (m, 2H). <sup>13</sup>C NMR (151 MHz, CDCl<sub>3</sub>)  $\delta$  198.0, 159.8, 157.5, 150.6, 141.6, 136.5, 133.9, 129.6, 128.9, 128.8, 128.4, 123.4, 122.6, 121.6, 114.8, 112.2, 95.0, 55.7, 55.3, 45.5, 43.4, 34.1, 31.9, 31.4. HRMS (ESI) Calcd. for C<sub>28</sub>H<sub>29</sub>N<sub>2</sub>O<sub>3</sub>S (M+H<sup>+</sup>)  $m/z$  473.1893, found 473.1883.

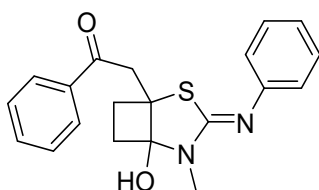

**(6e)** Yield 79% (60 mg); yellow solid; m. p. = 159–161 °C. IR (ATR)  $\nu$  3665, 3390, 2910, 1746, 1639, 1513, 1488, 1431, 1366, 1261, 1106, 1090, 1000, 935, 820 cm<sup>-1</sup>. <sup>1</sup>H NMR (600 MHz, CDCl<sub>3</sub>)  $\delta$  7.84 – 7.83 (m, 2H), 7.58 – 7.56 (m, 1H), 7.44 – 7.41 (m,



2H), 7.19 – 7.17 (m, 2H), 7.01 – 6.98 (m, 2H), 6.95 – 6.92 (m, 1H), 4.76 (br s, 1H), 3.78 (d,  $J = 18.0$  Hz, 1H), 3.29 (d,  $J = 18.0$  Hz, 1H), 3.13 (s, 3H), 2.53 – 2.48 (m, 1H), 2.37 – 2.31 (m, 1H), 2.17 – 2.14 (m, 2H).  $^{13}\text{C}$  NMR (151 MHz,  $\text{CDCl}_3$ )  $\delta$  198.0, 159.7, 136.4, 133.8, 128.8, 128.7, 128.4, 123.6, 123.0, 95.1, 55.4, 43.3, 31.4, 30.8. HRMS (ESI) Calcd. for  $\text{C}_{20}\text{H}_{21}\text{N}_2\text{O}_2\text{S}$  ( $\text{M}+\text{H}^+$ )  $m/z$  353.1318, found 353.1324.

### Large scale synthesis of **5a**

A solution of **3a** (1.3 mmol) and **4a** (1.3 mmol) in EtOAc (12 mL) was stirred in a sealed tube reactor at reflux for 8 h. The crude mixture, without aqueous work-up, was directly purified by flash column chromatography ( $\text{SiO}_2$ , petroleum ether/ether = 5:1 $\rightarrow$ 1:1) to give 265 mg of compound **5a** (78% yield).

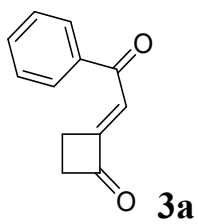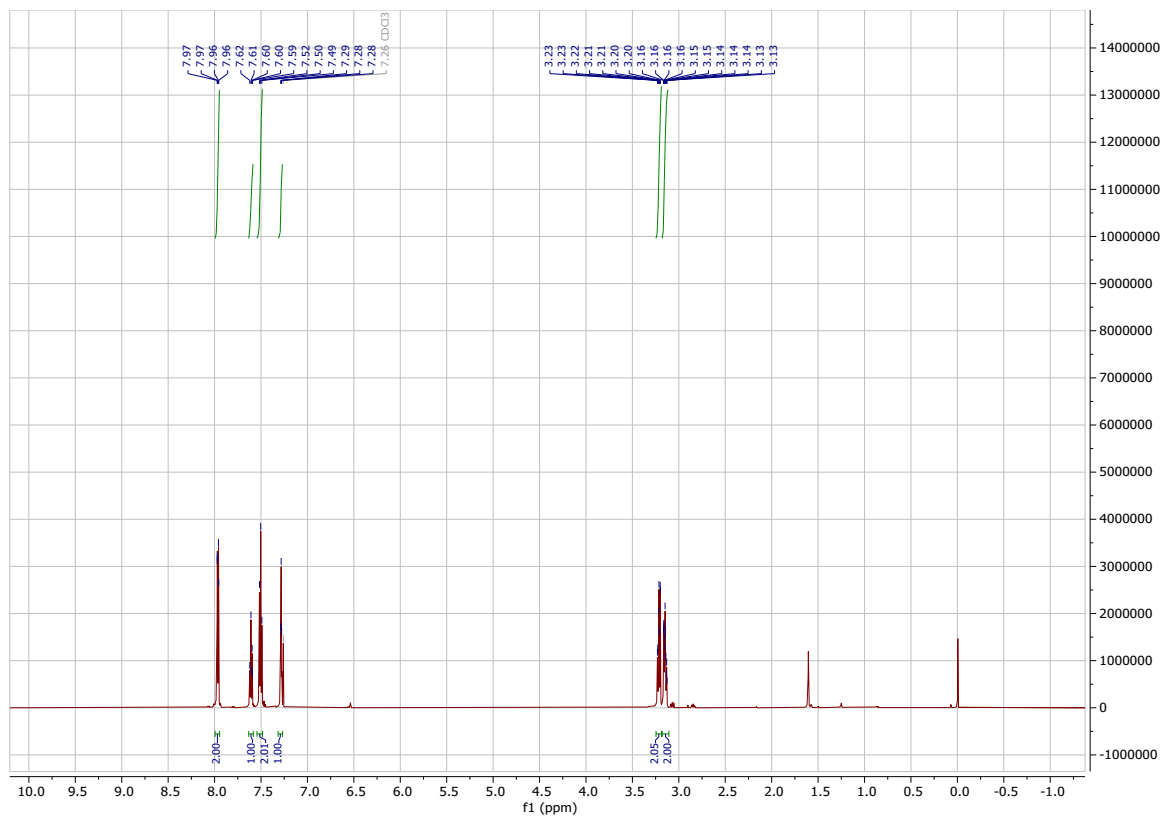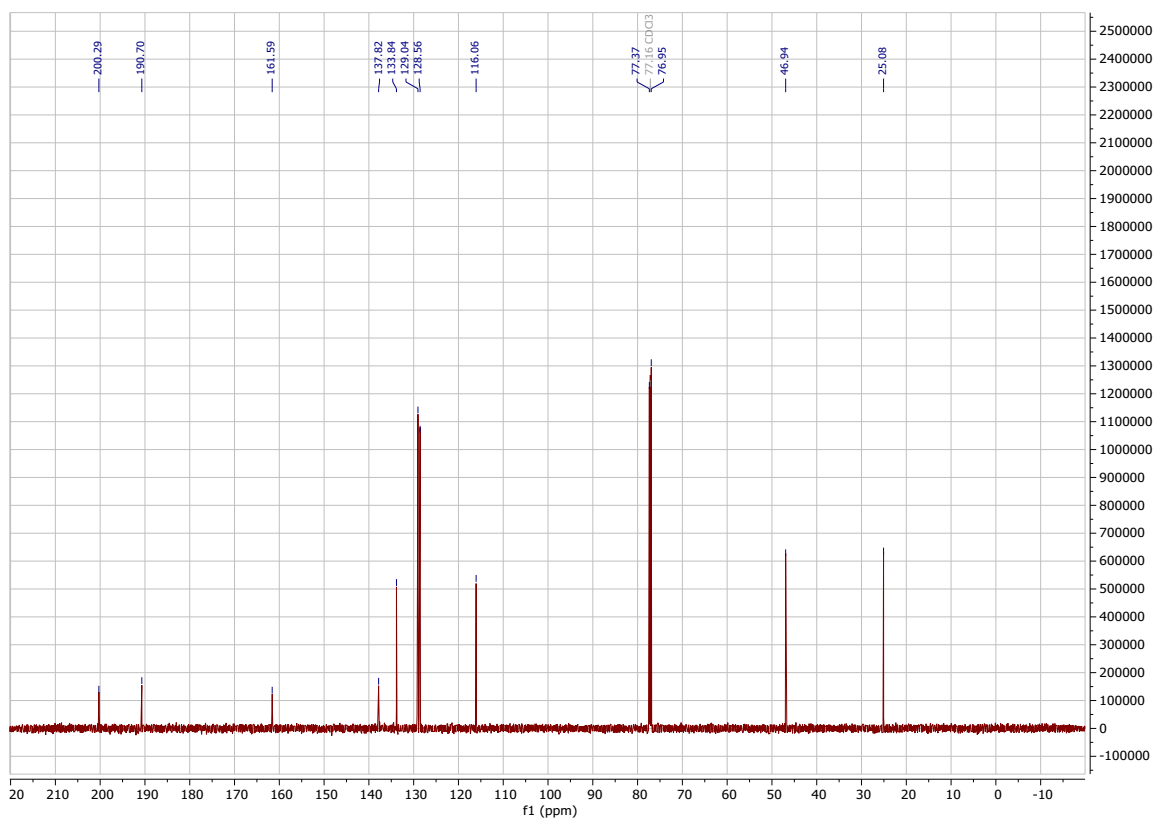

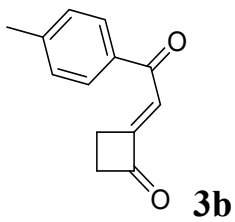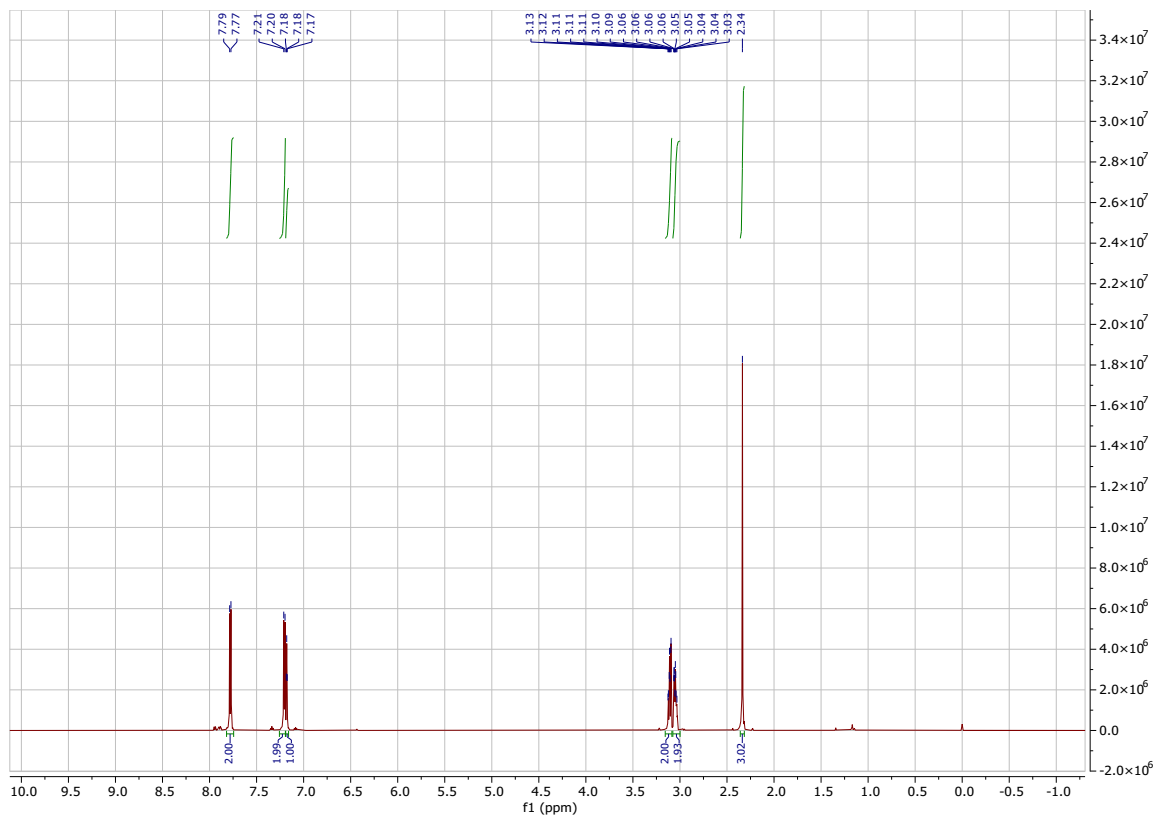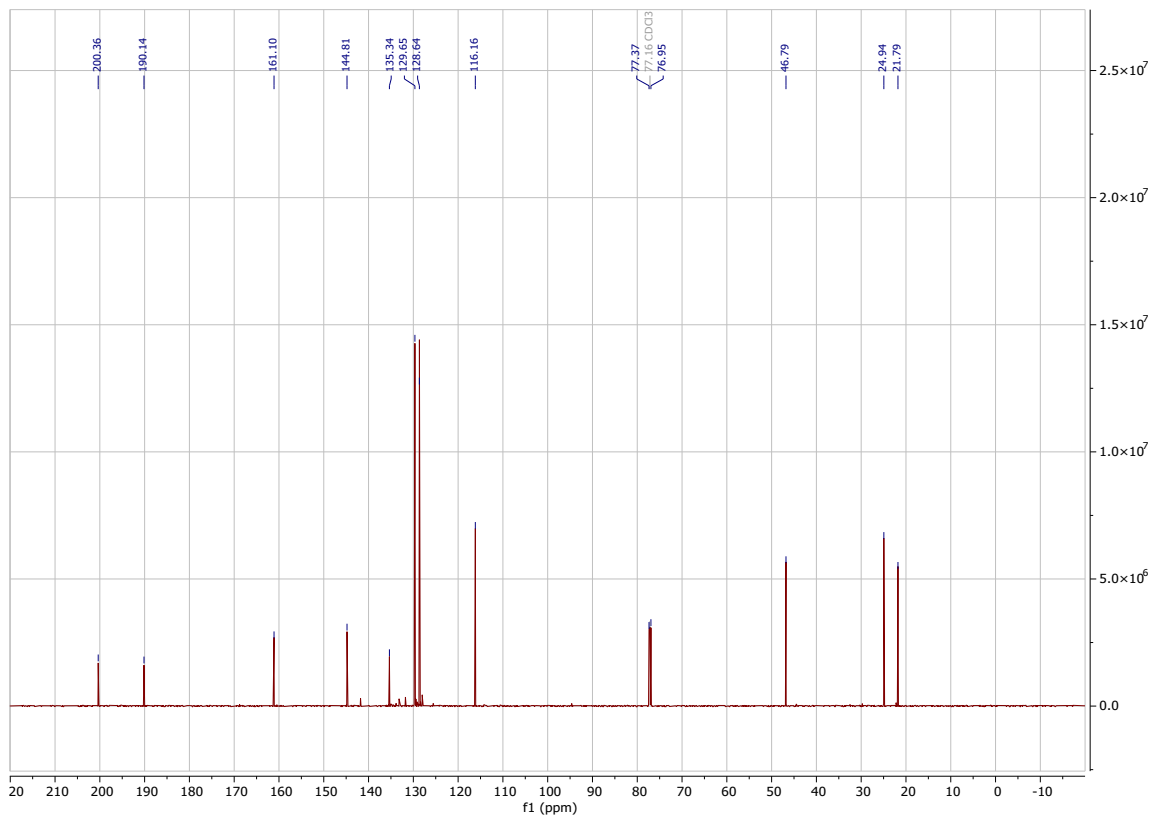

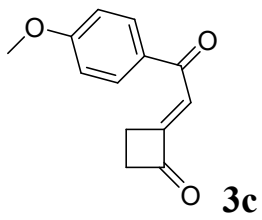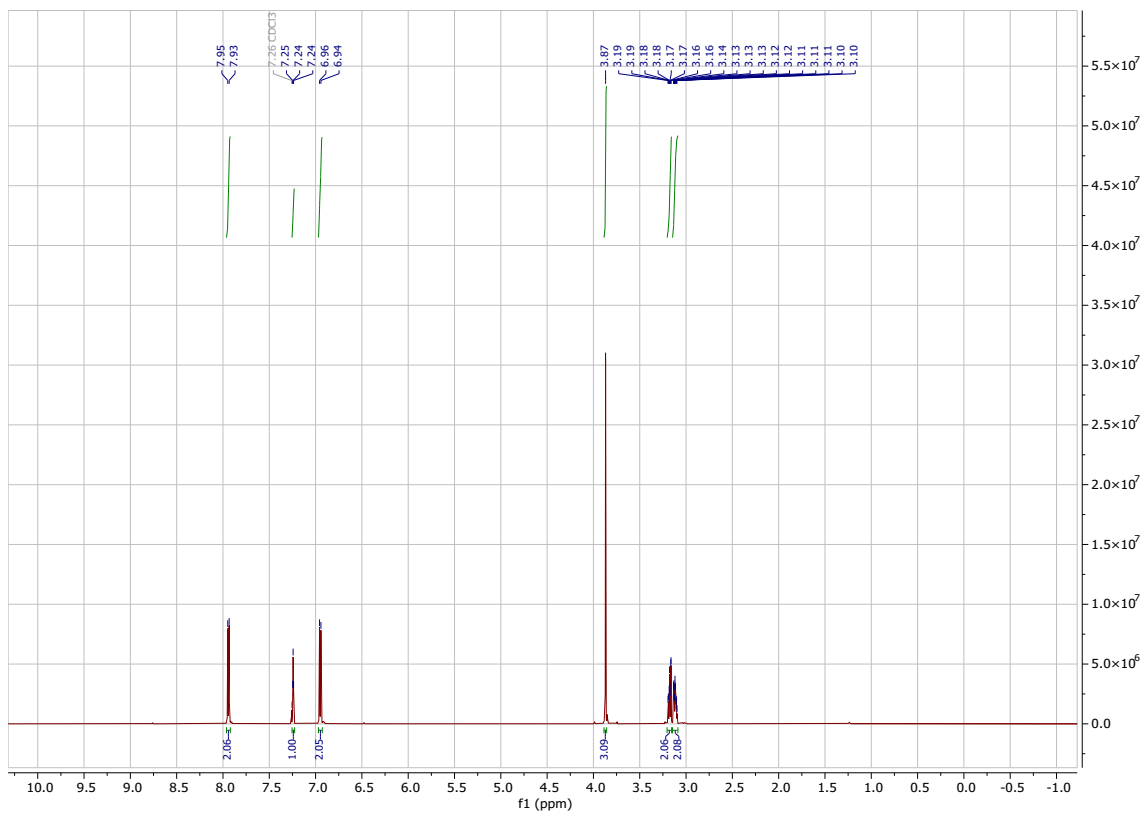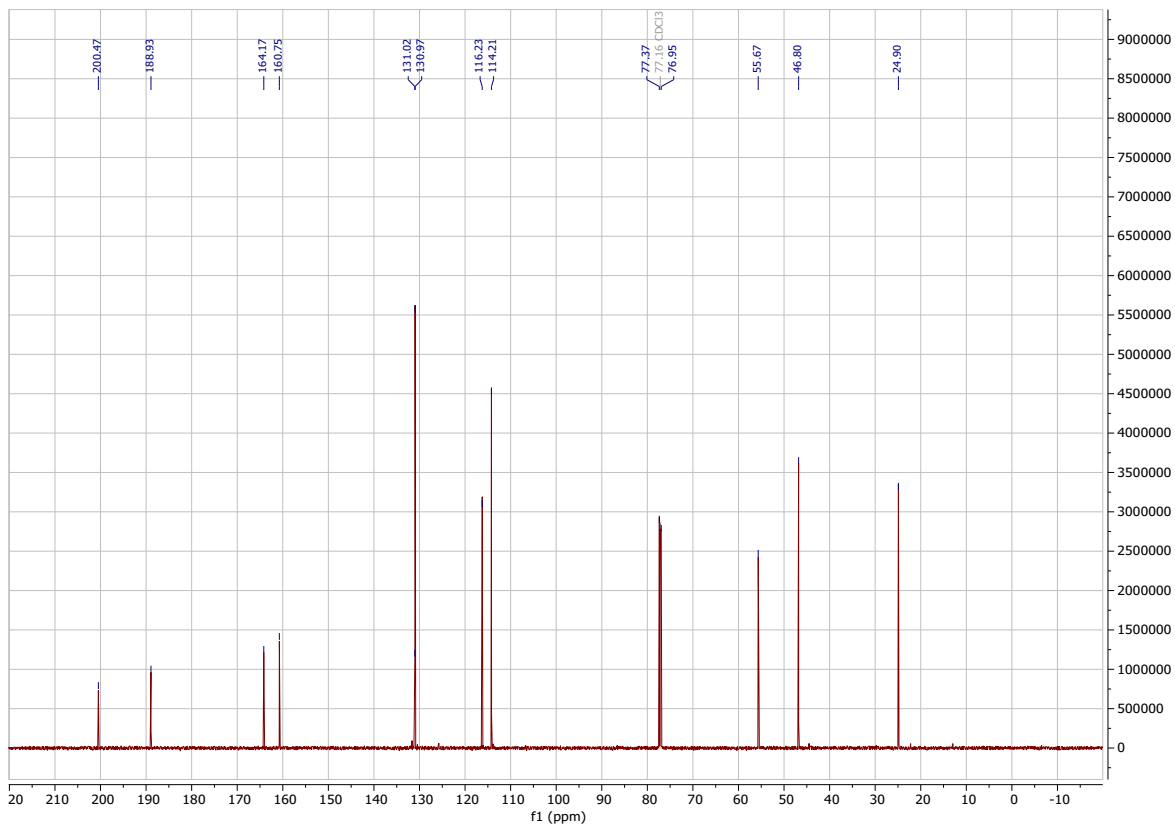

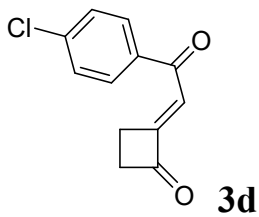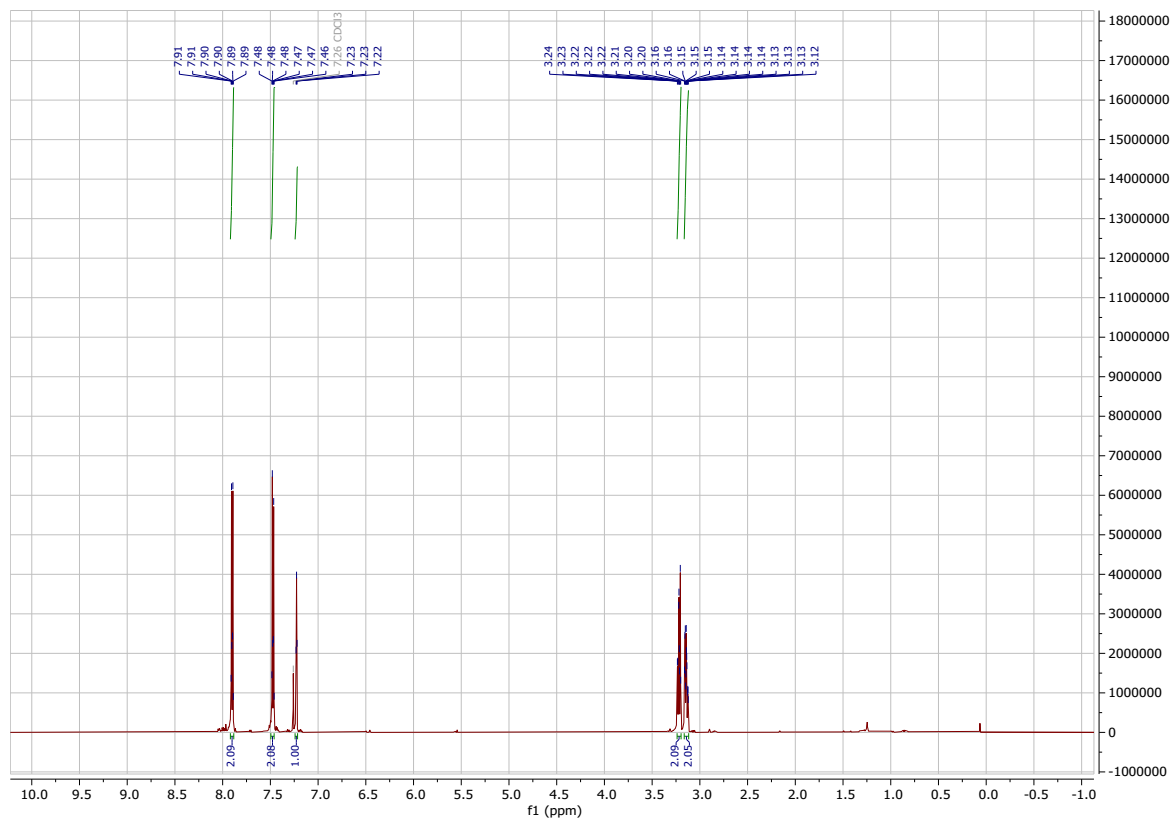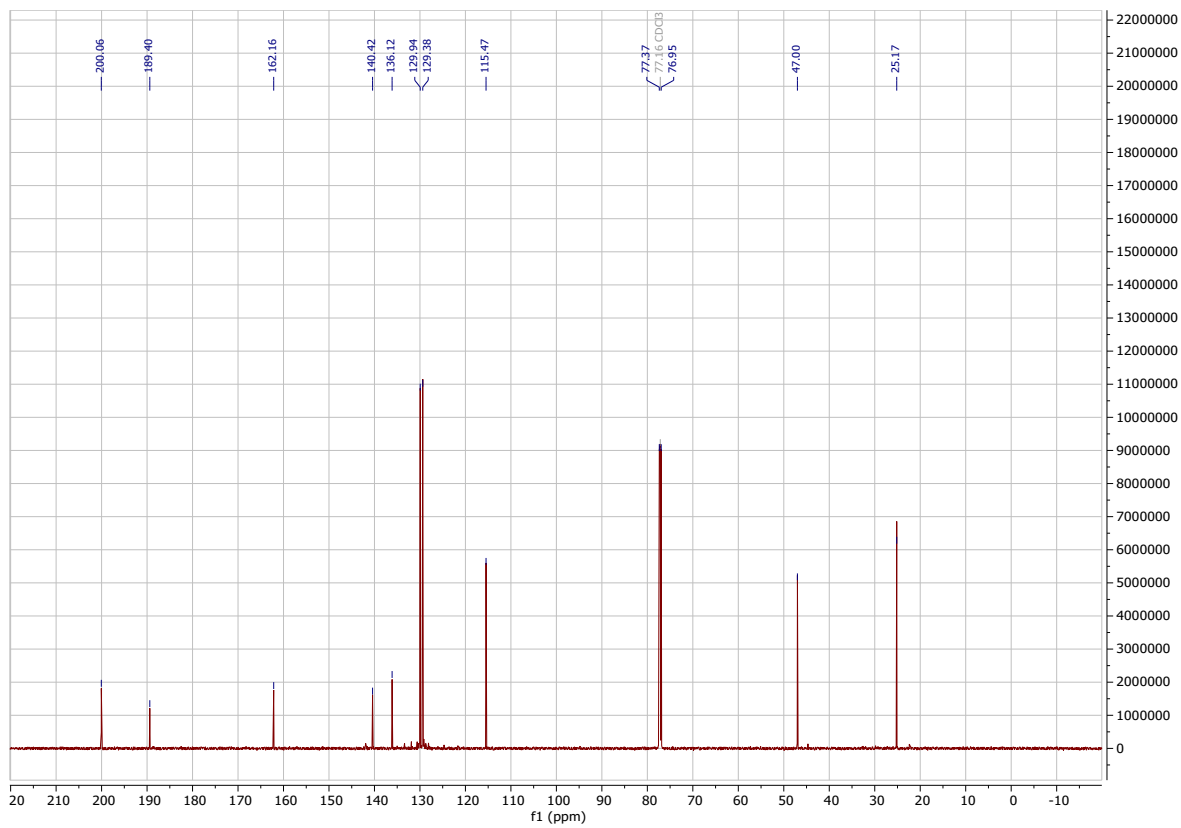

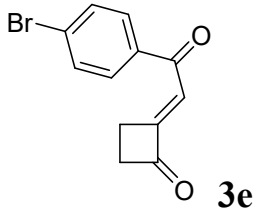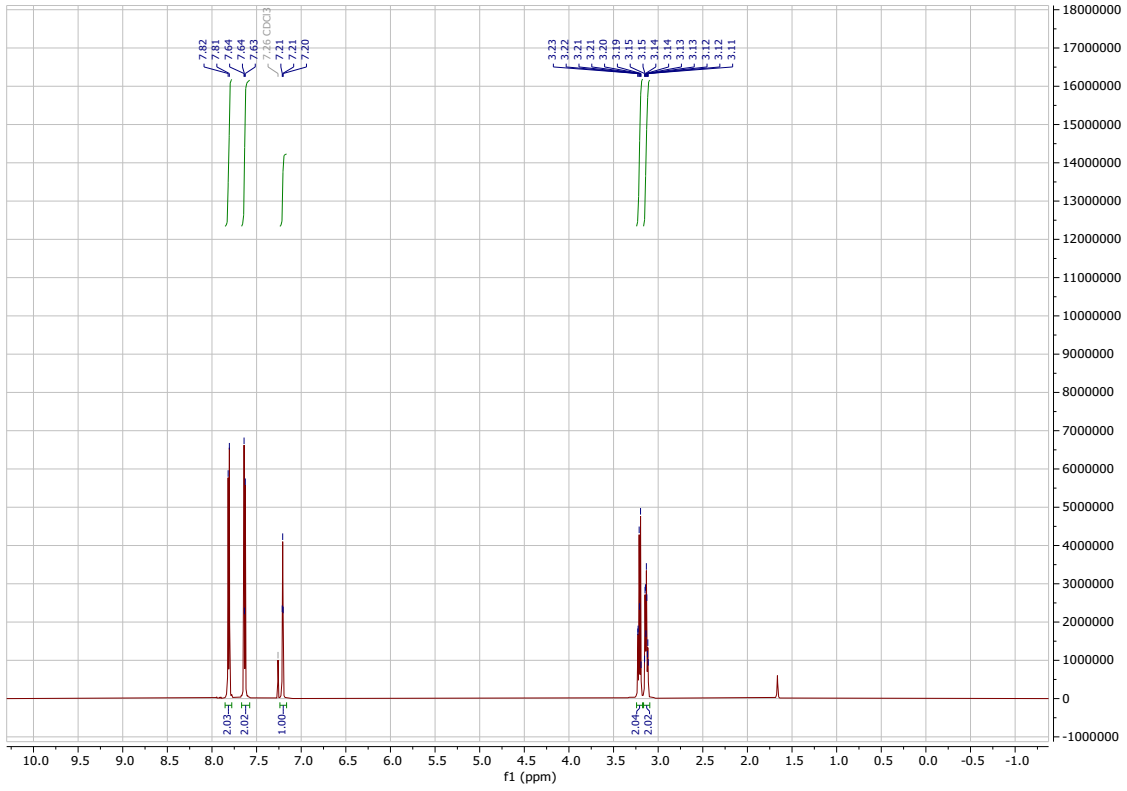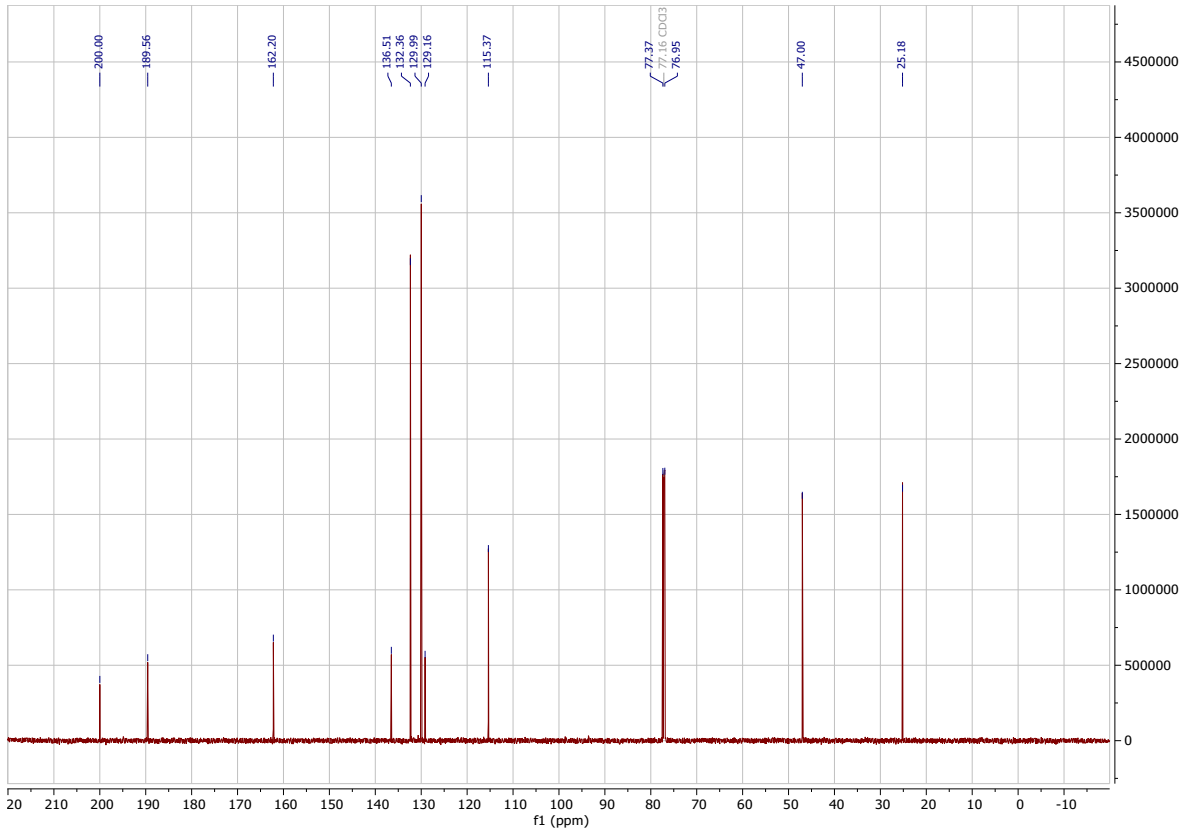

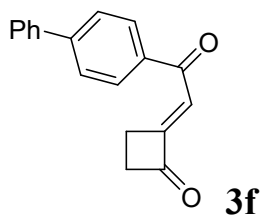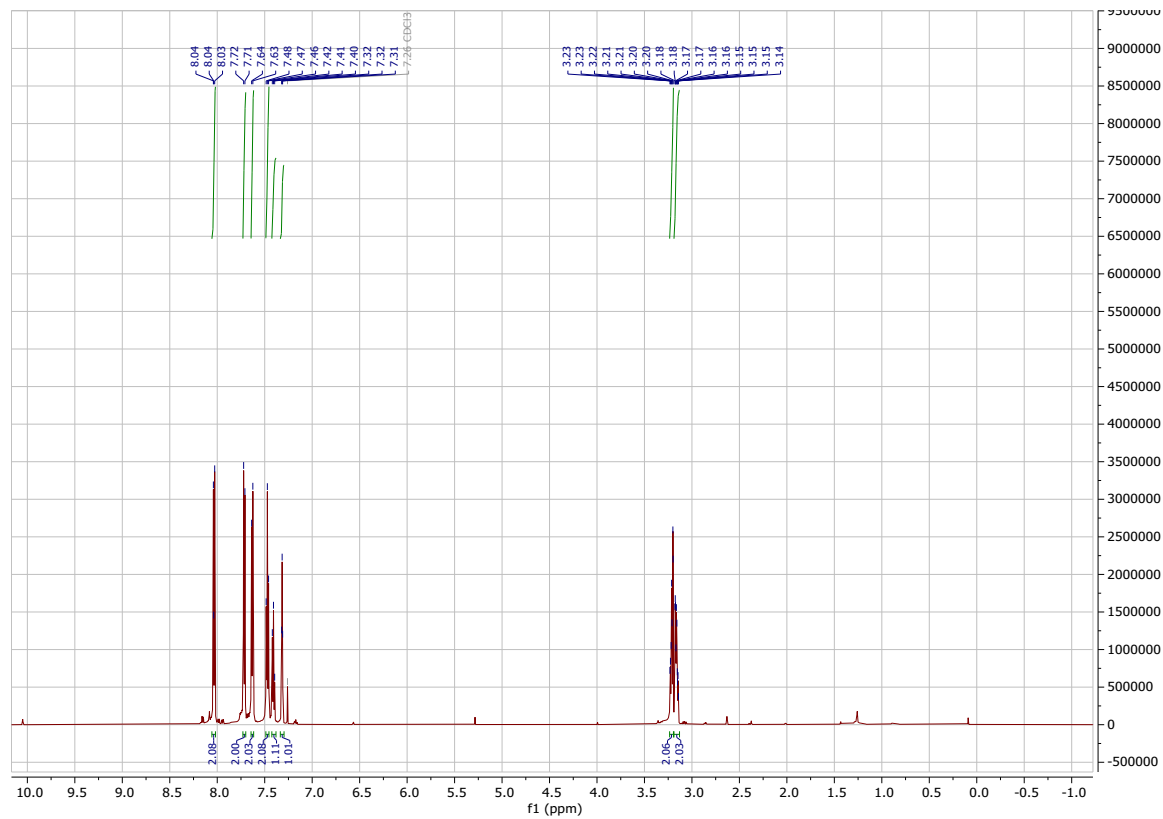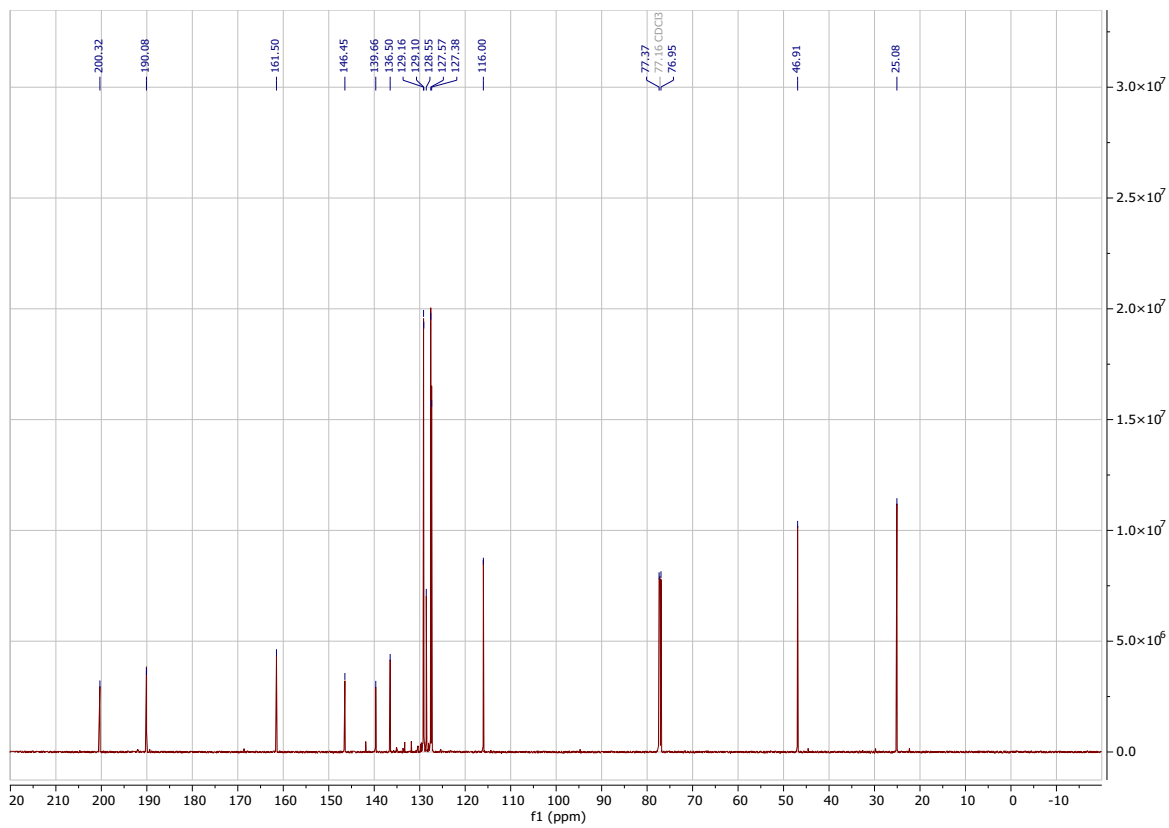

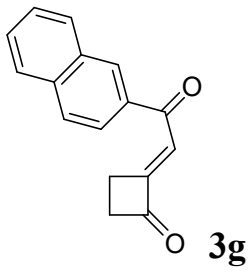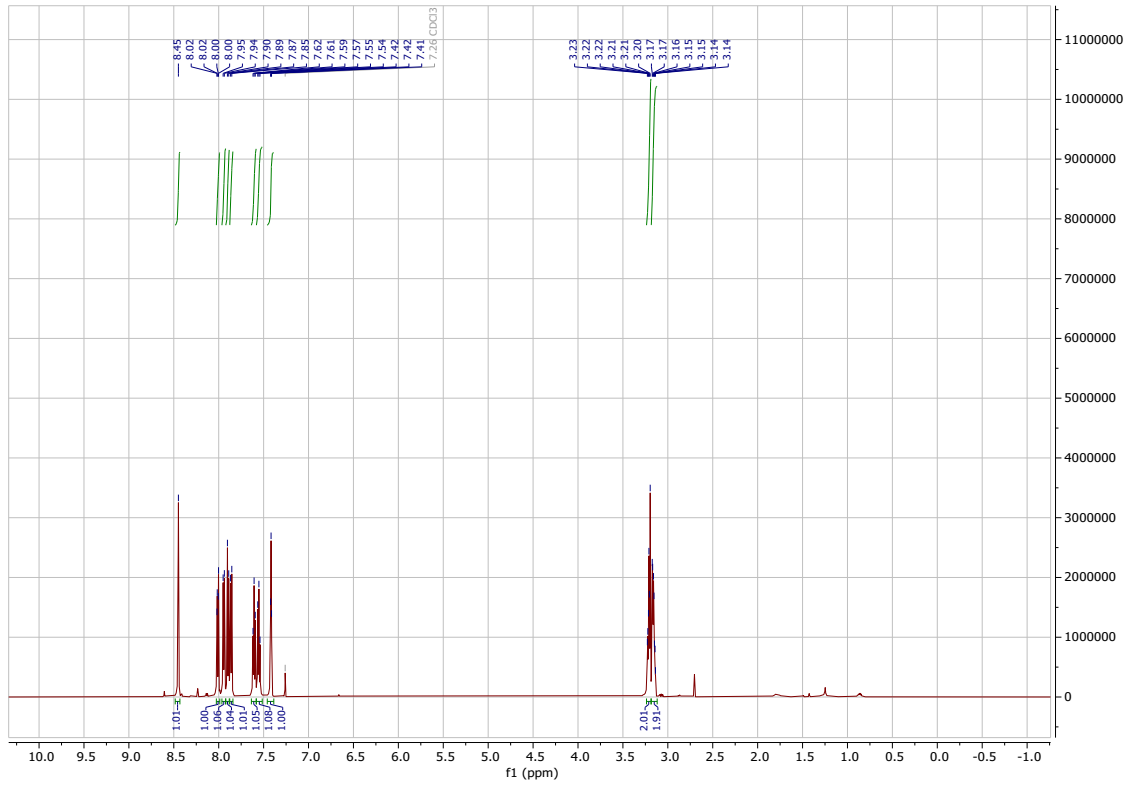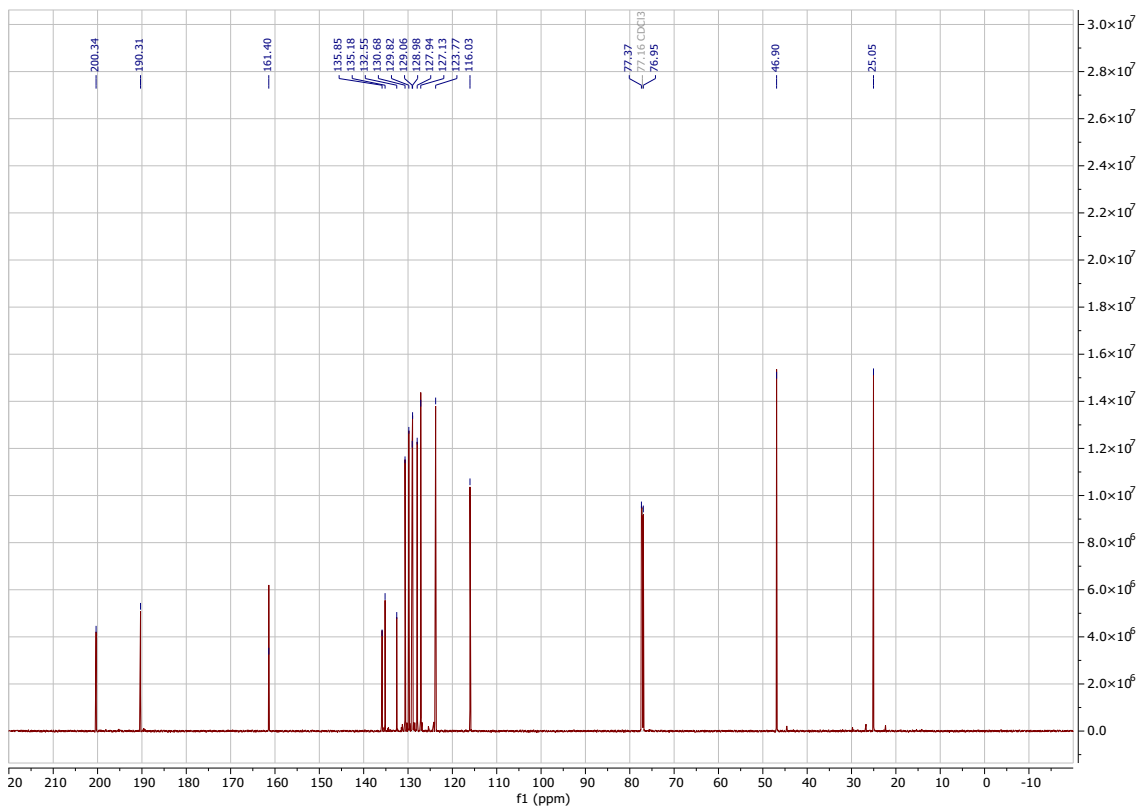



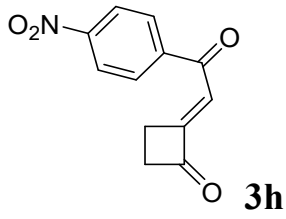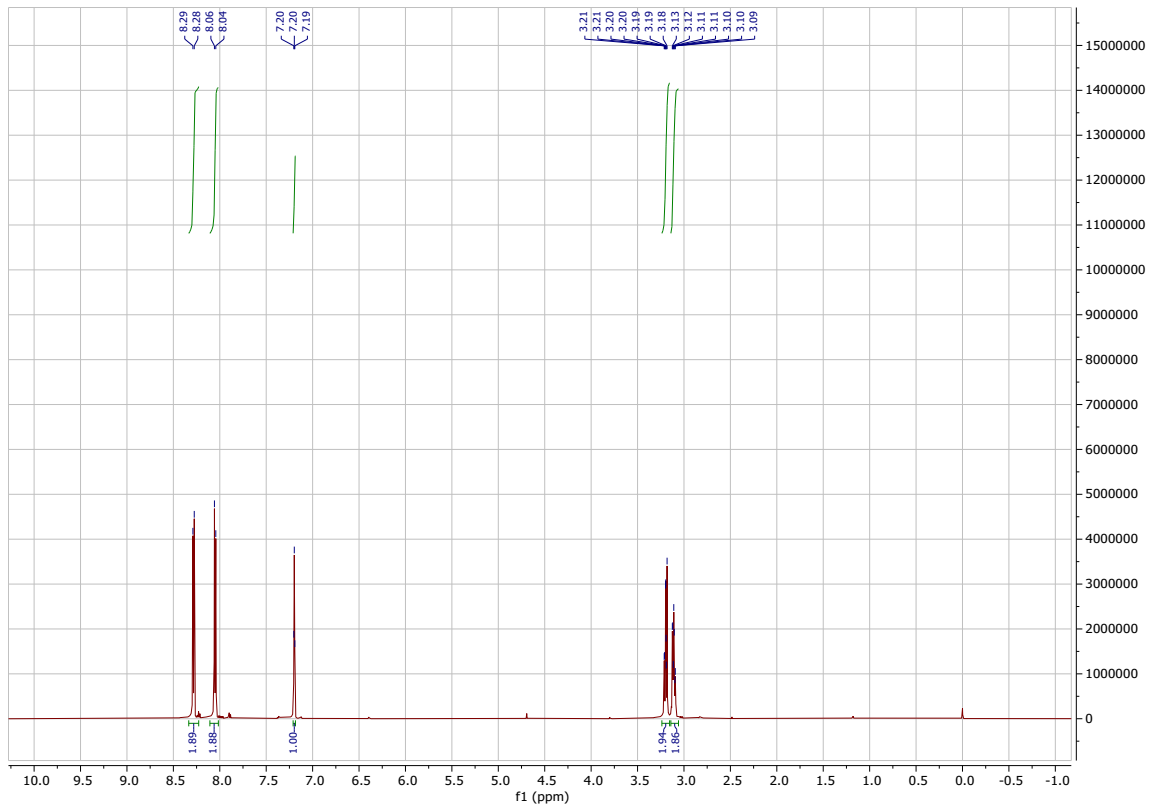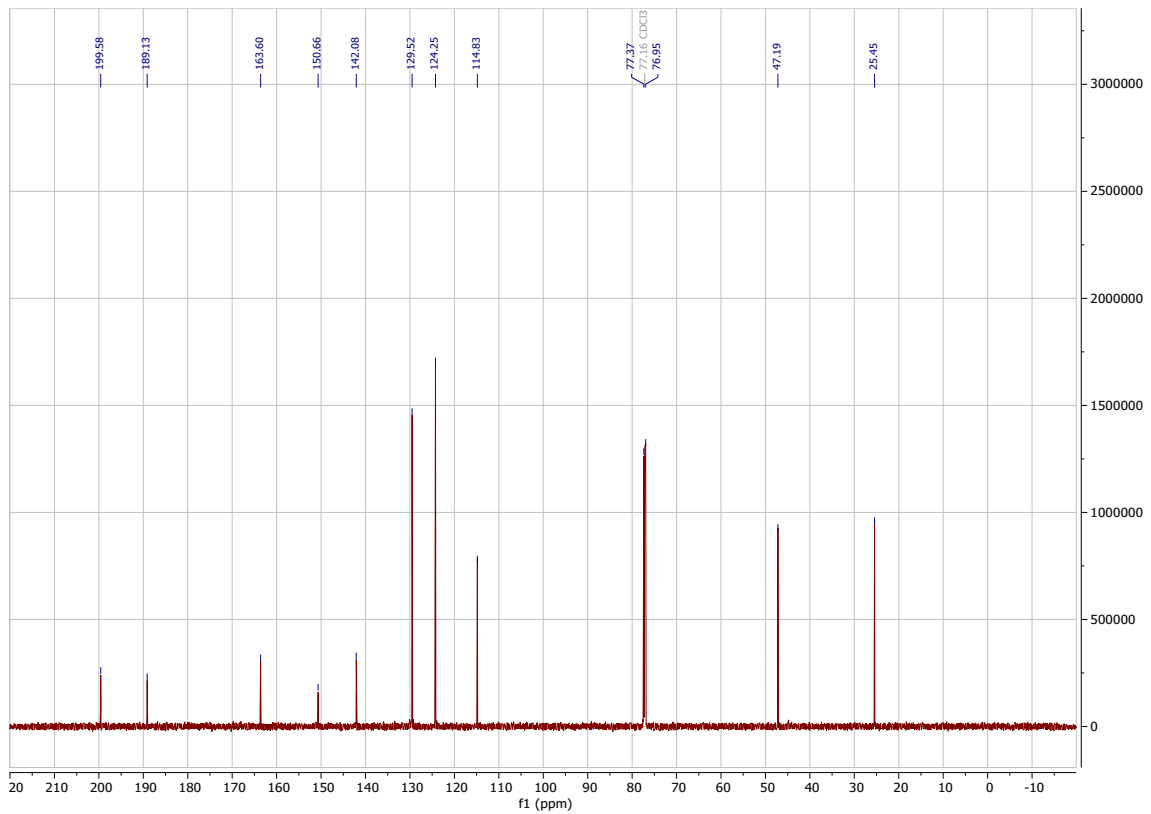

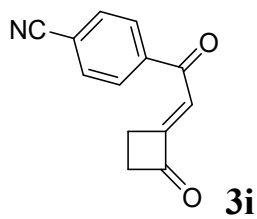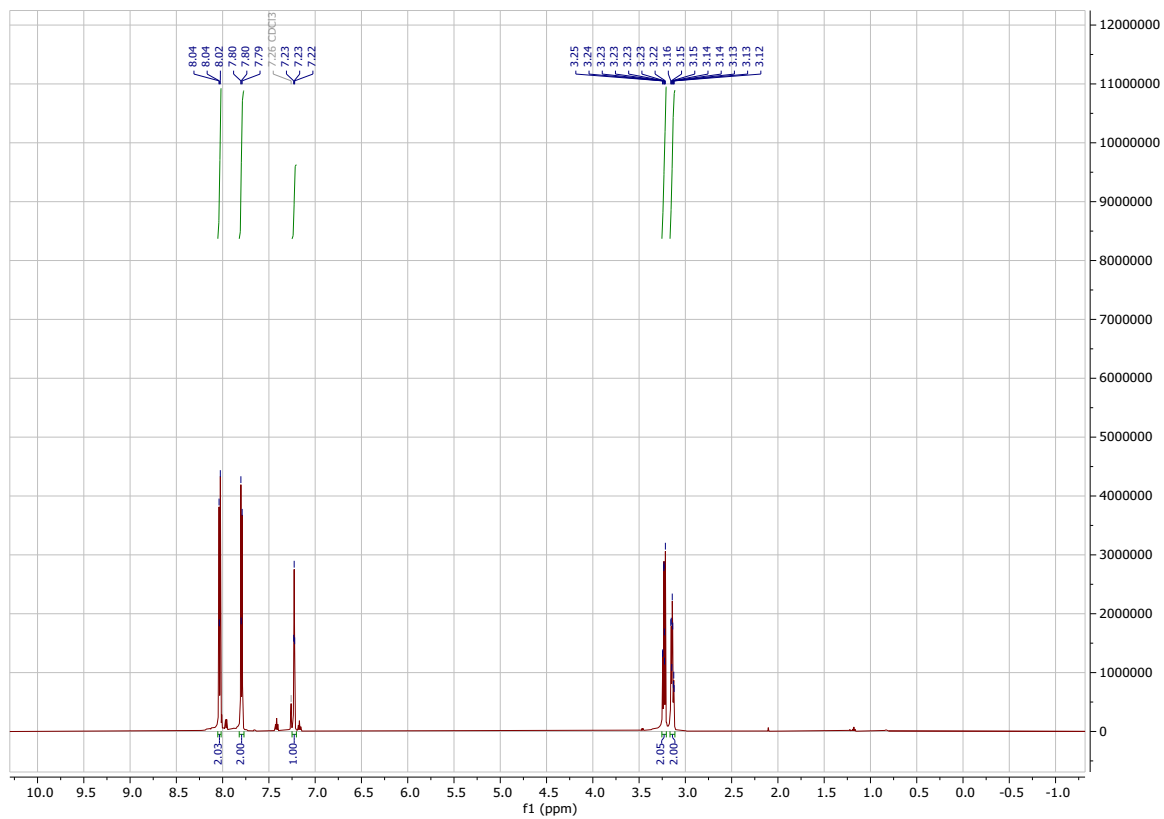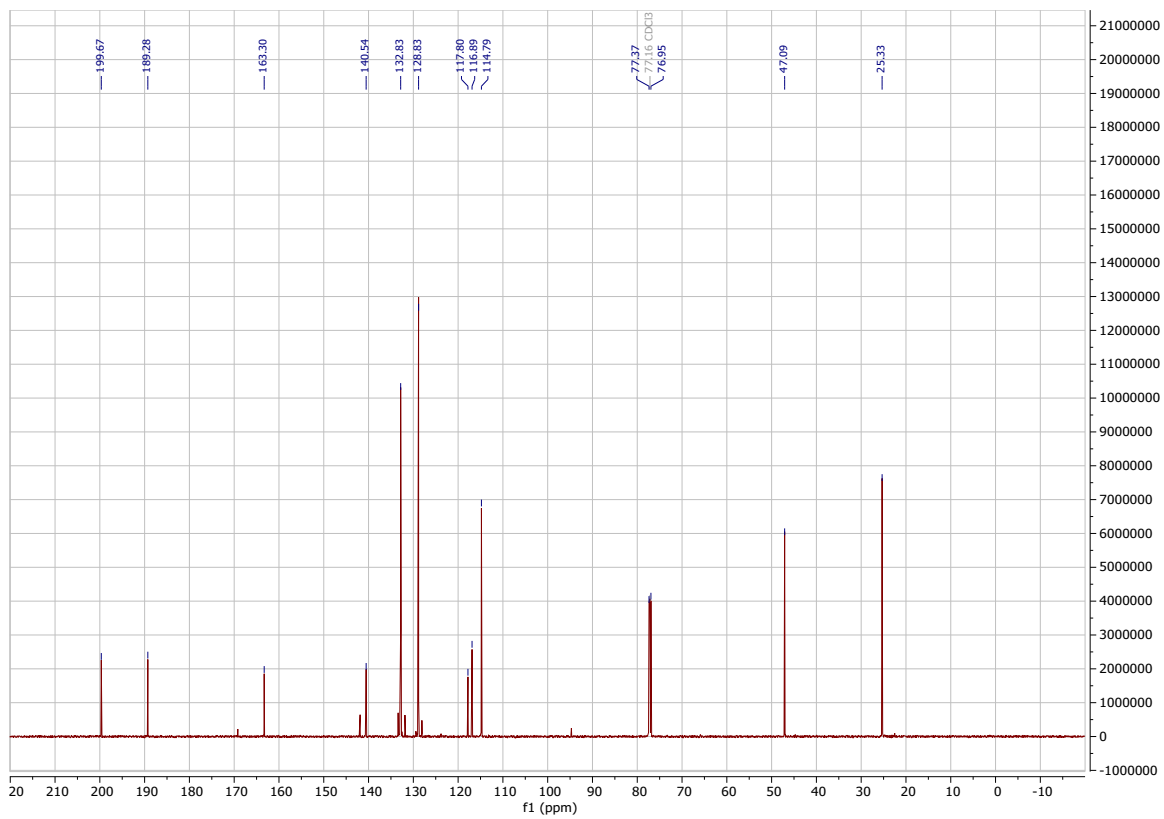

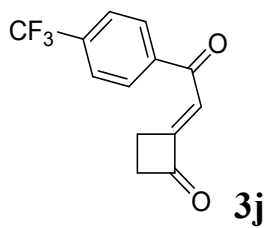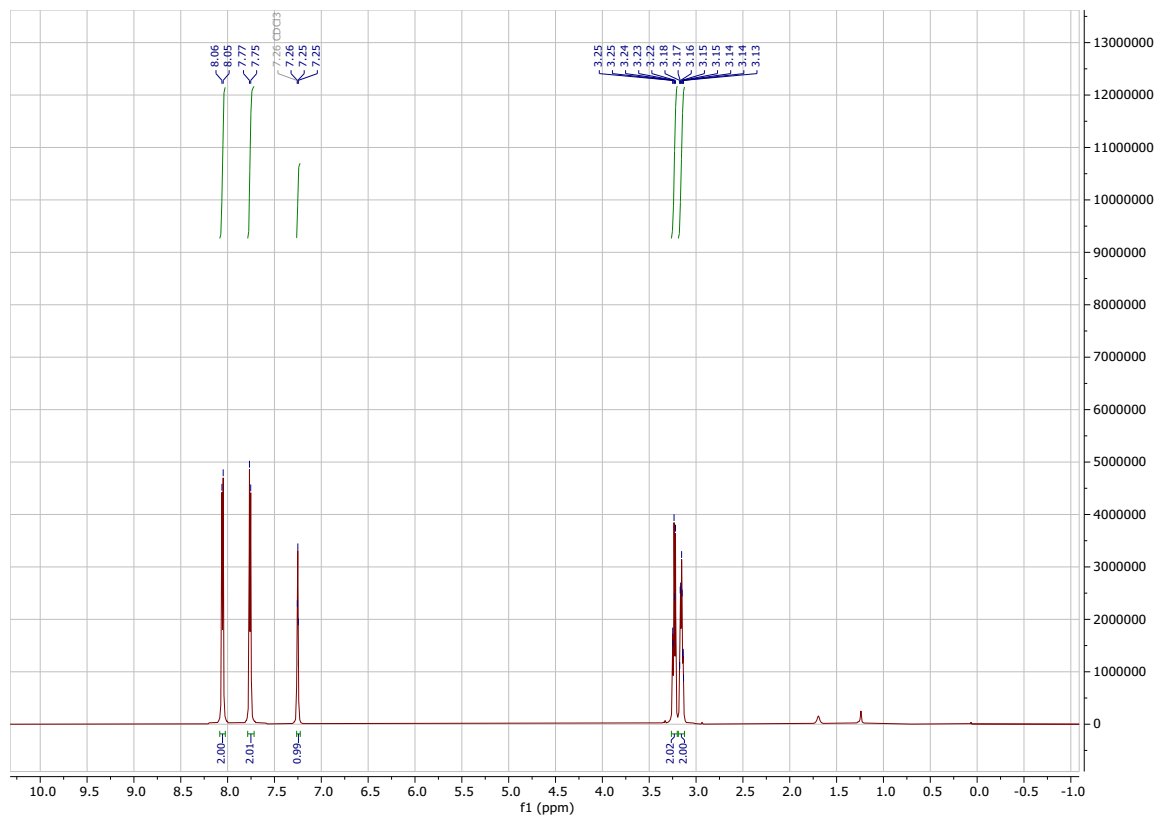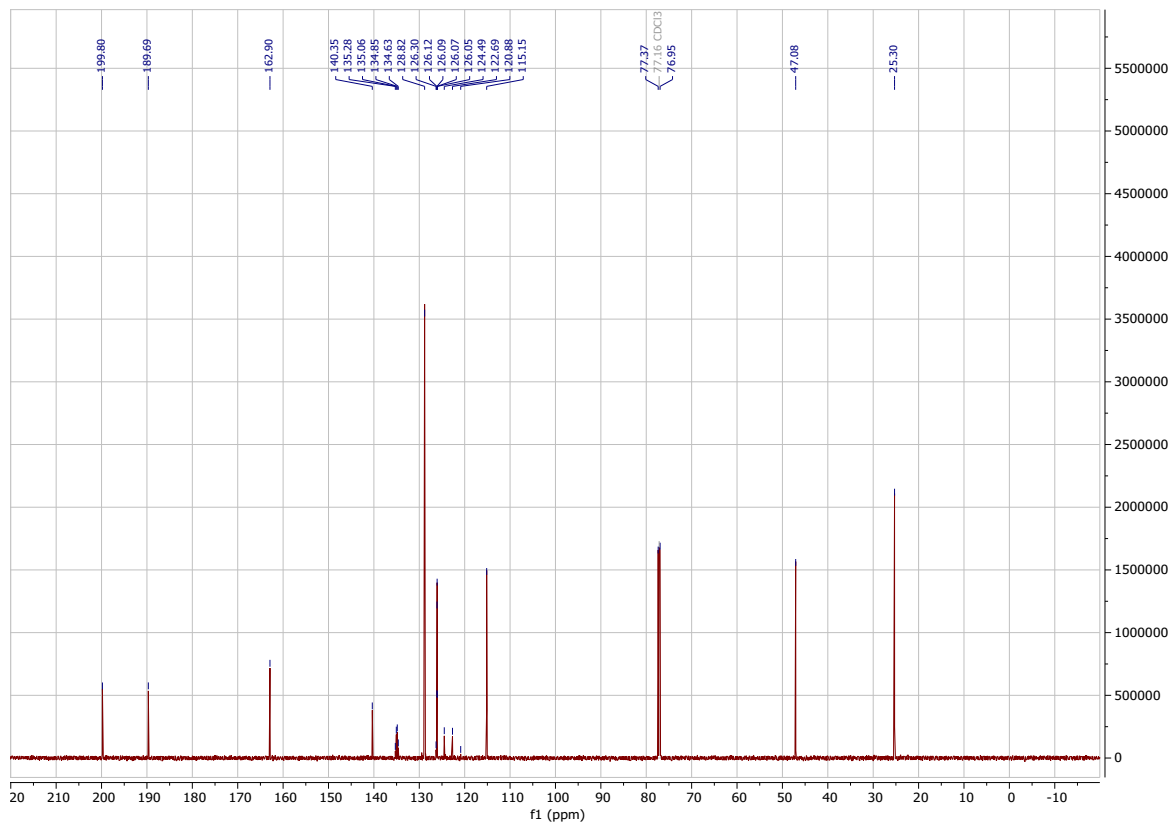

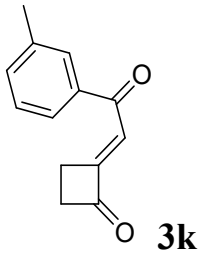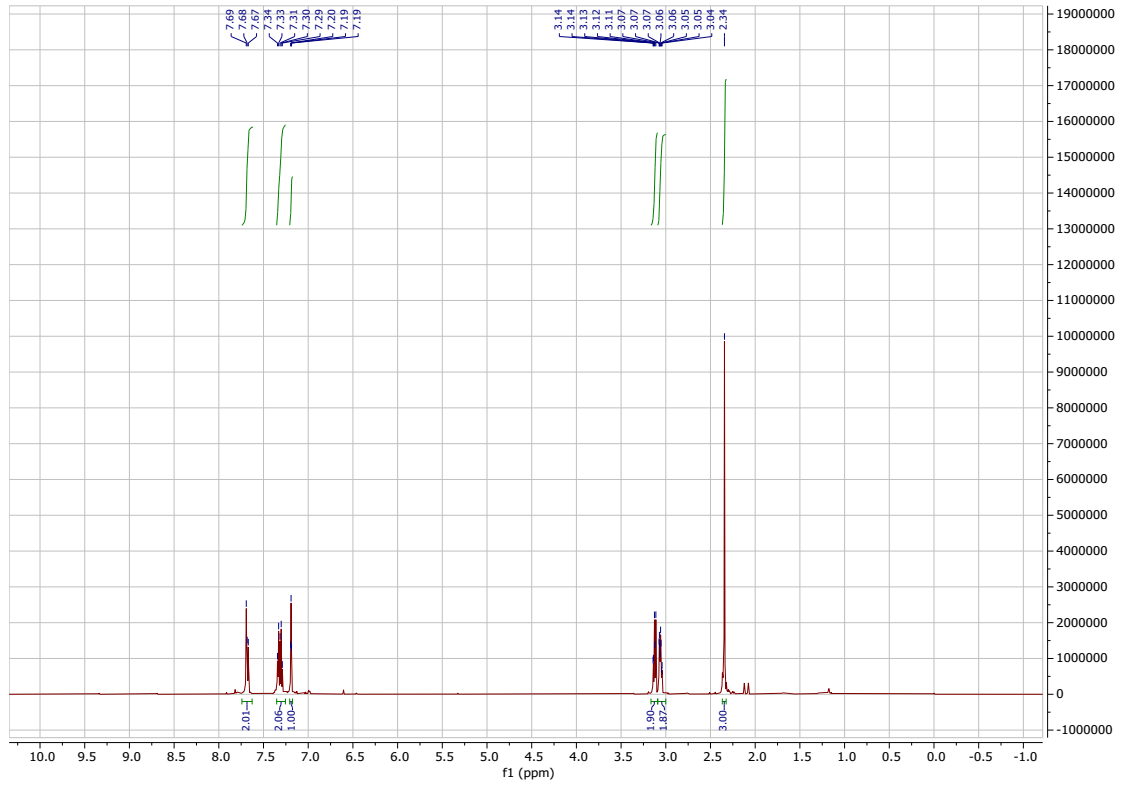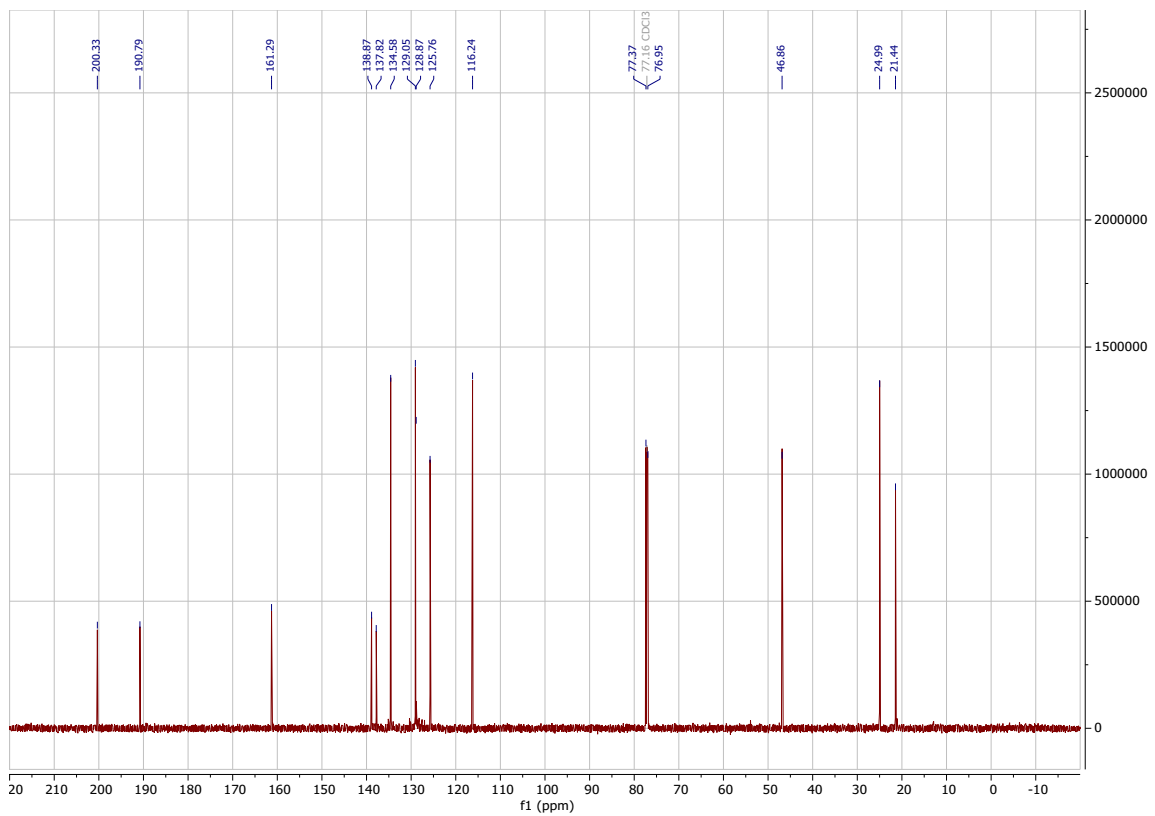

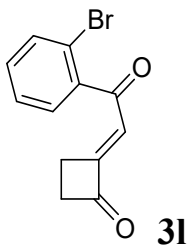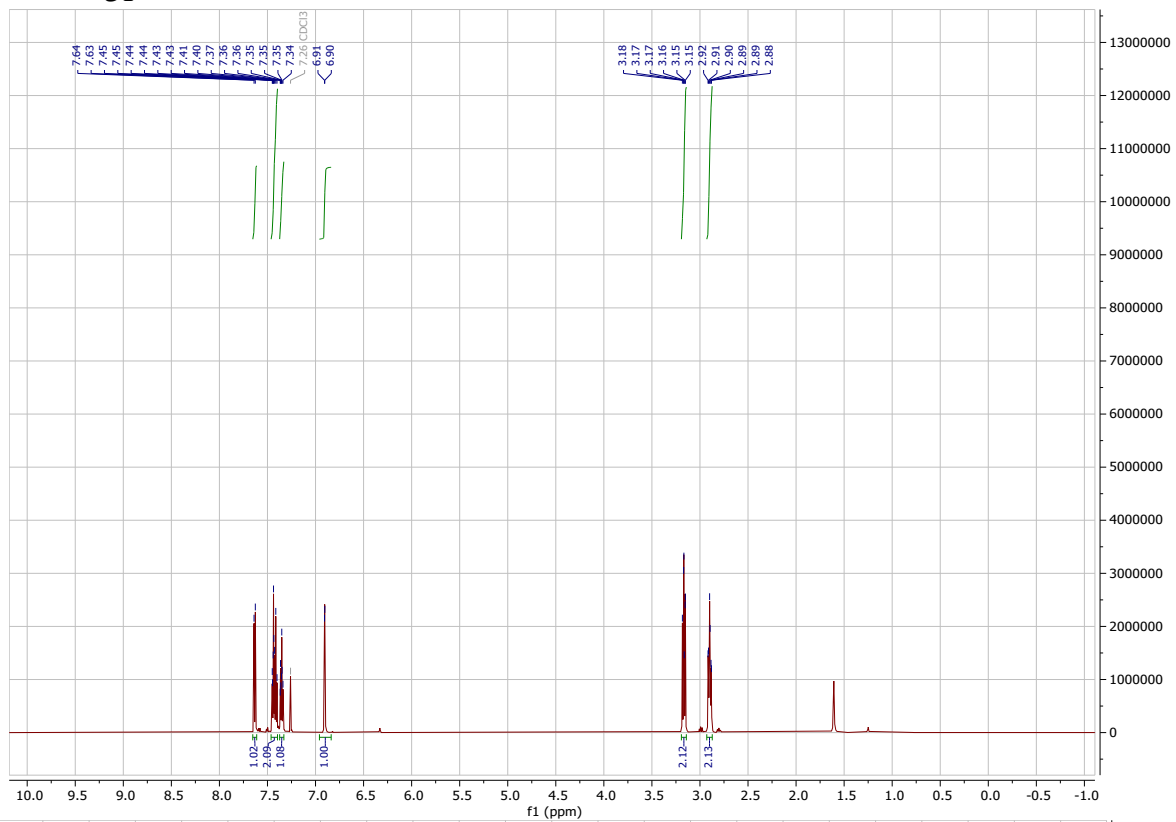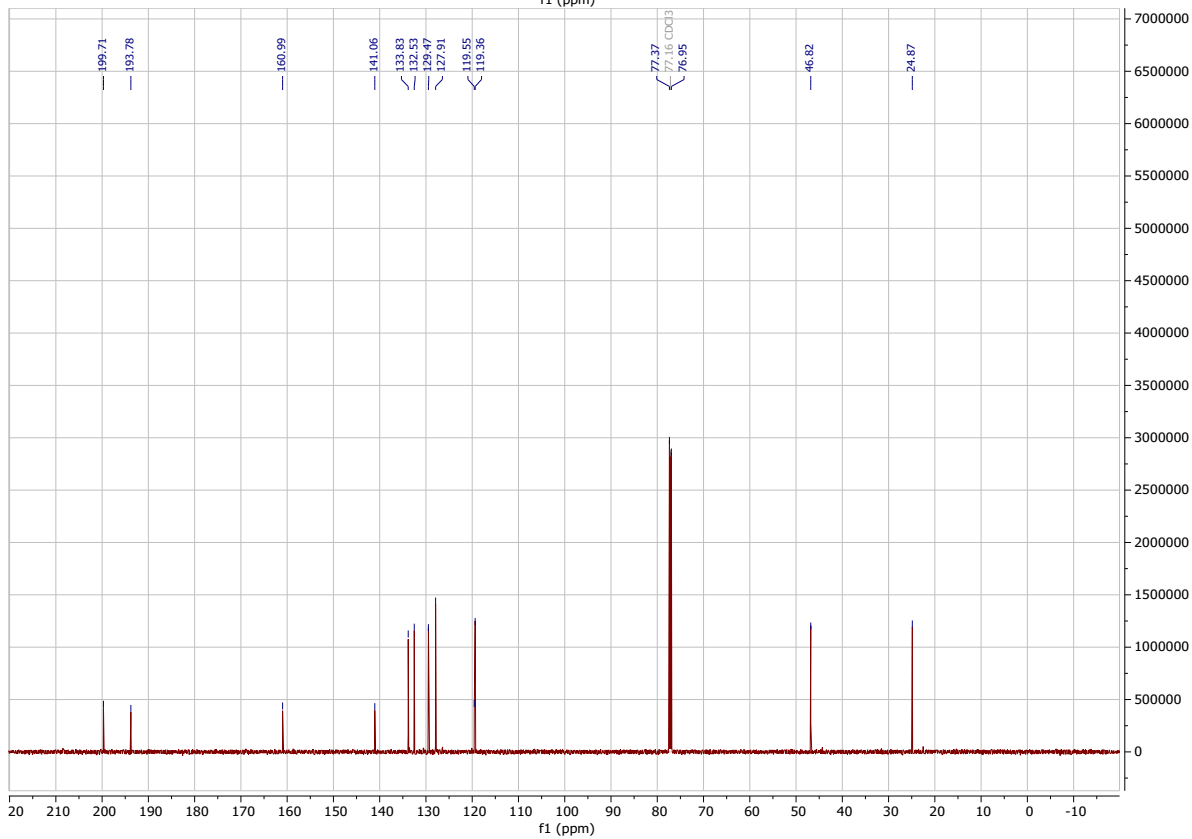

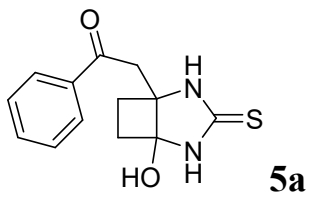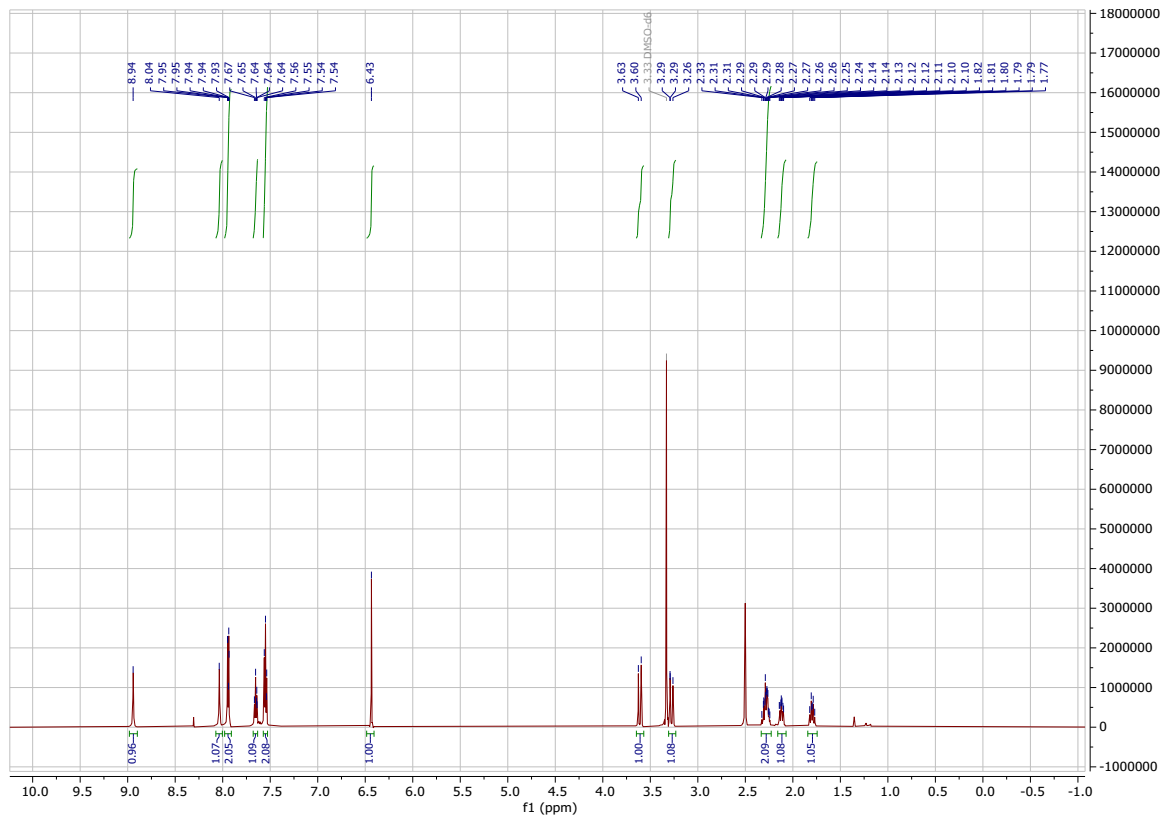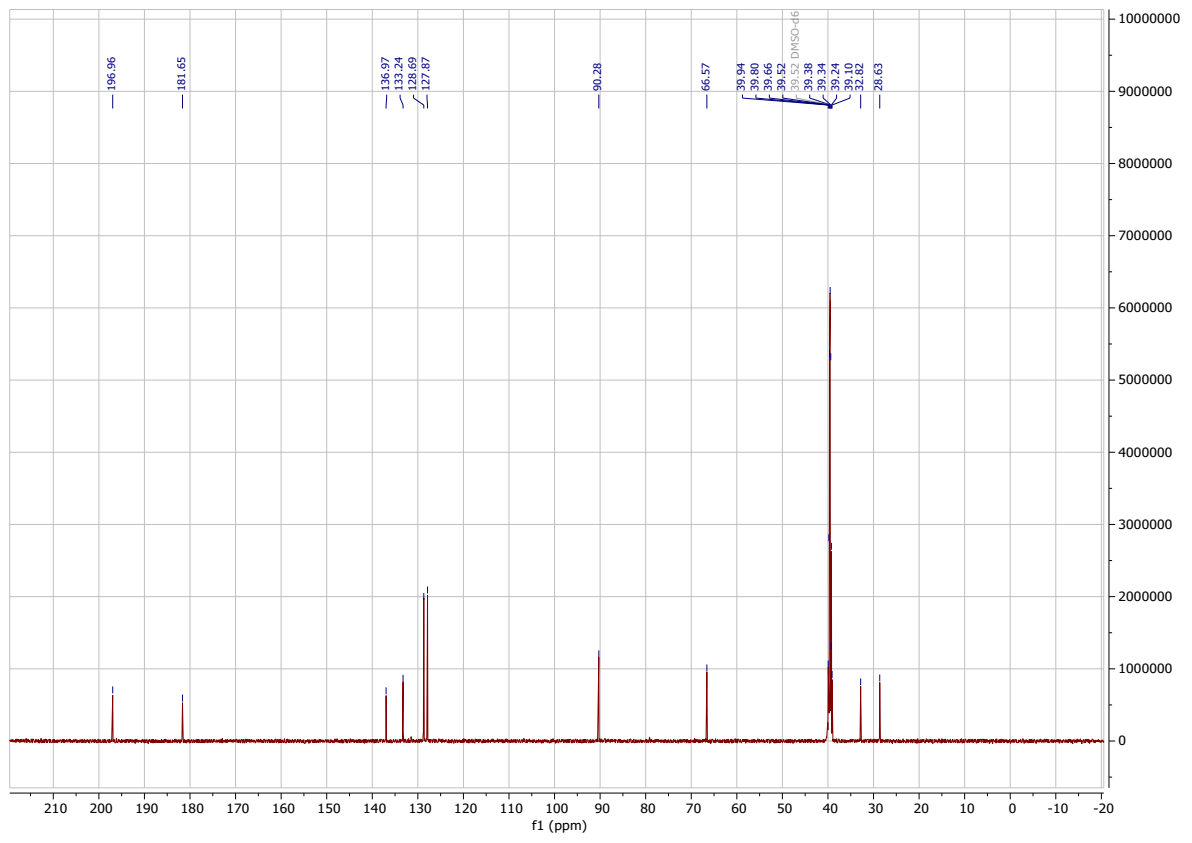

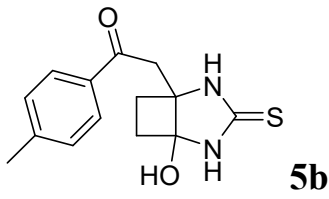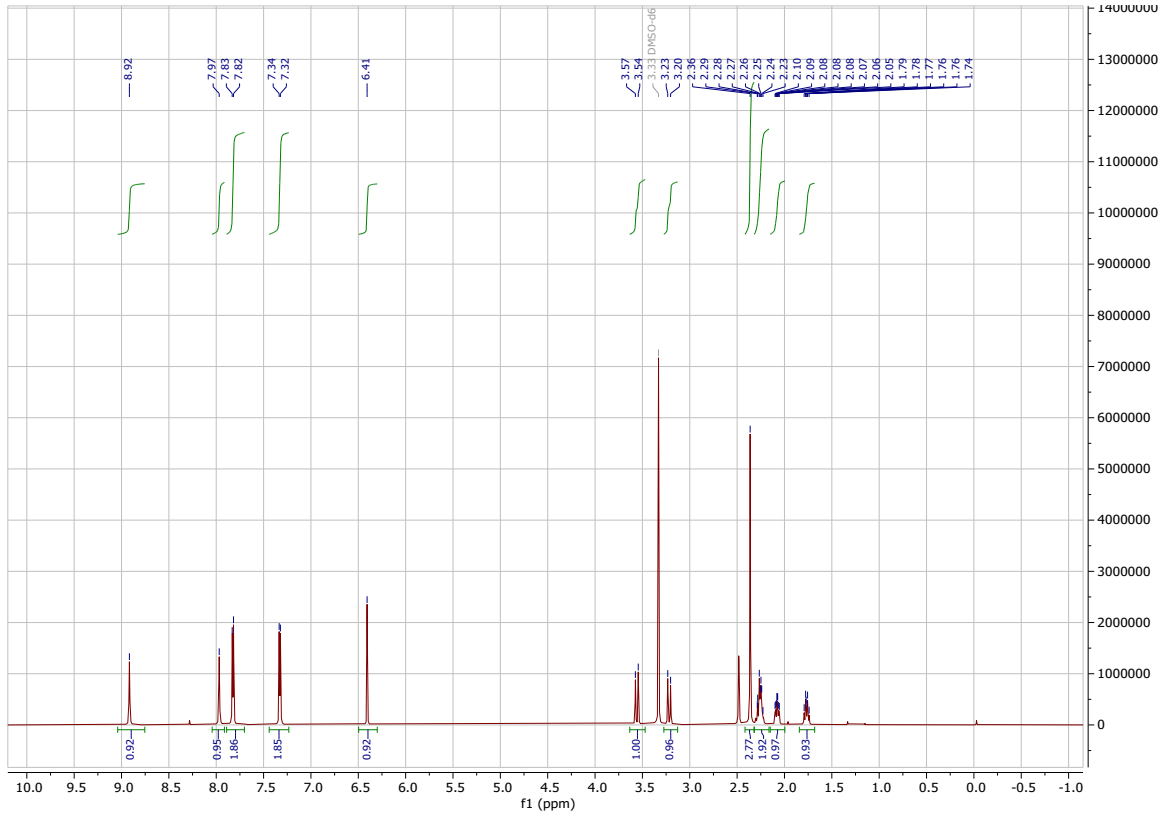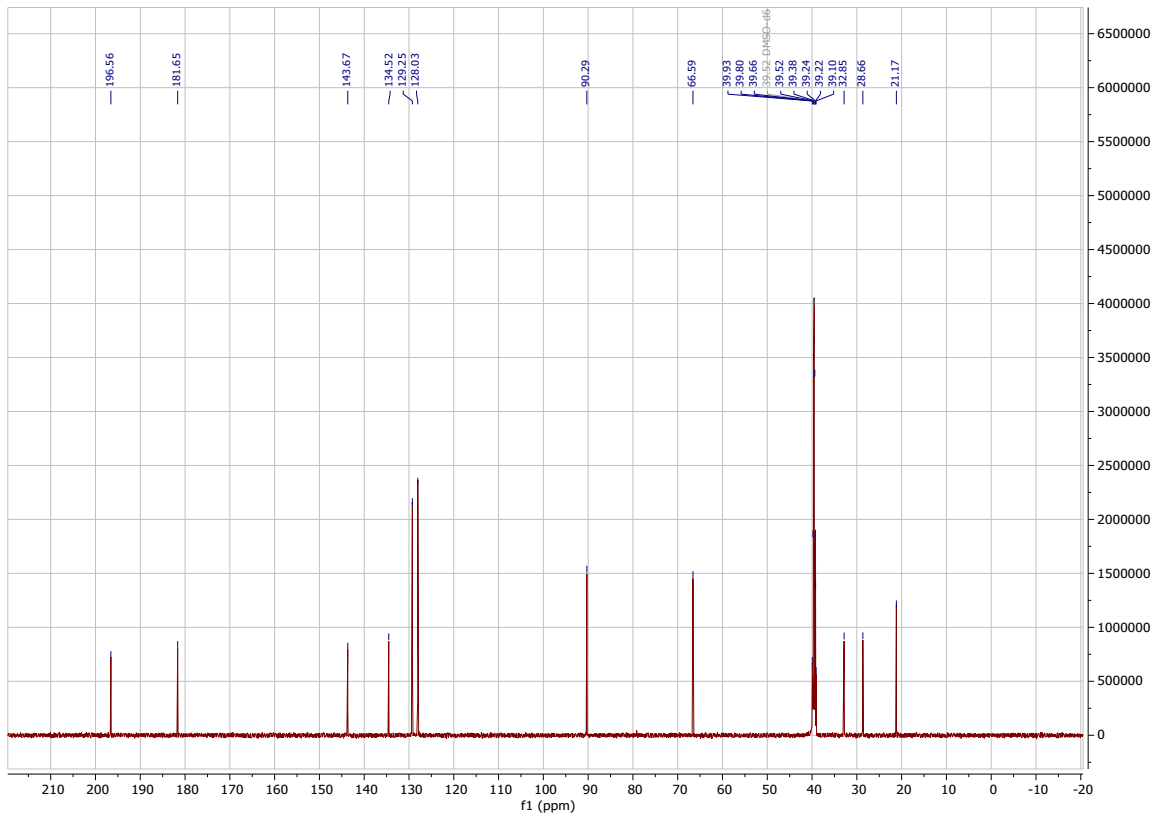

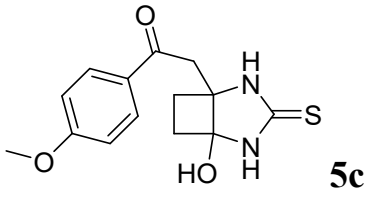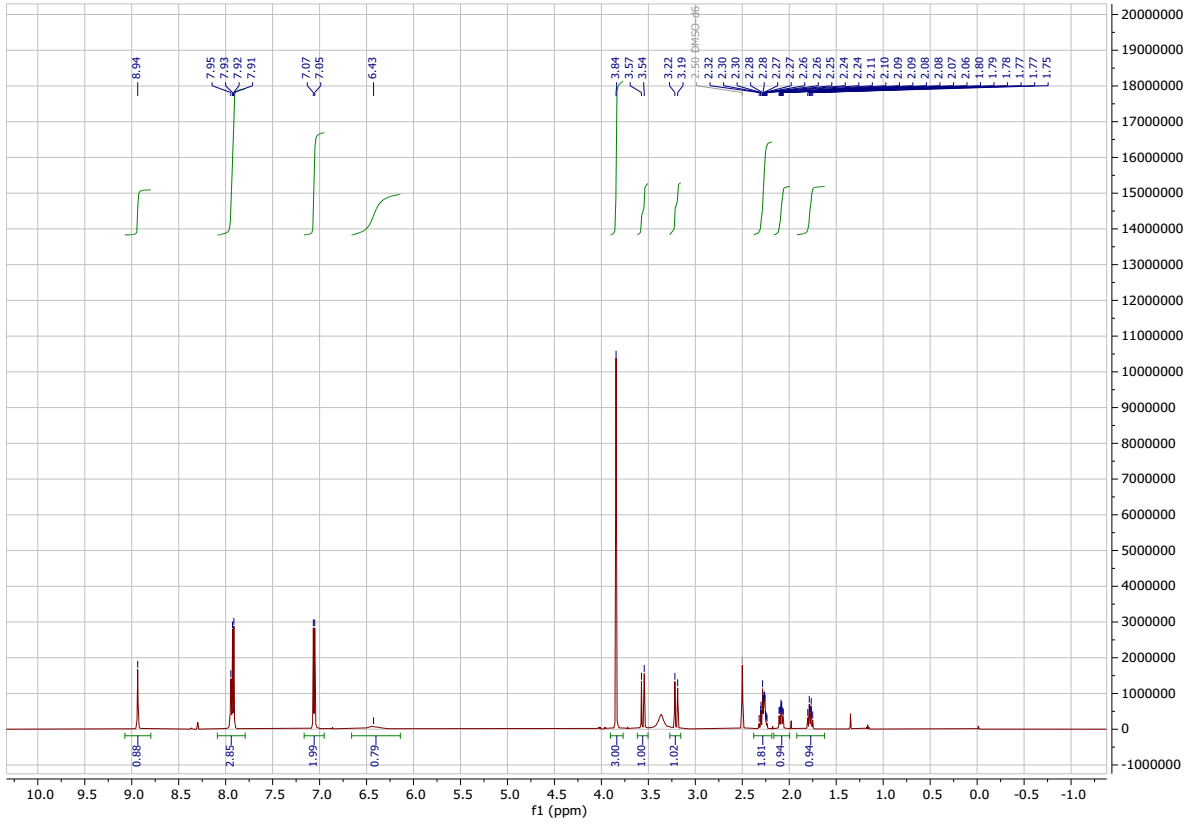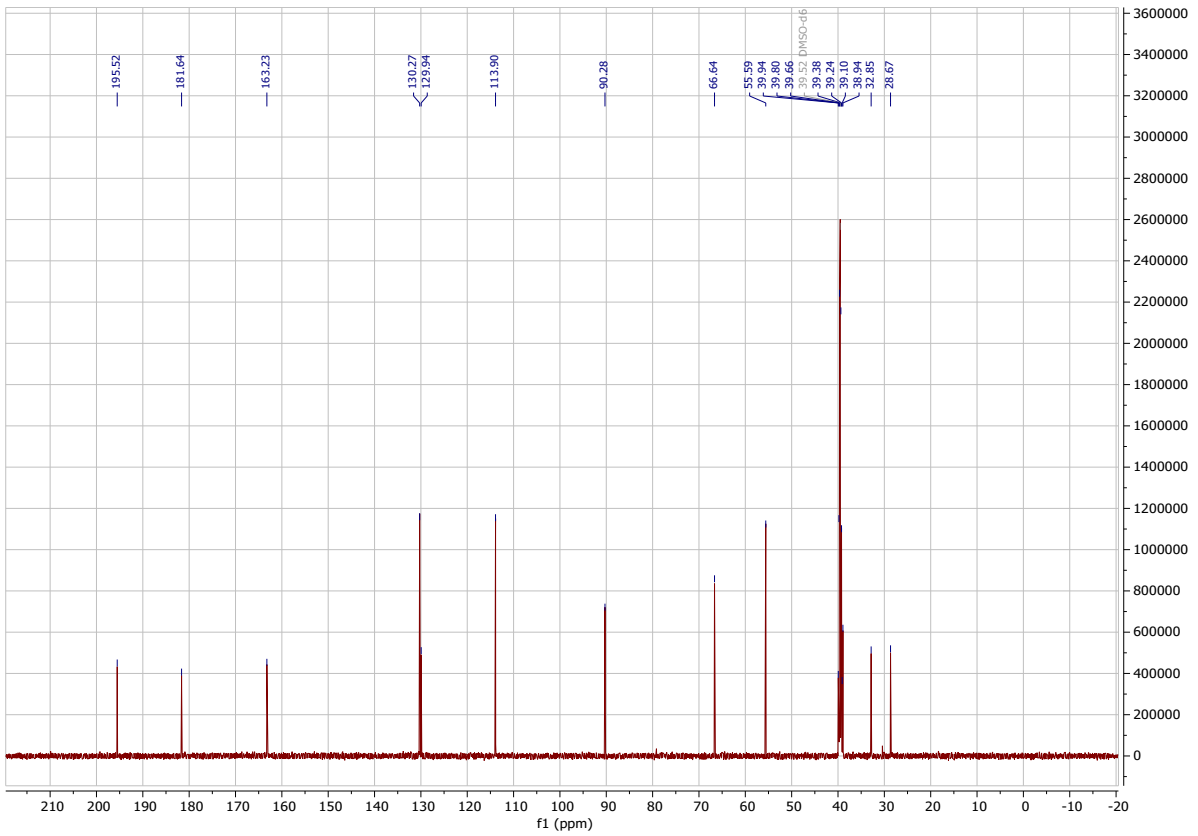



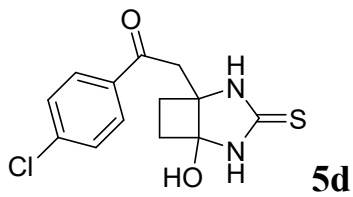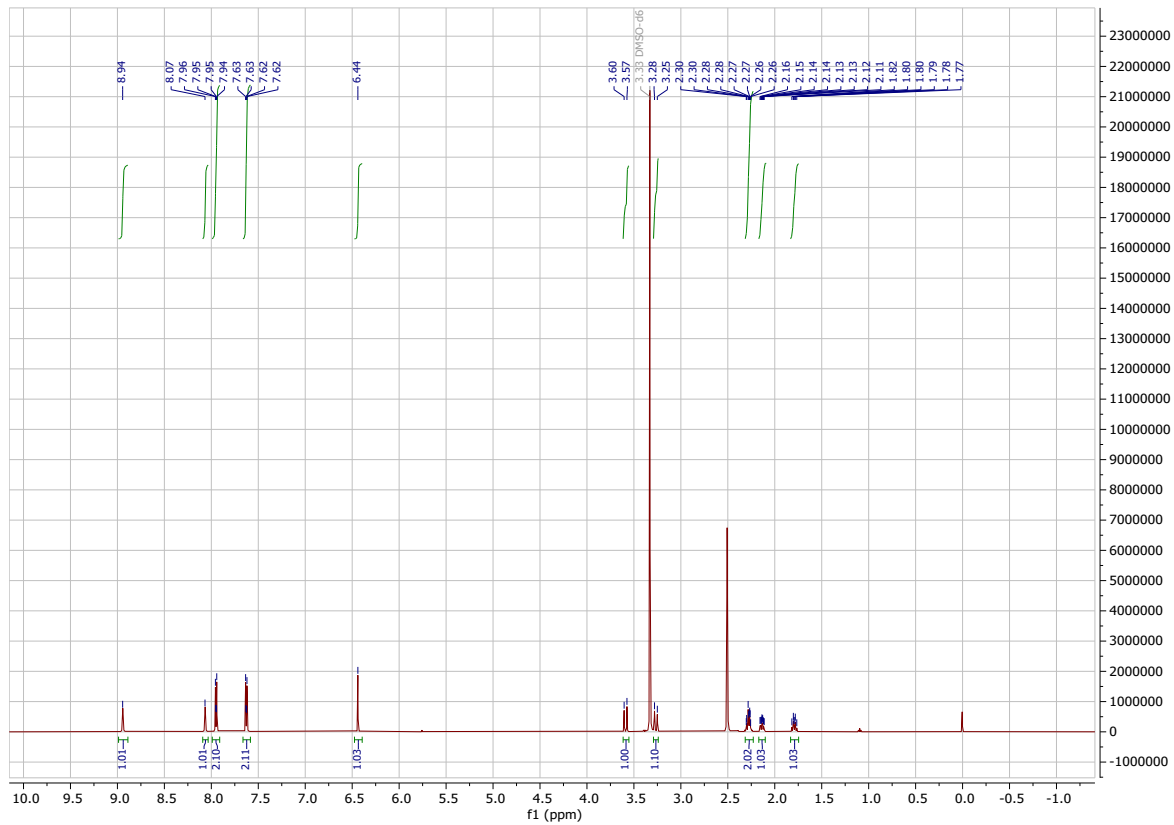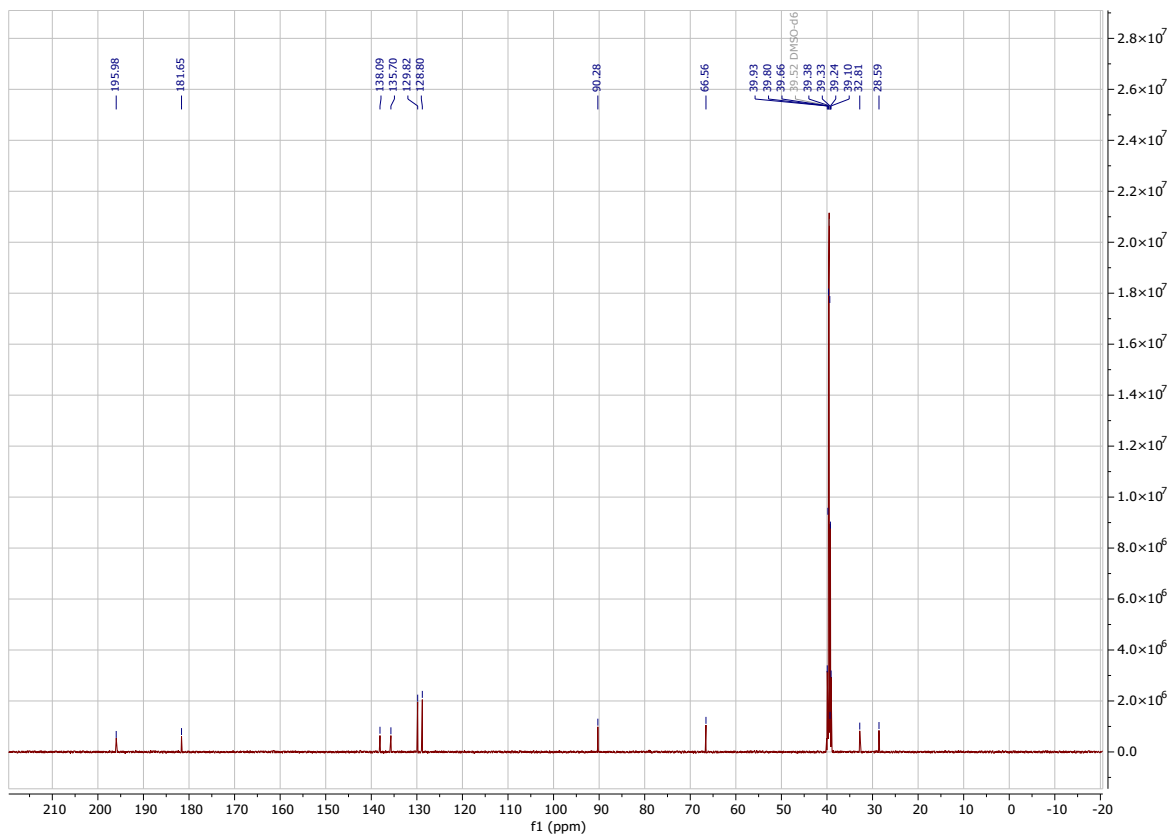

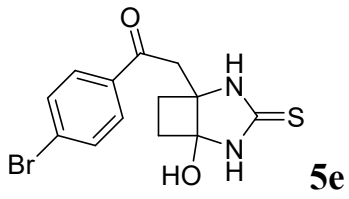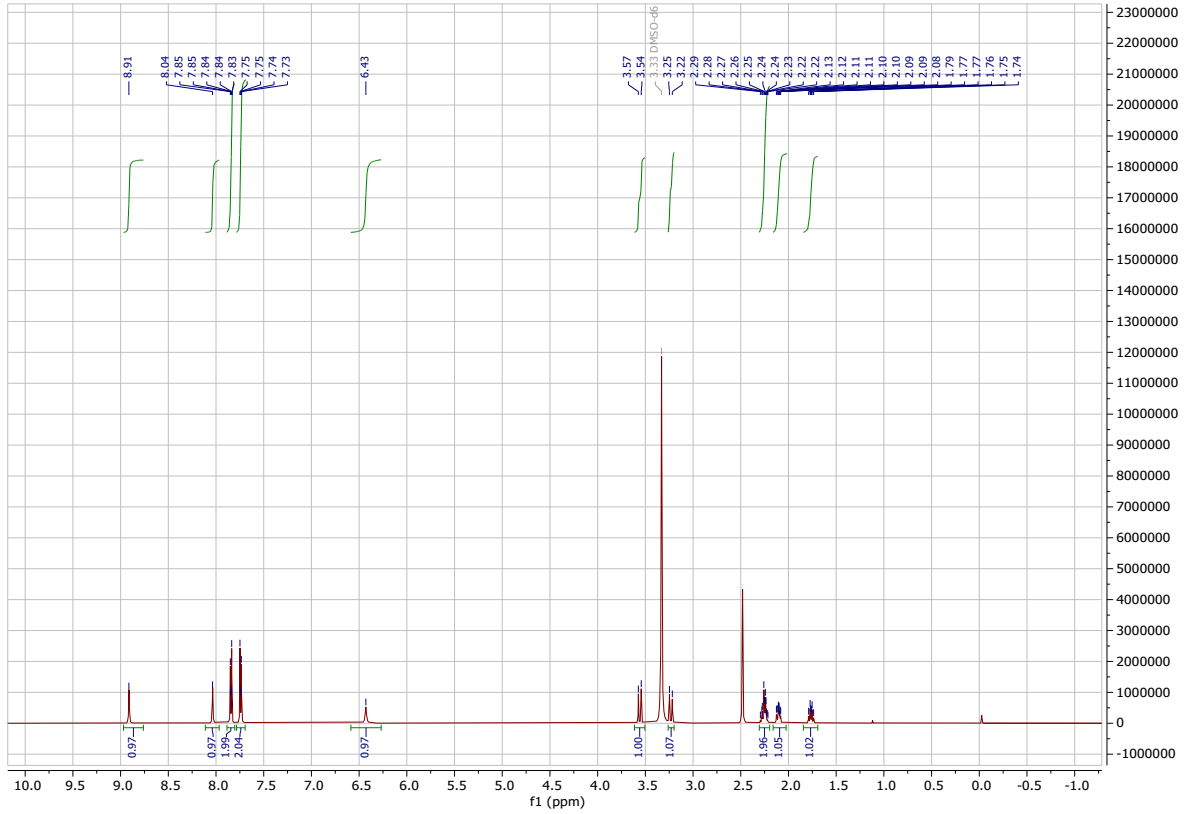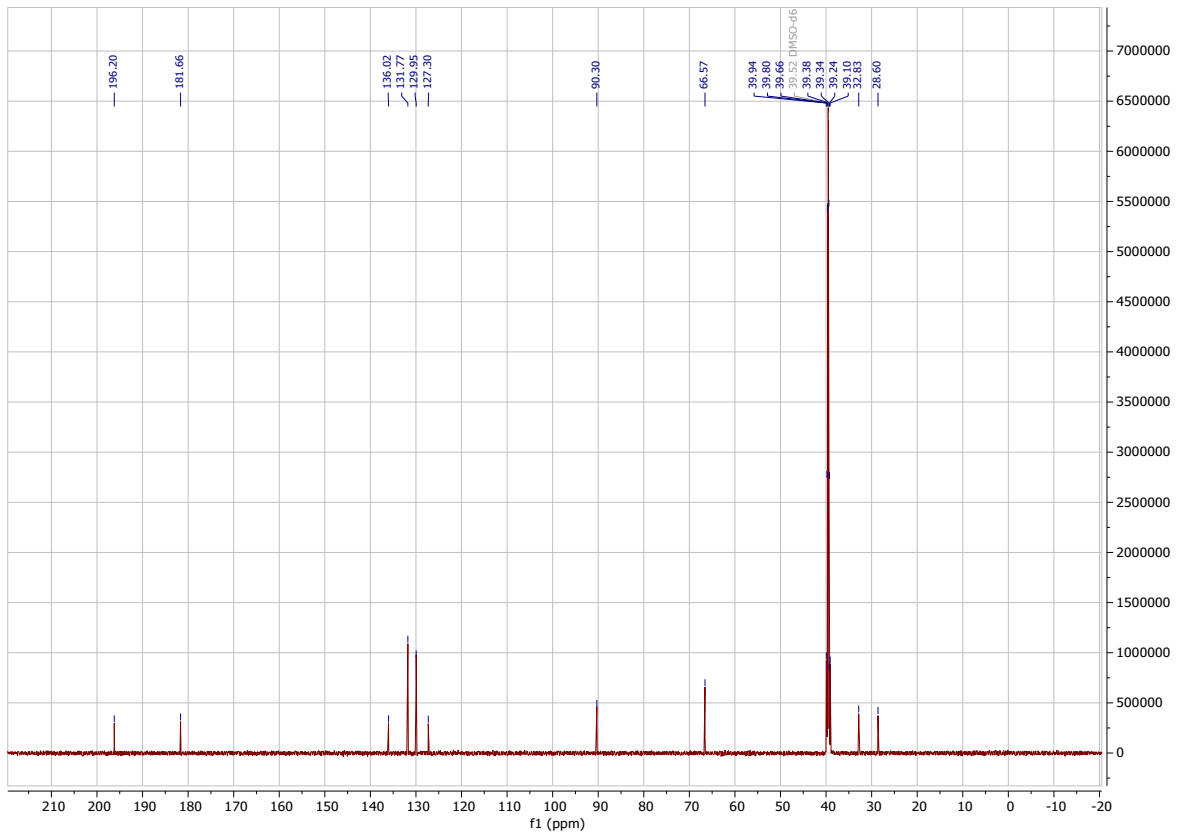

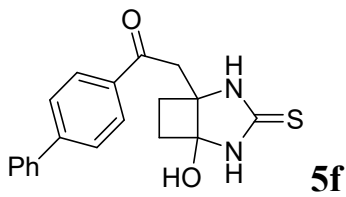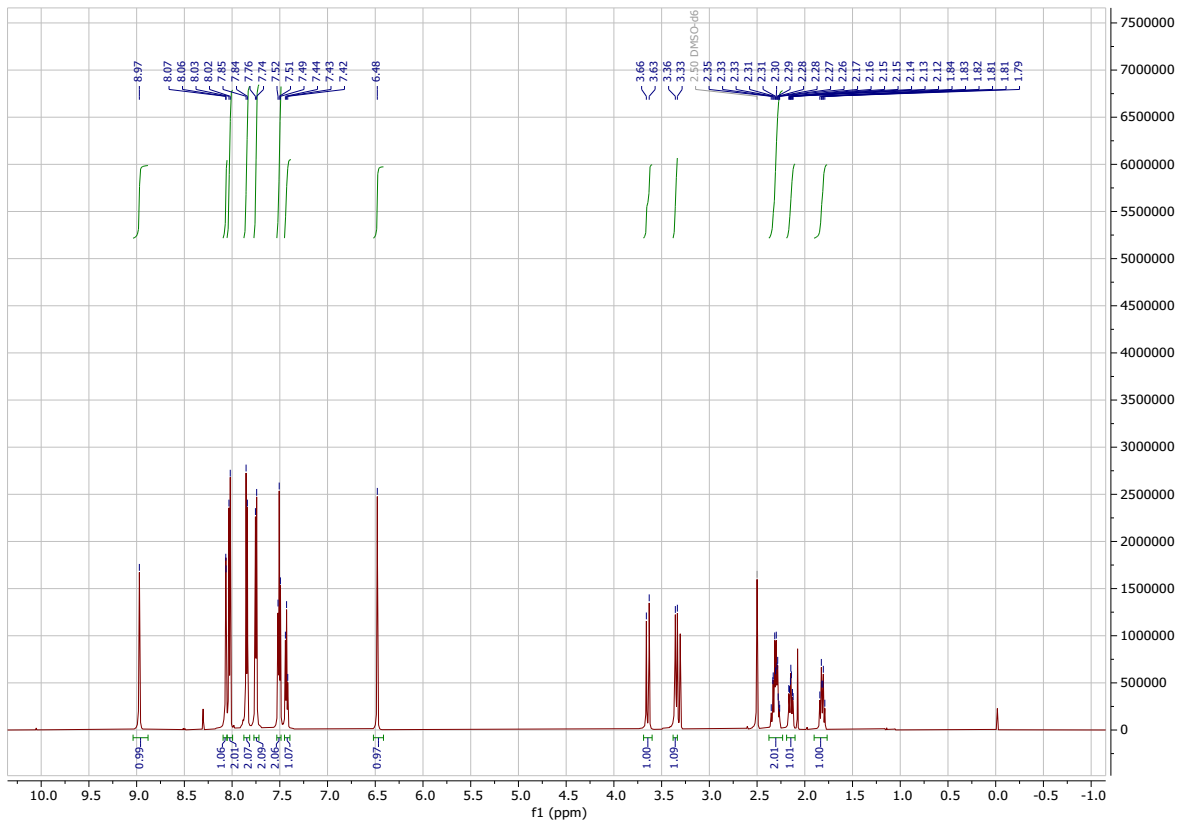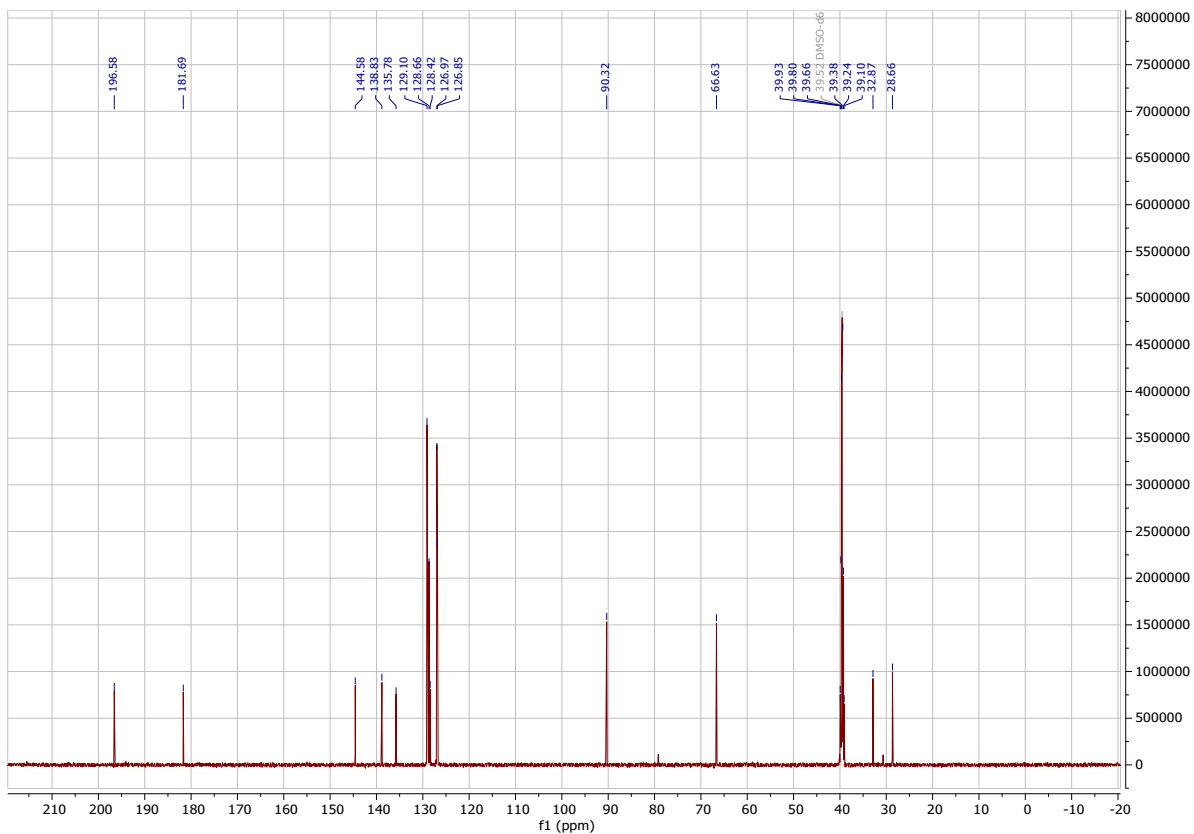



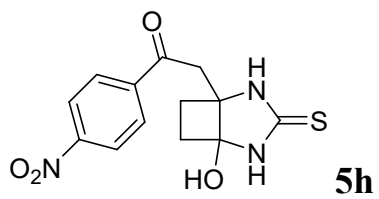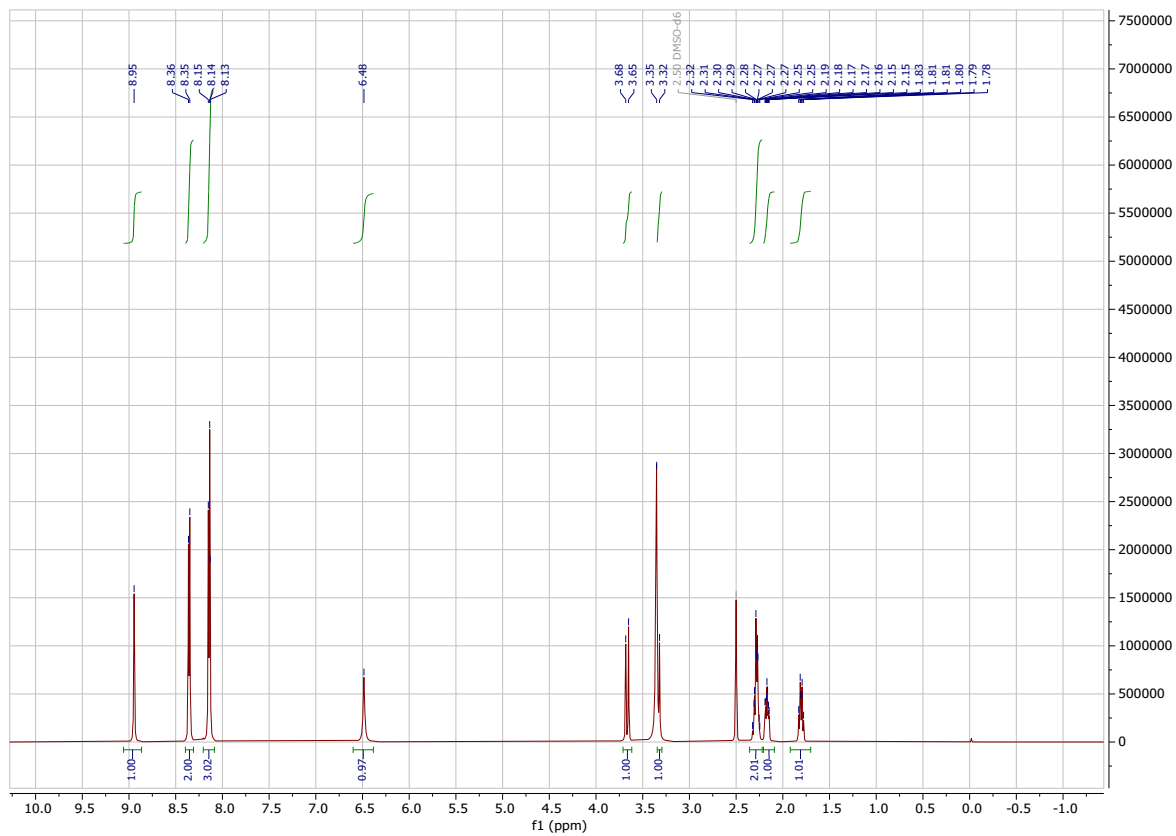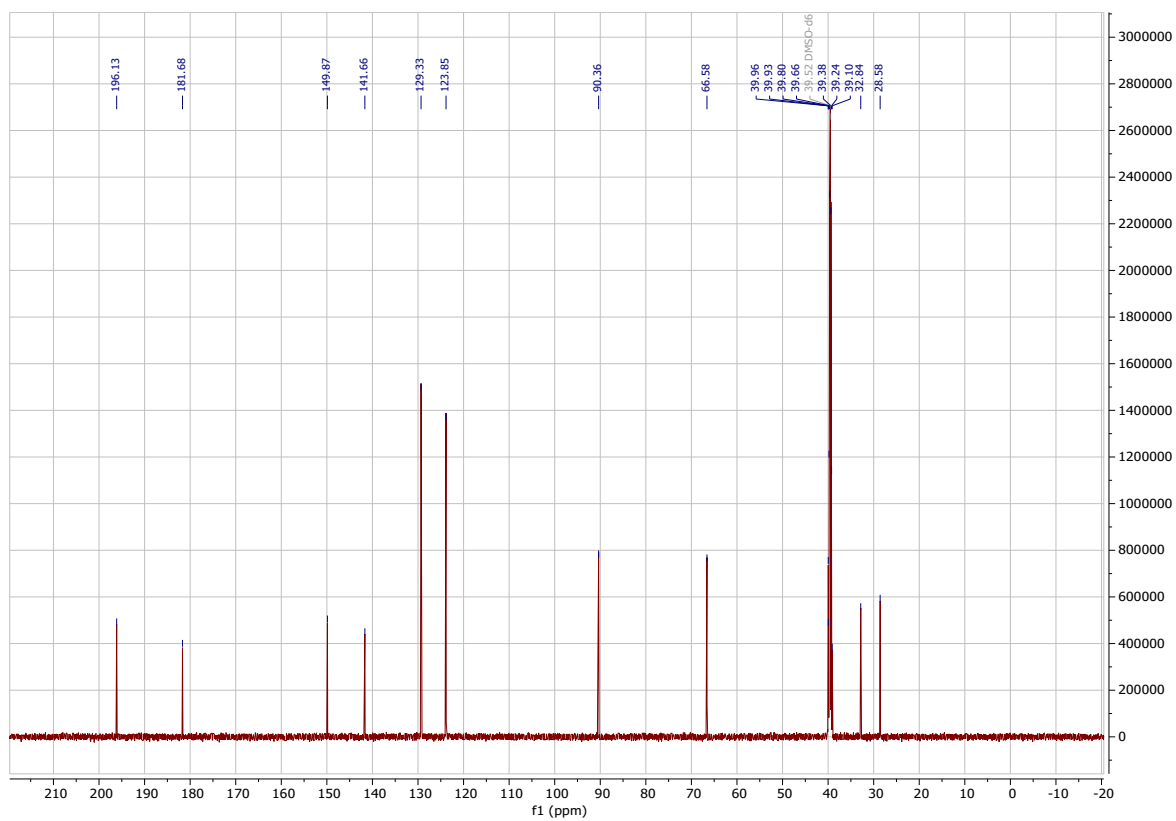

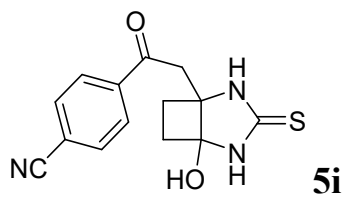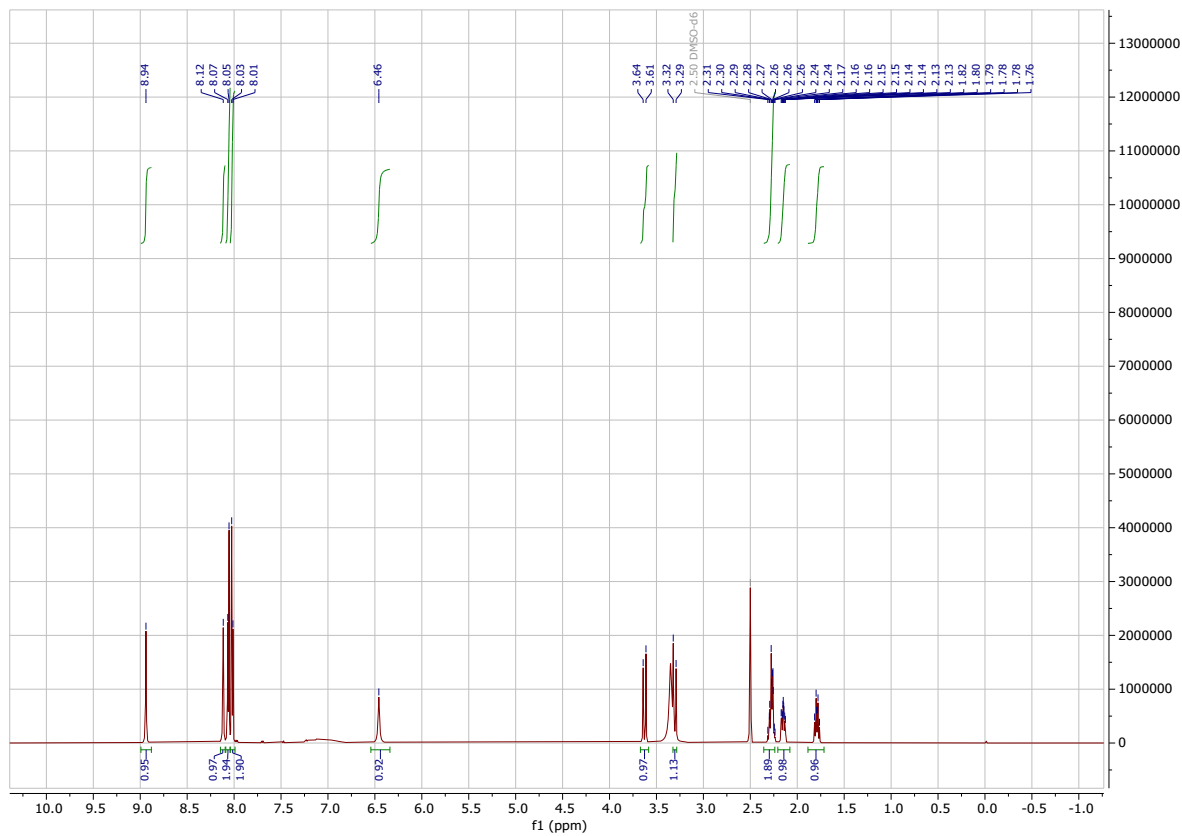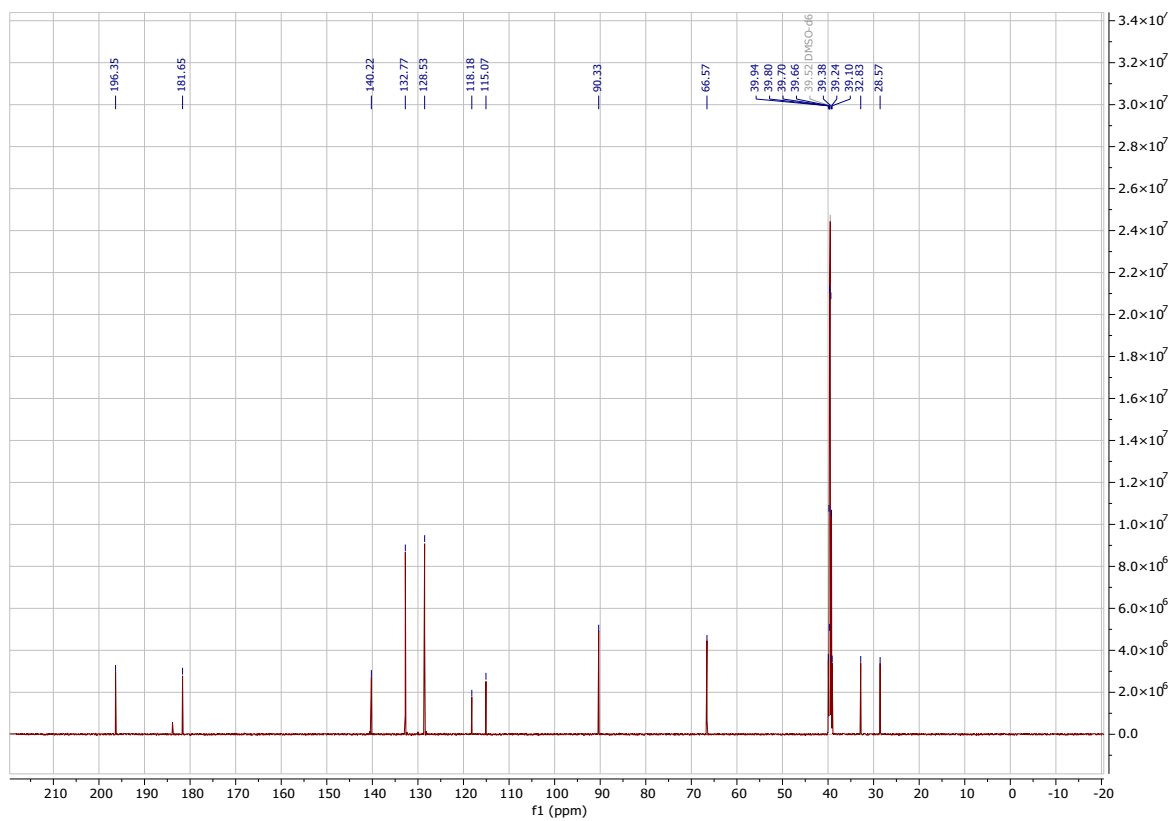

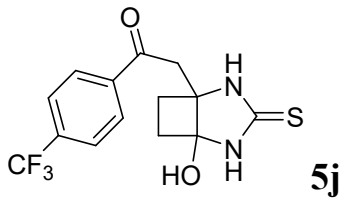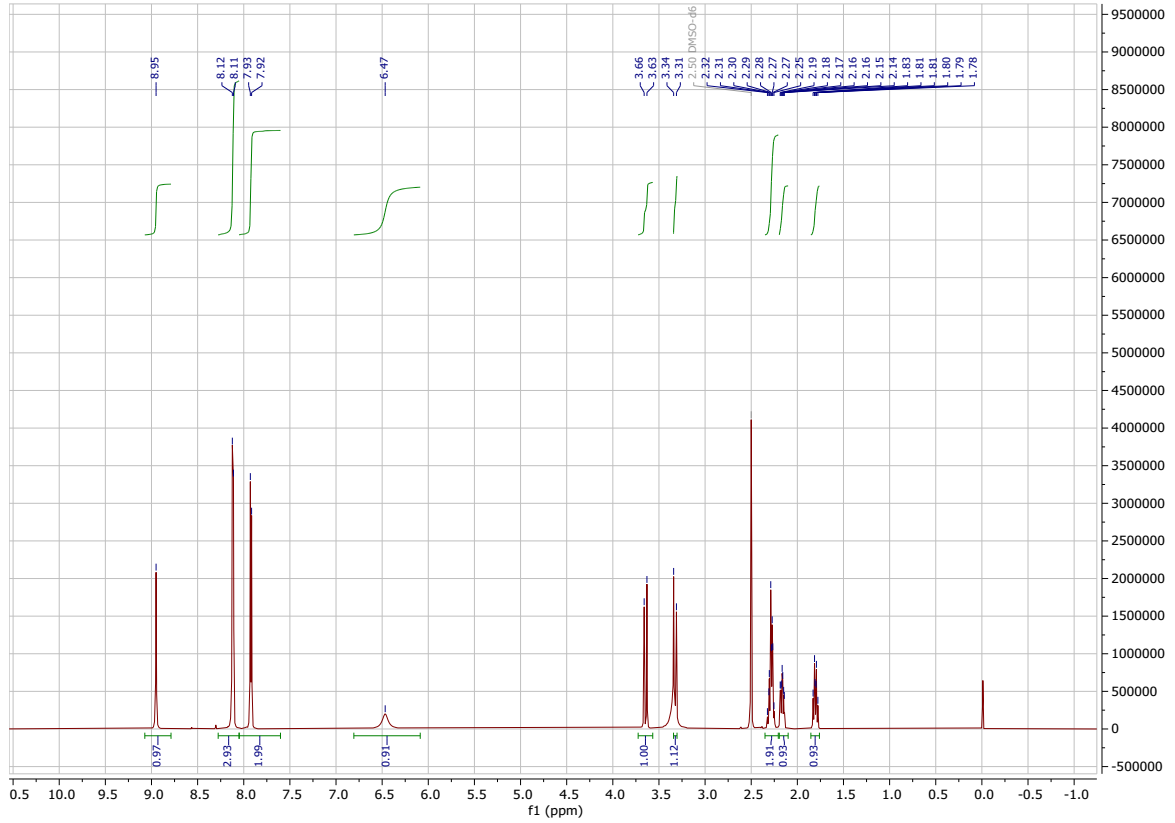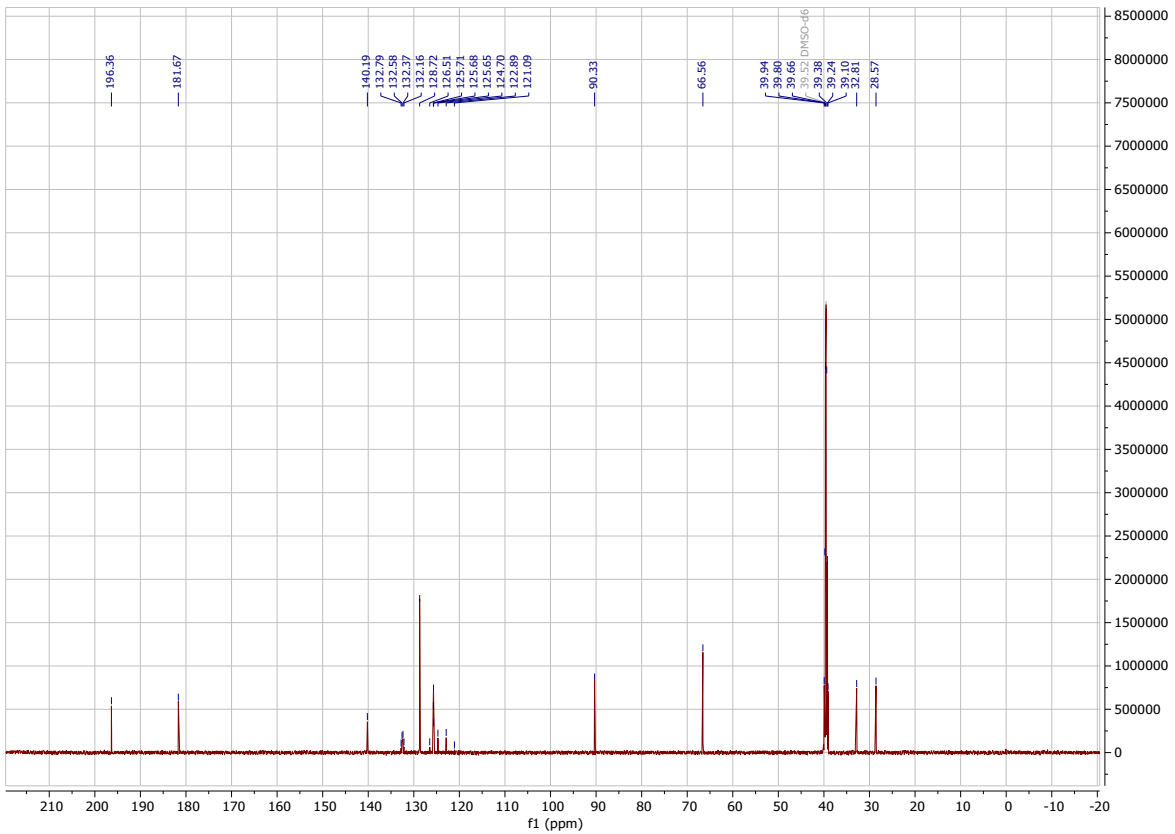

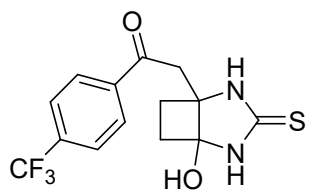

5j <sup>19</sup>F NMR

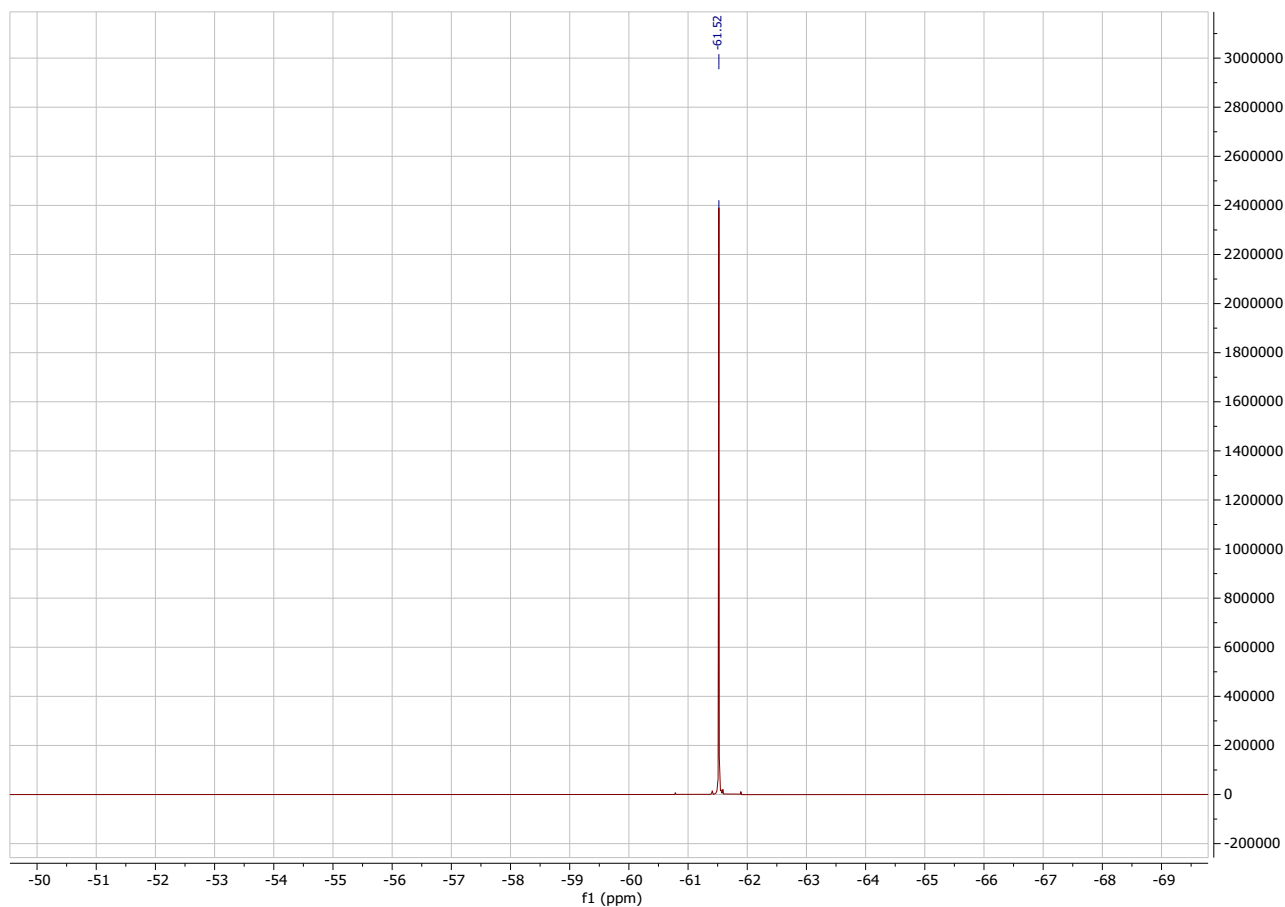



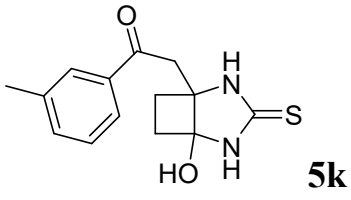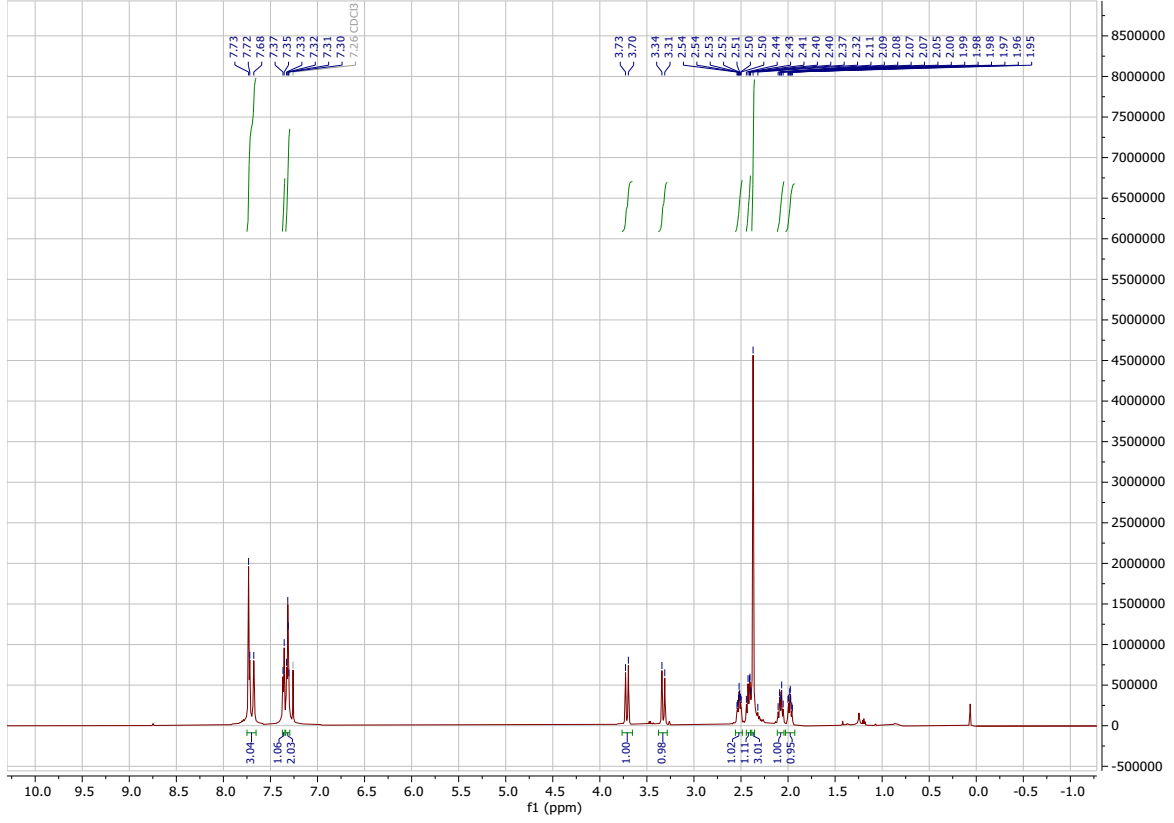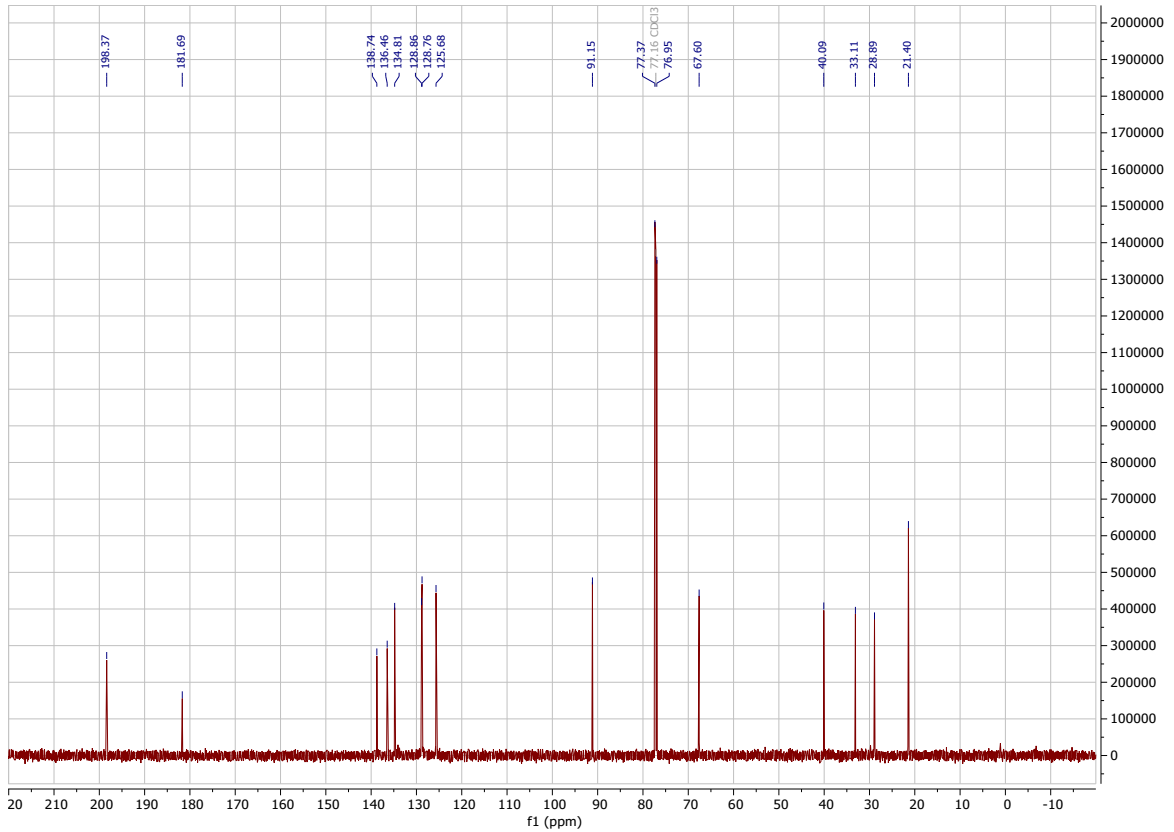

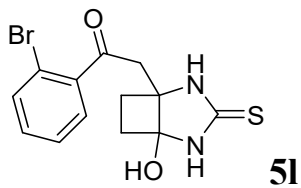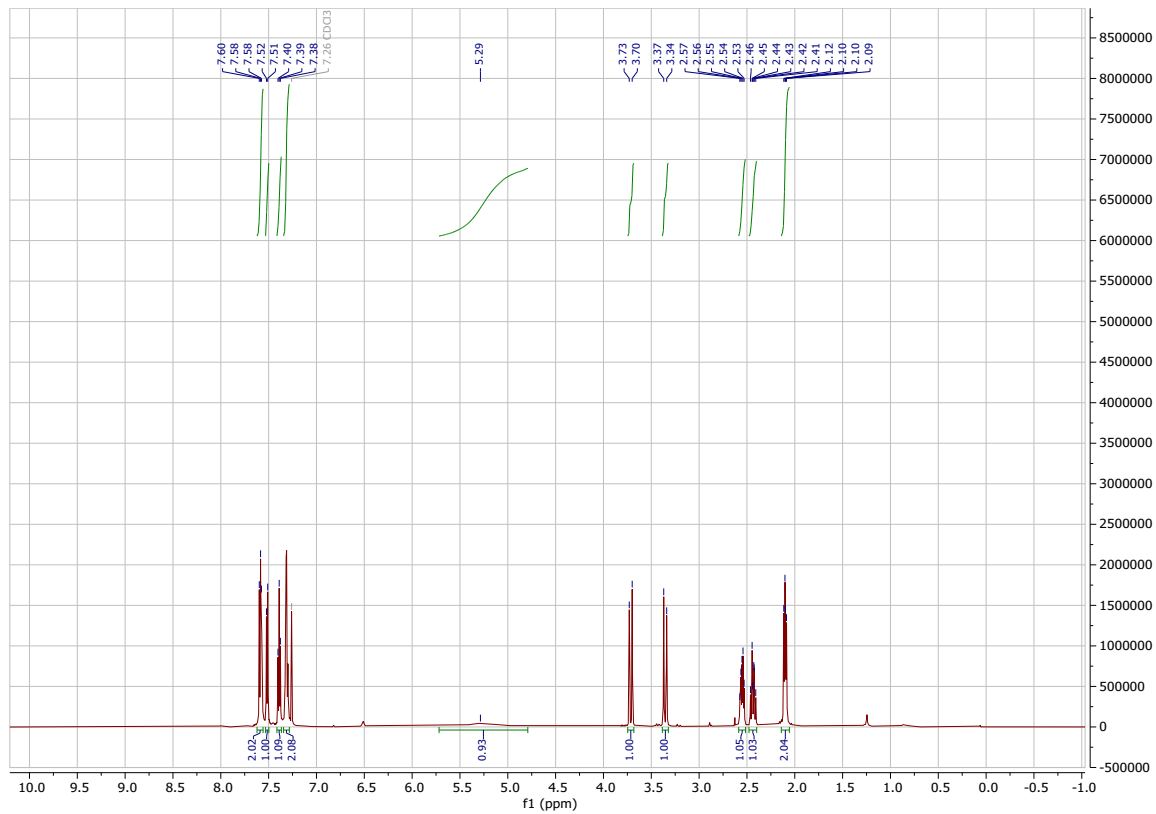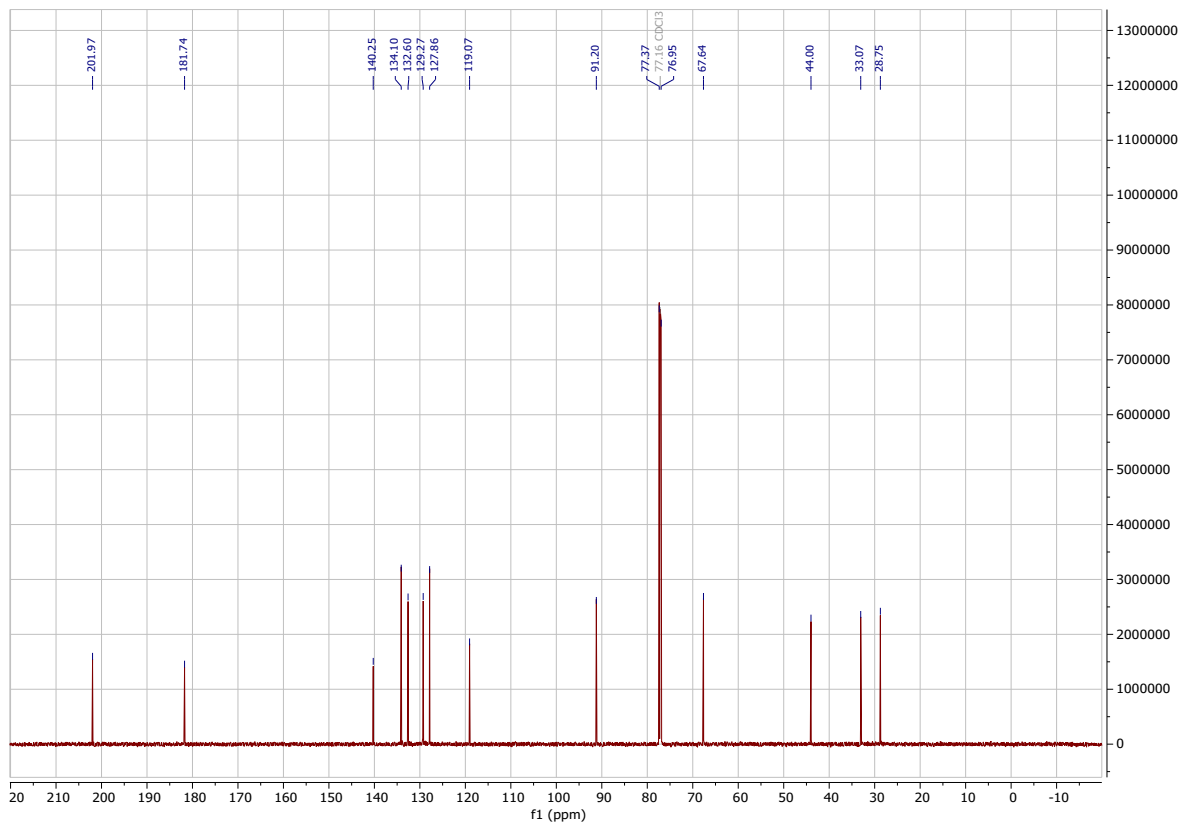

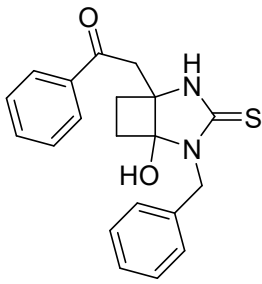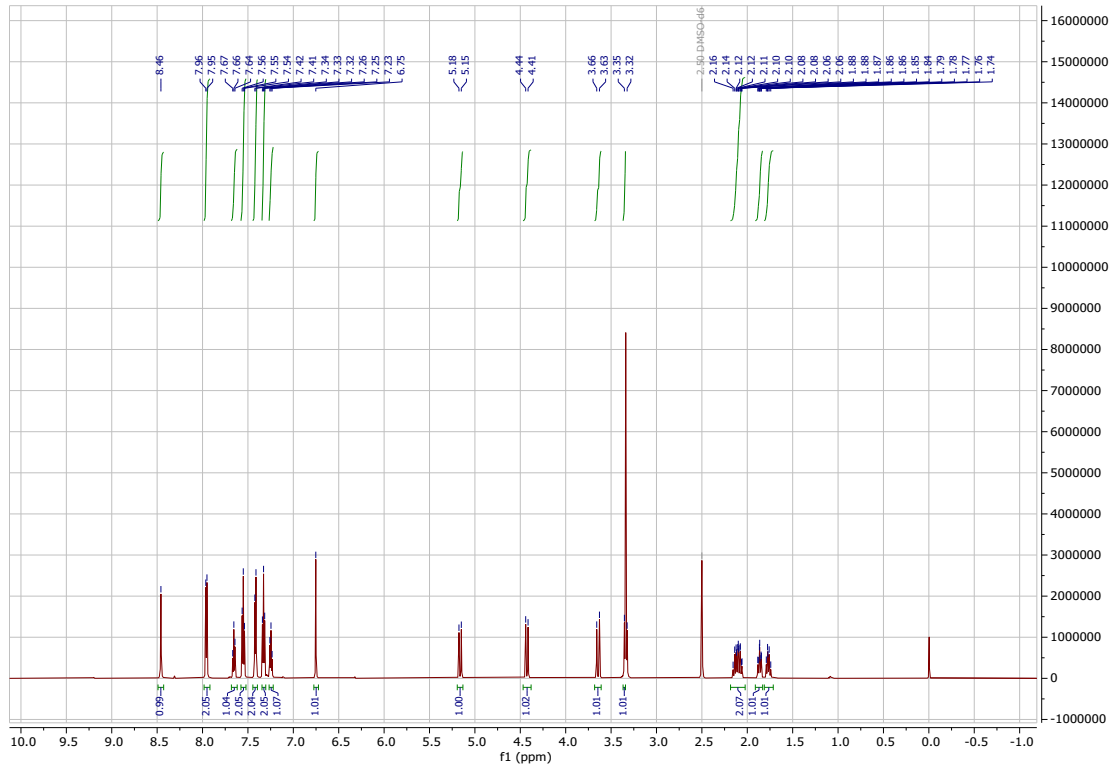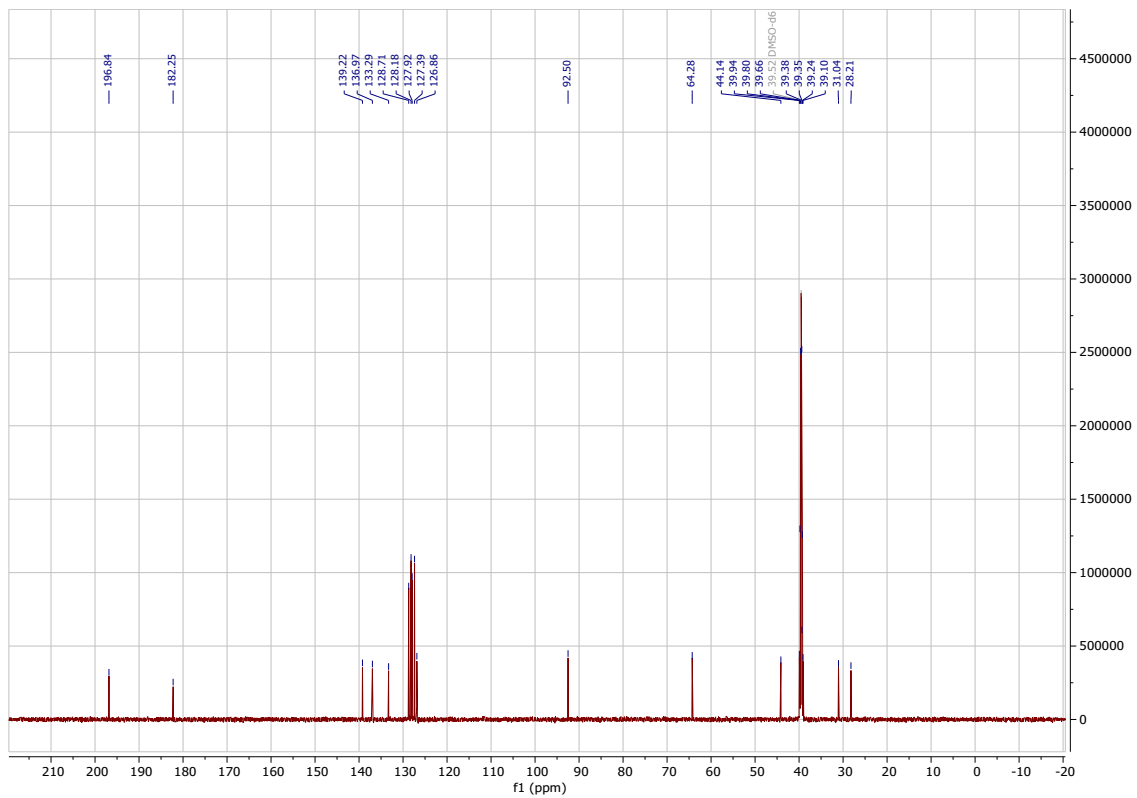

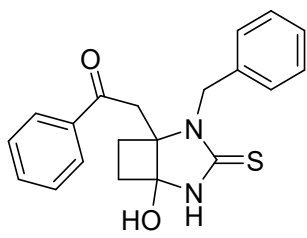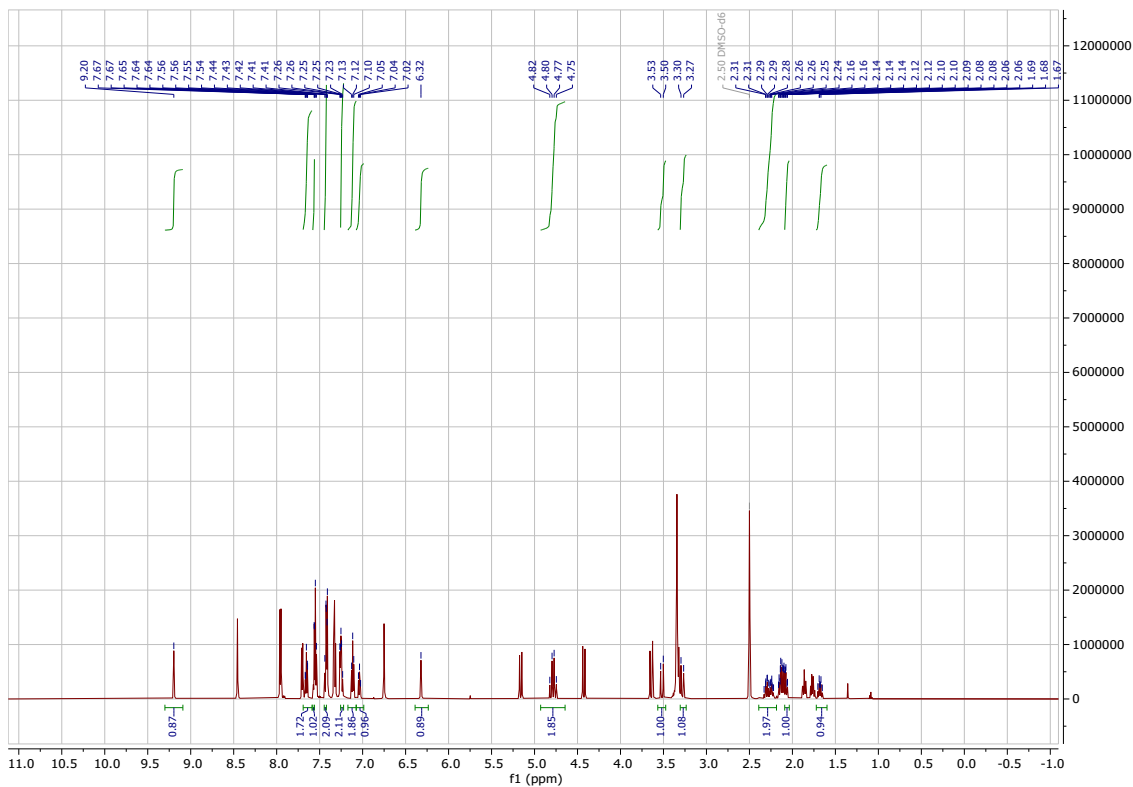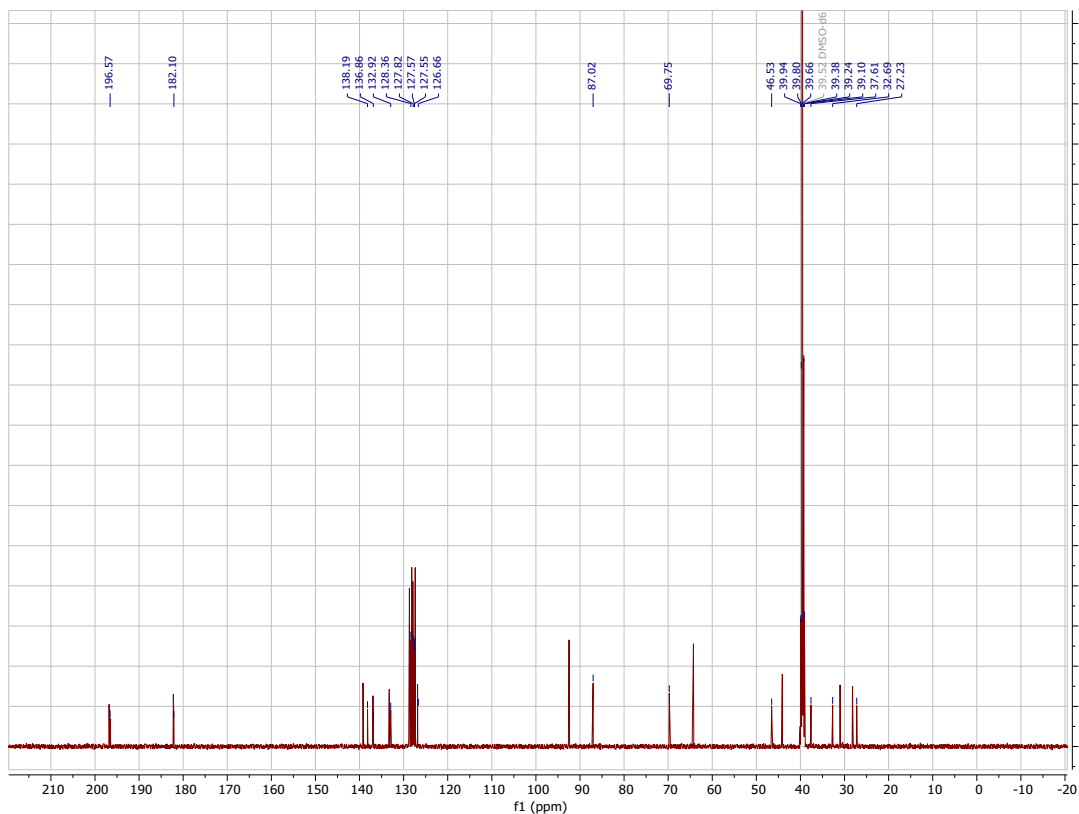

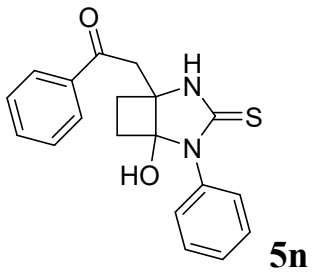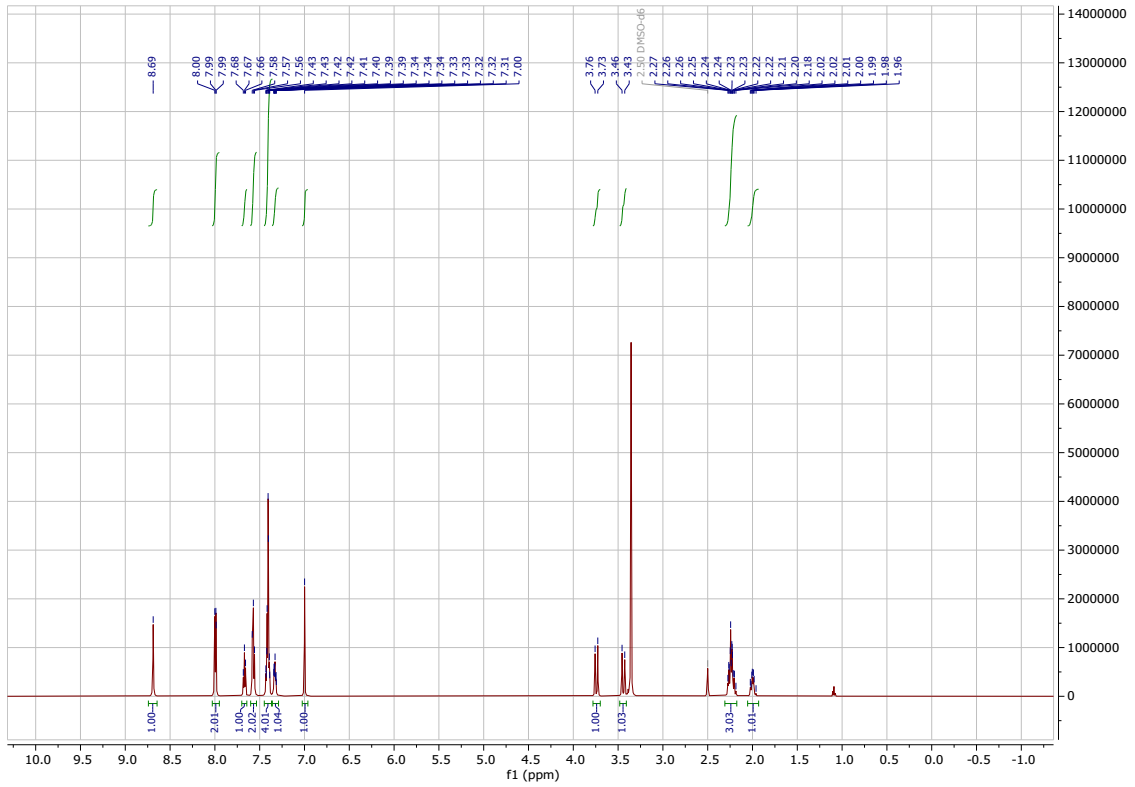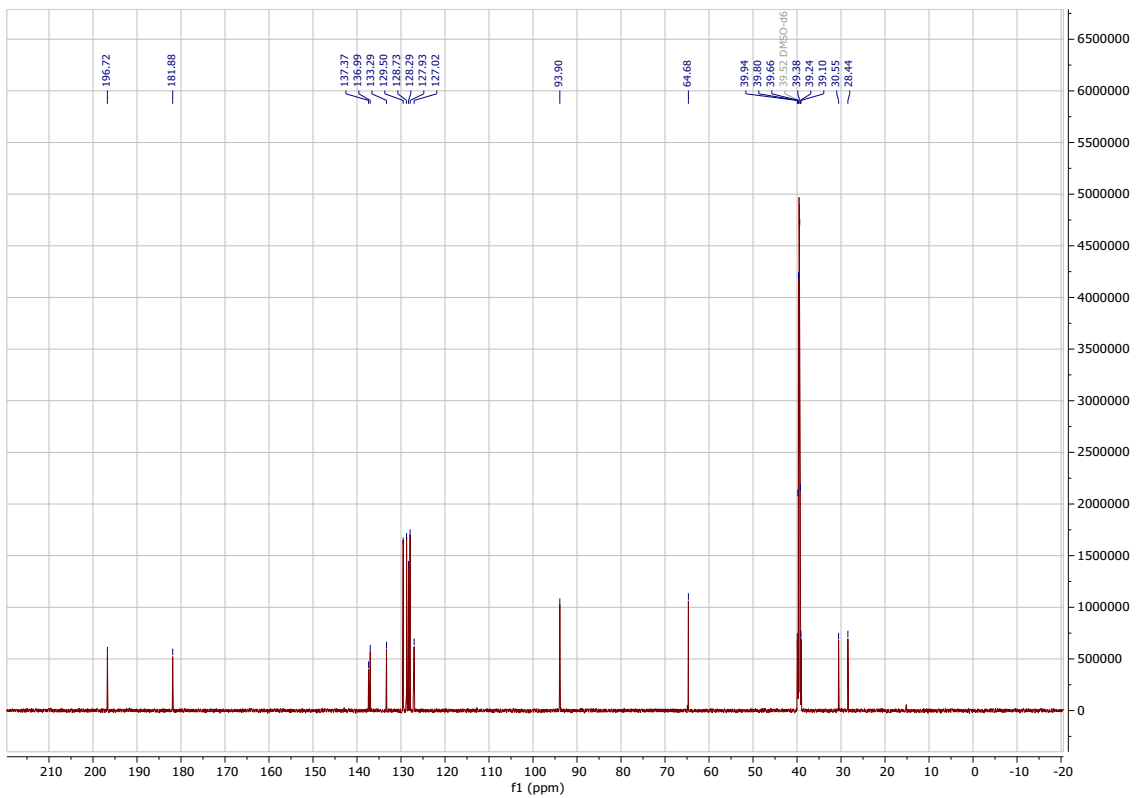

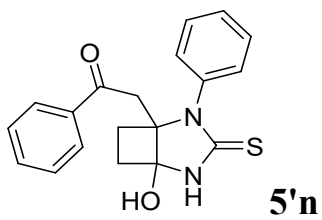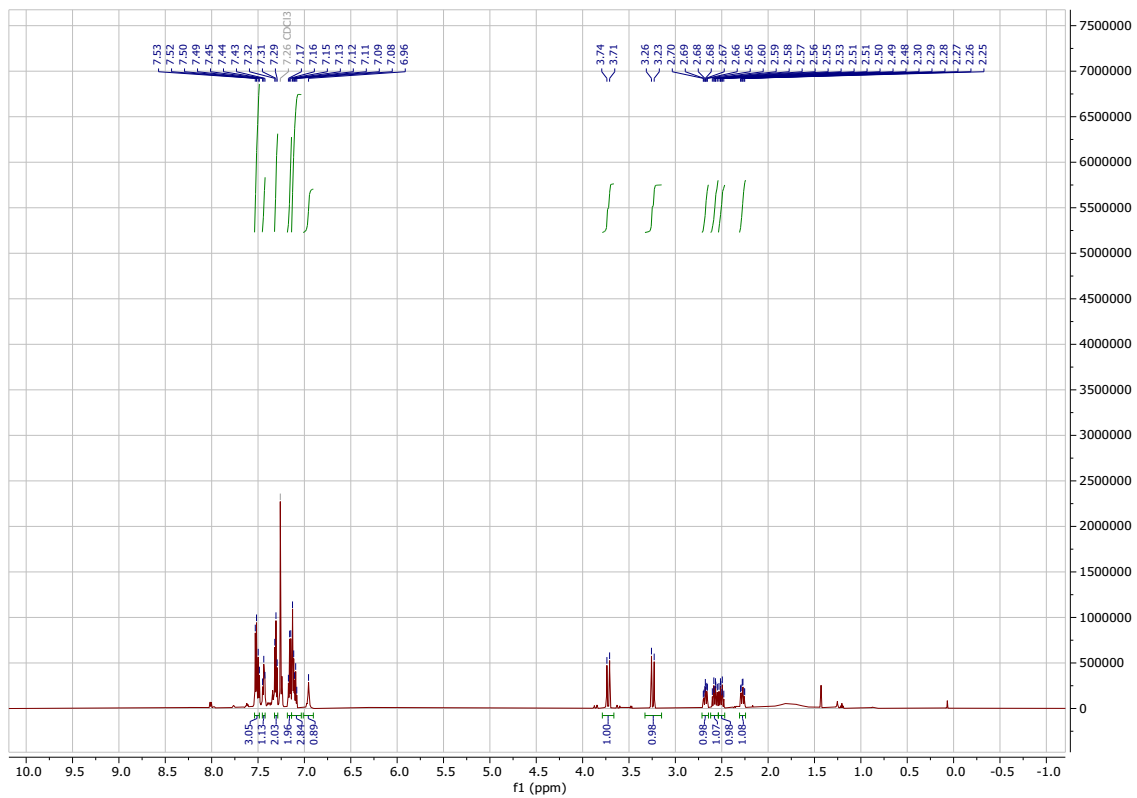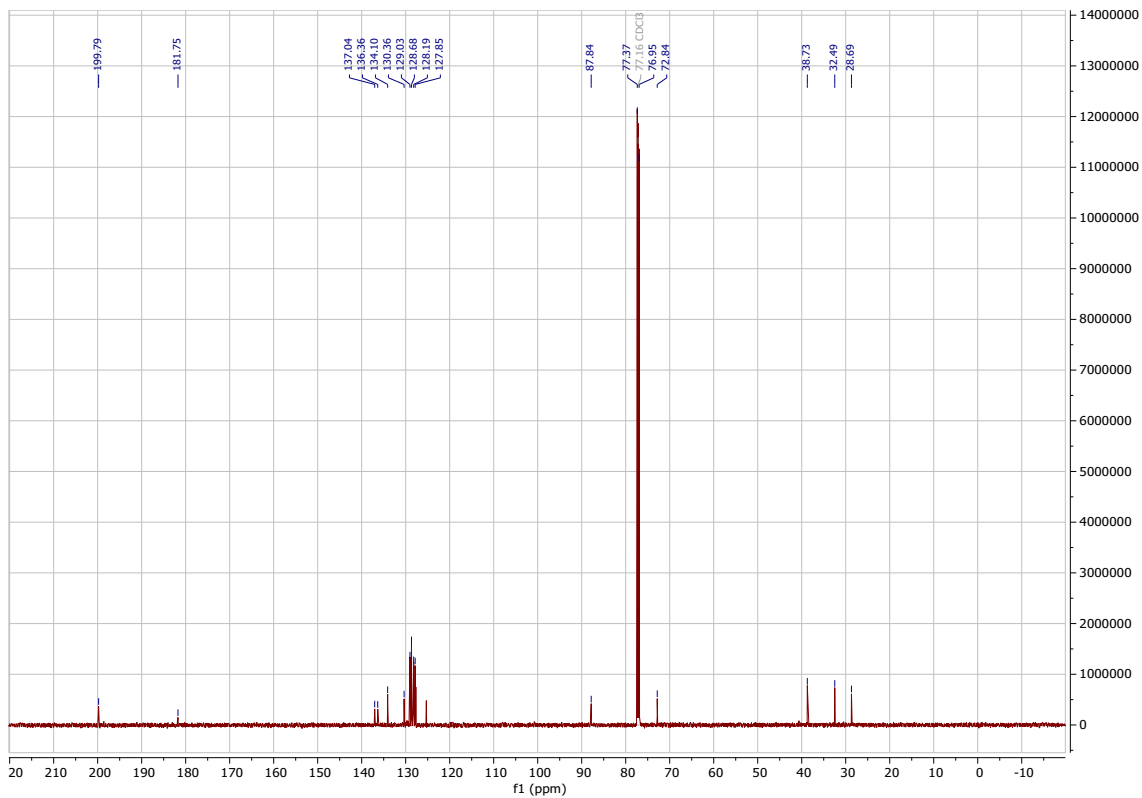

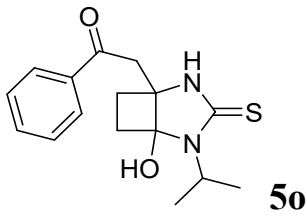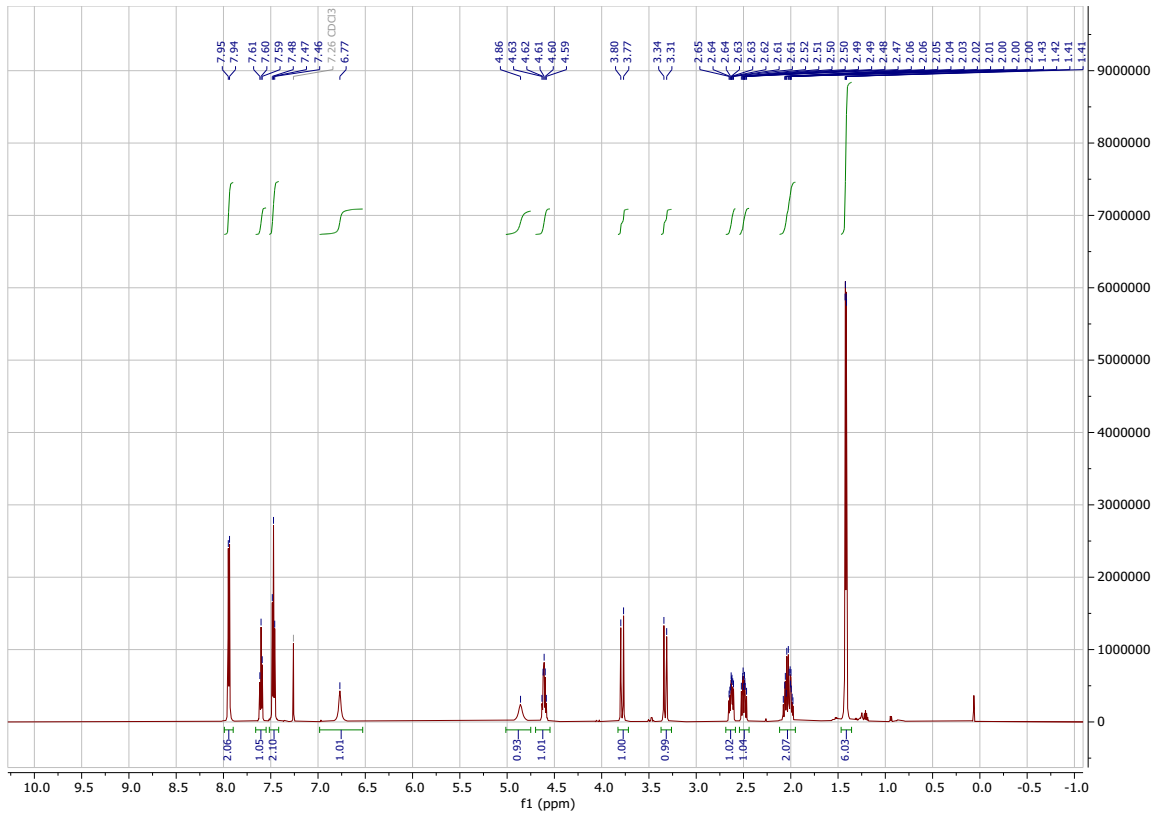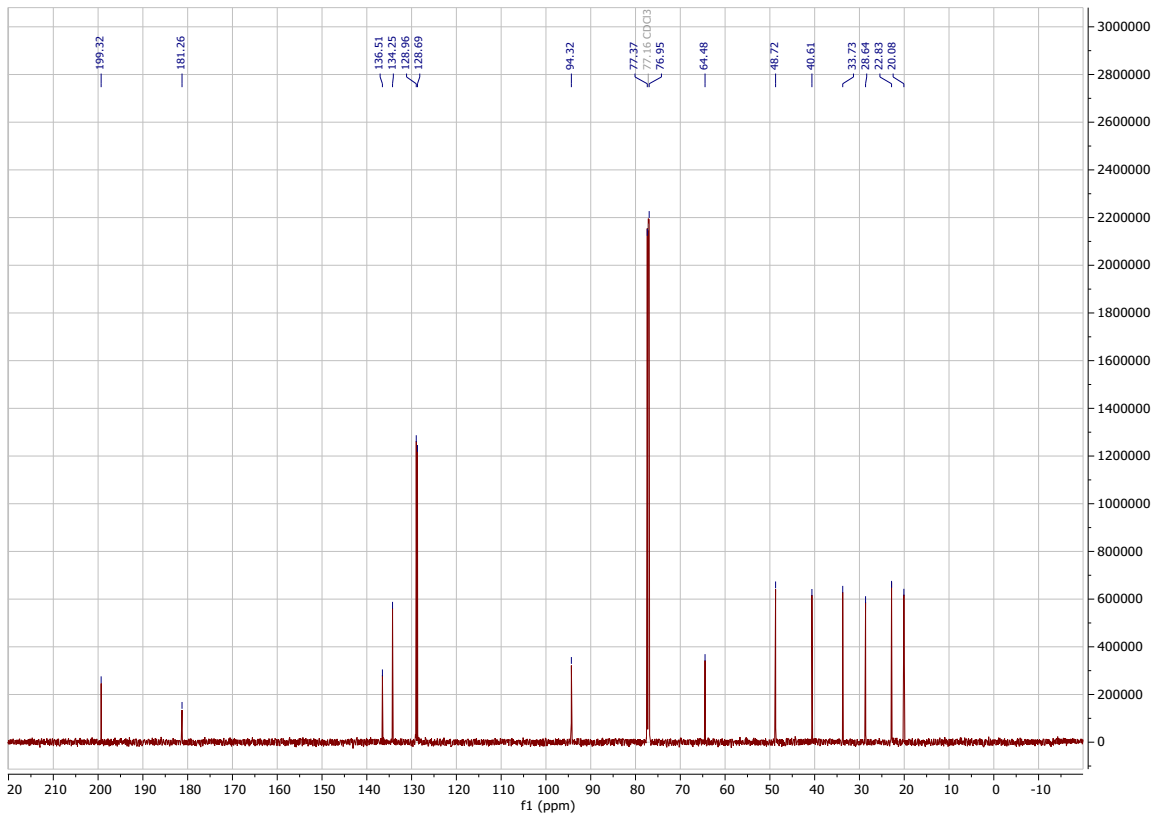

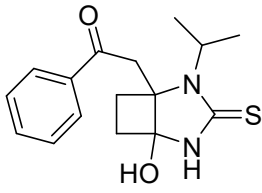

5'o

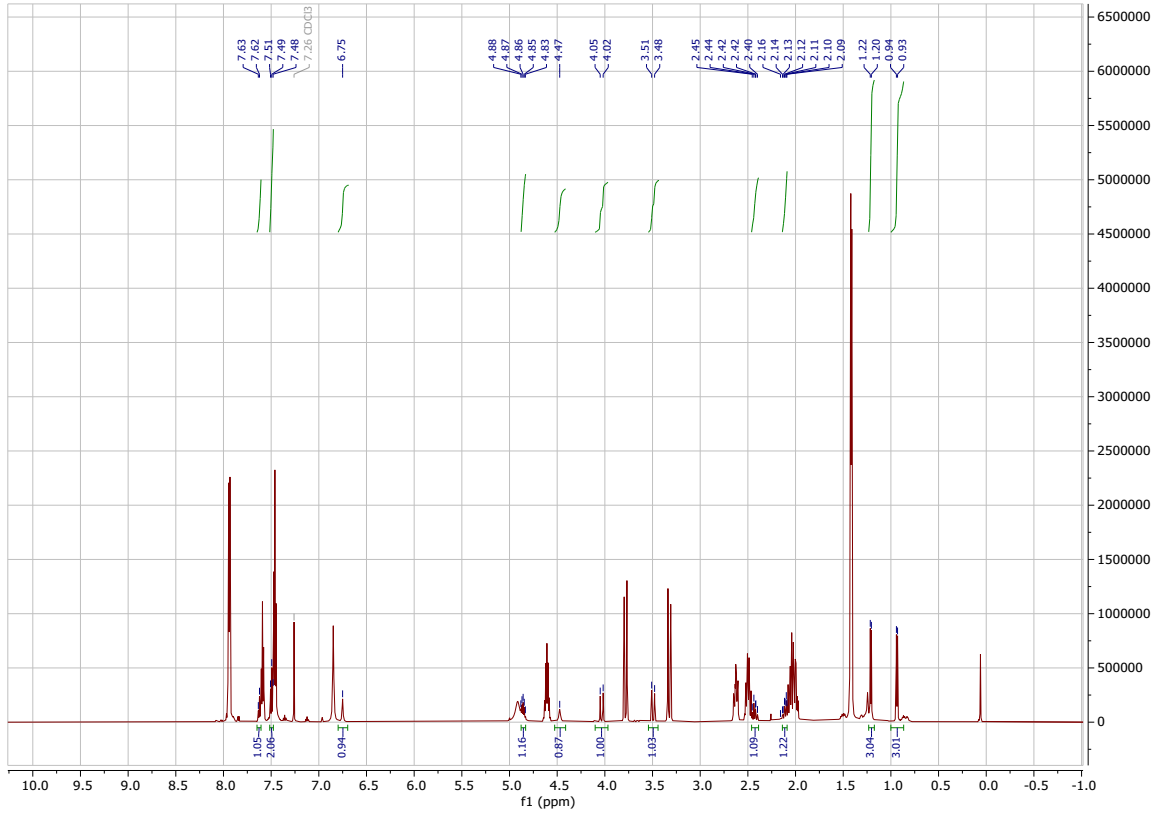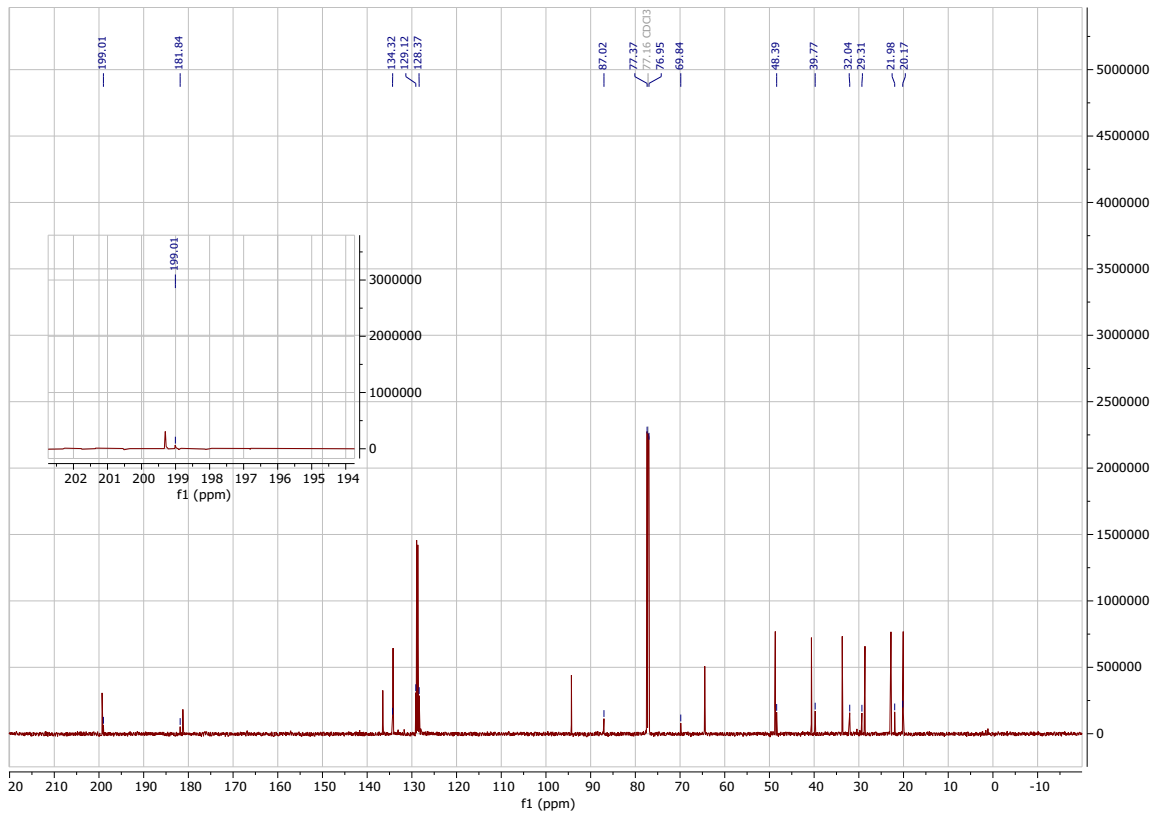



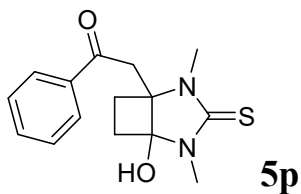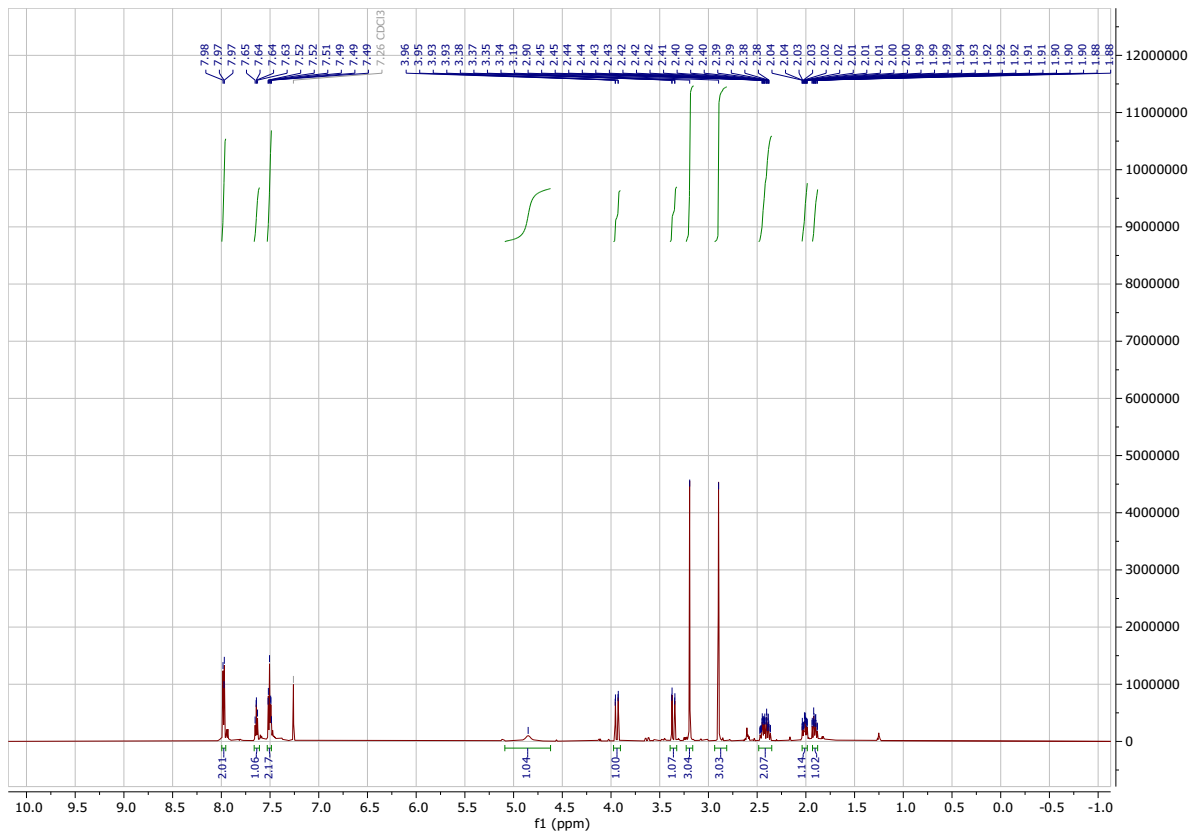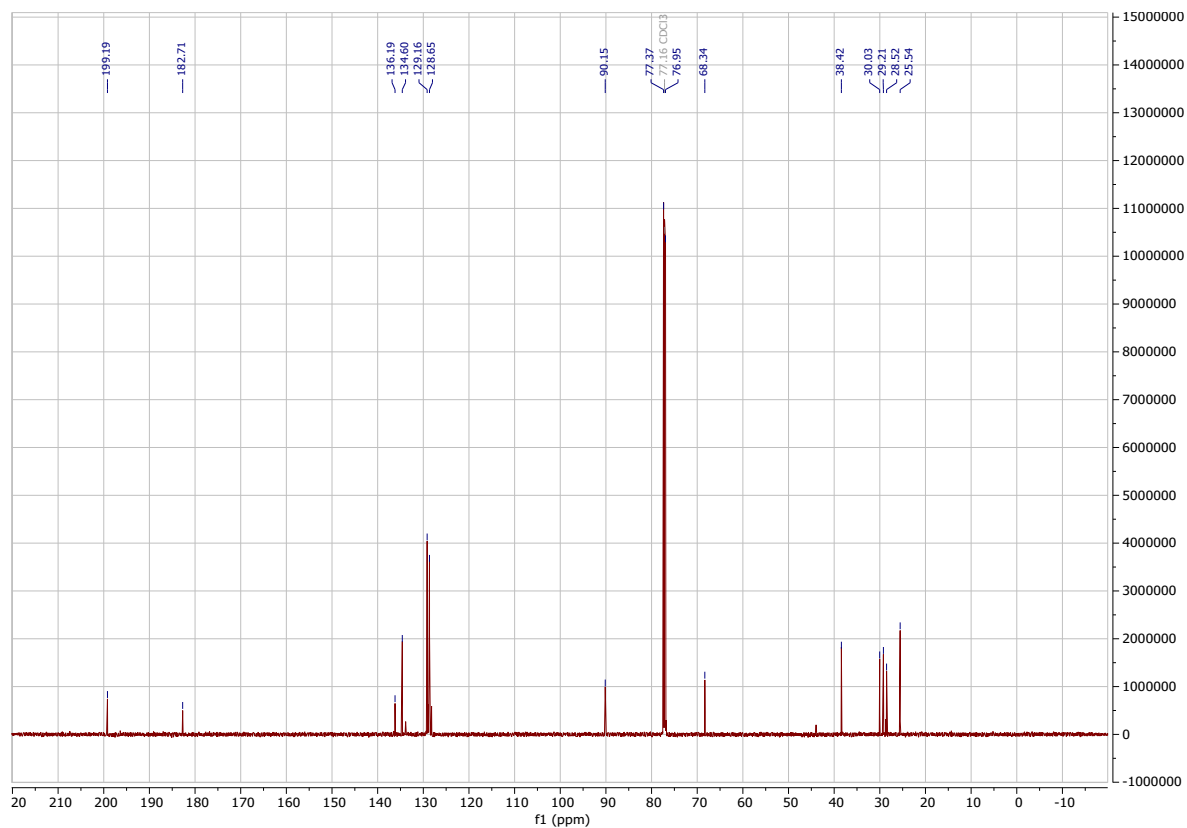

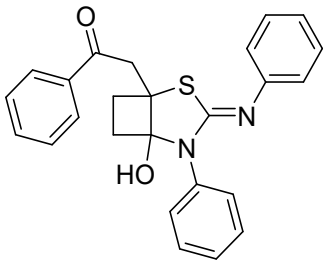

6a

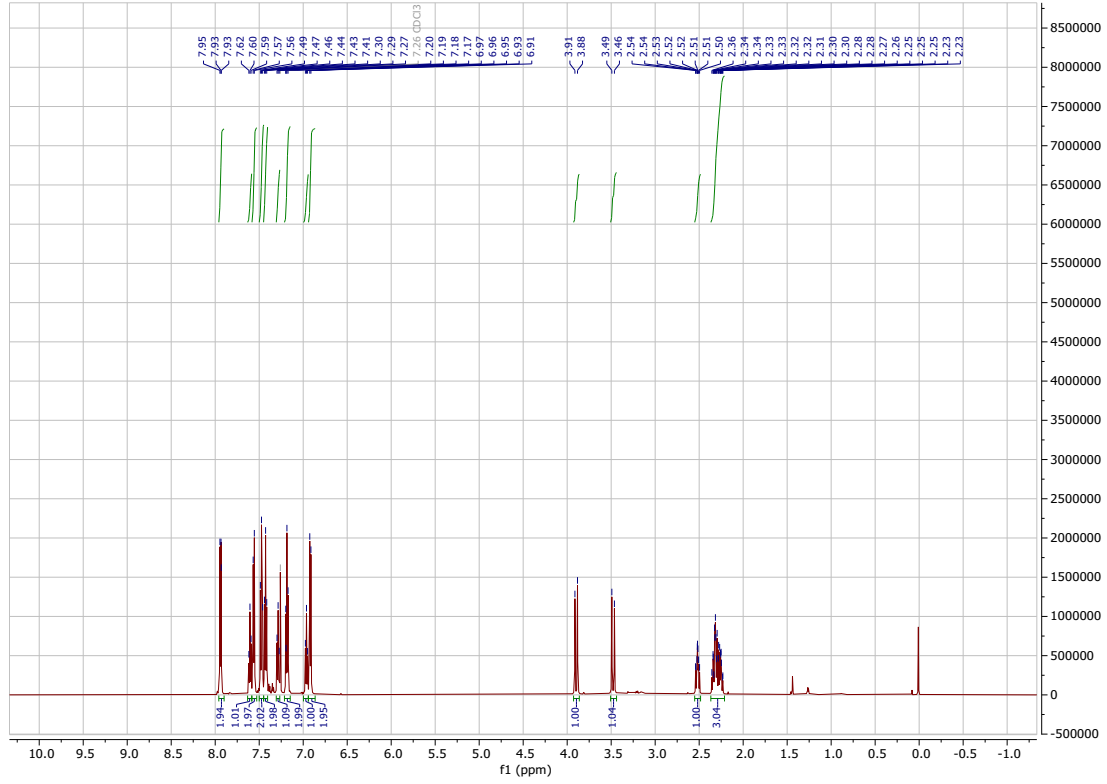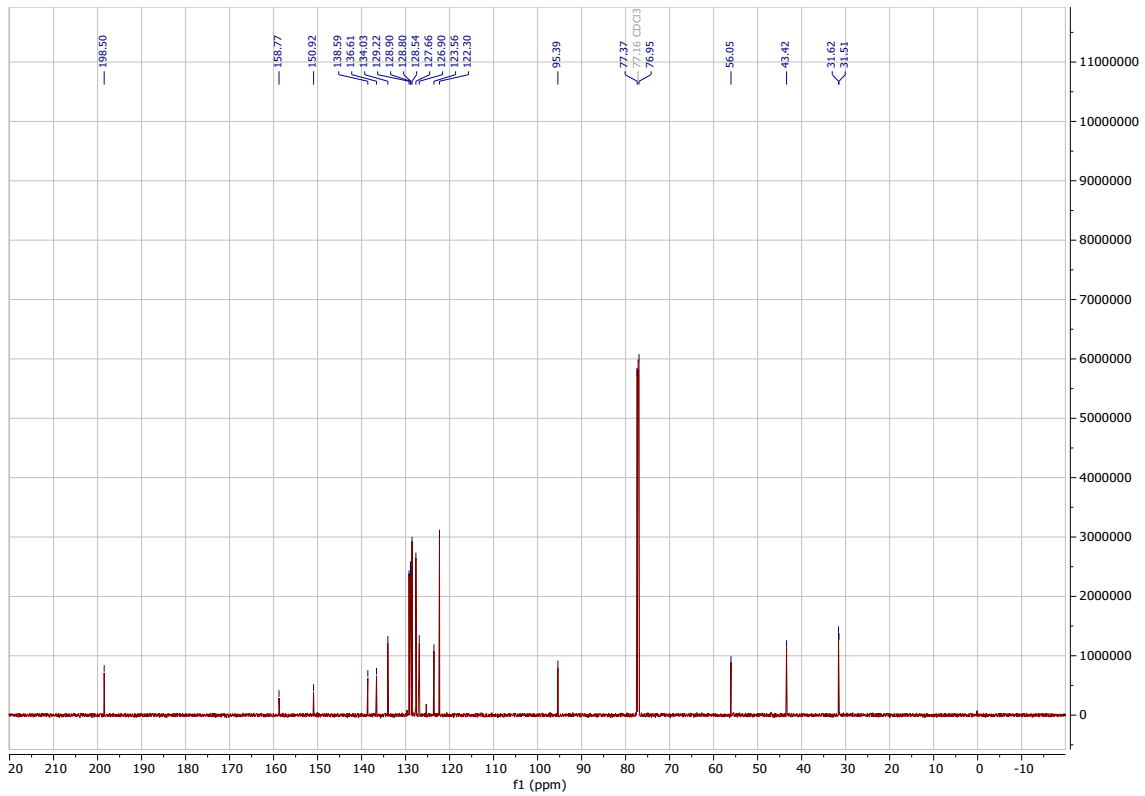

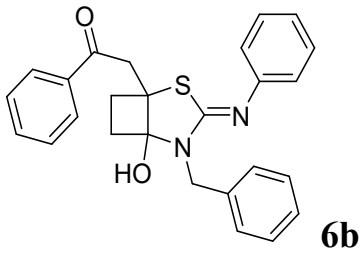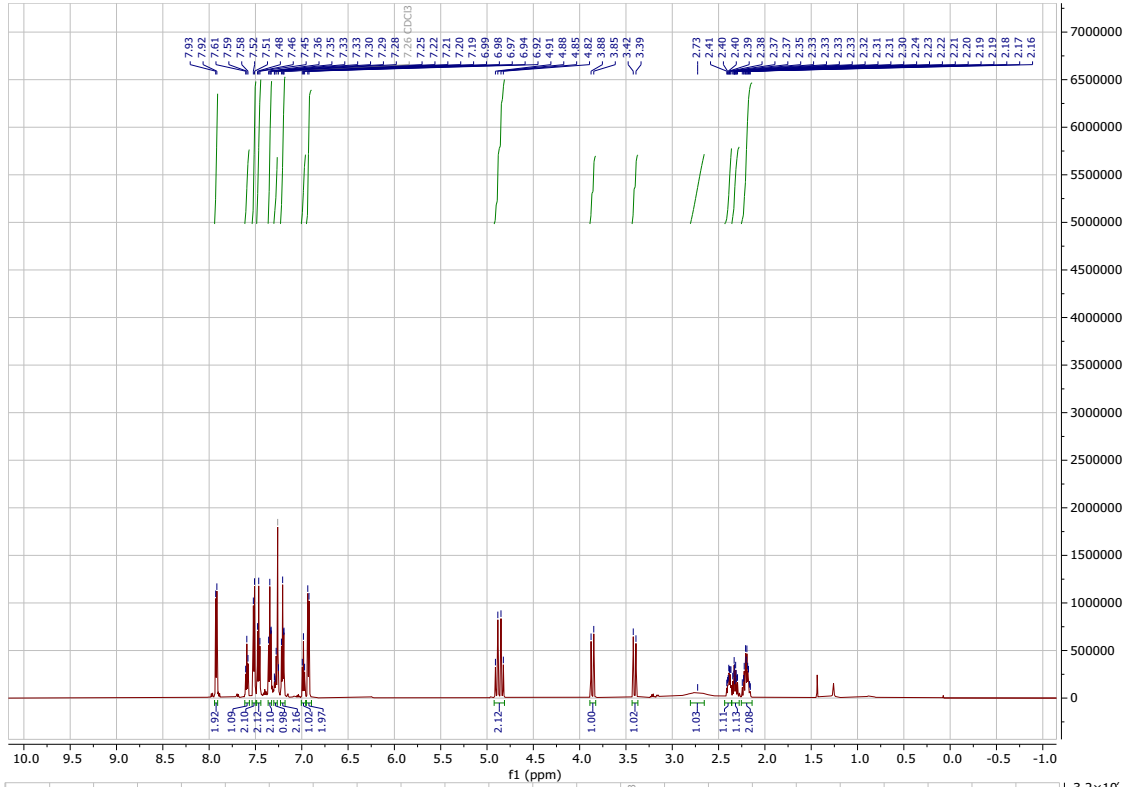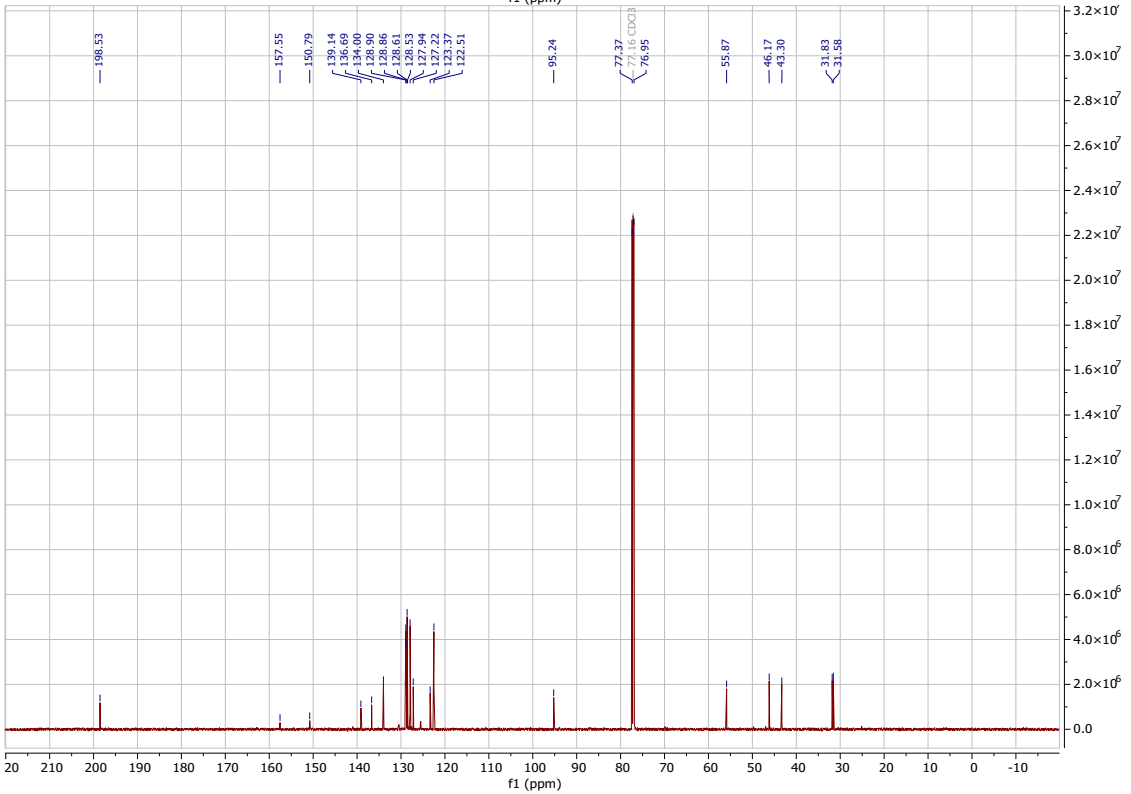

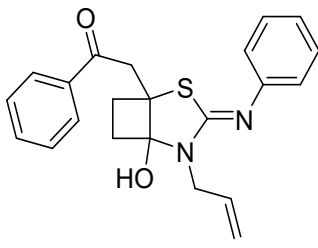

**6c**

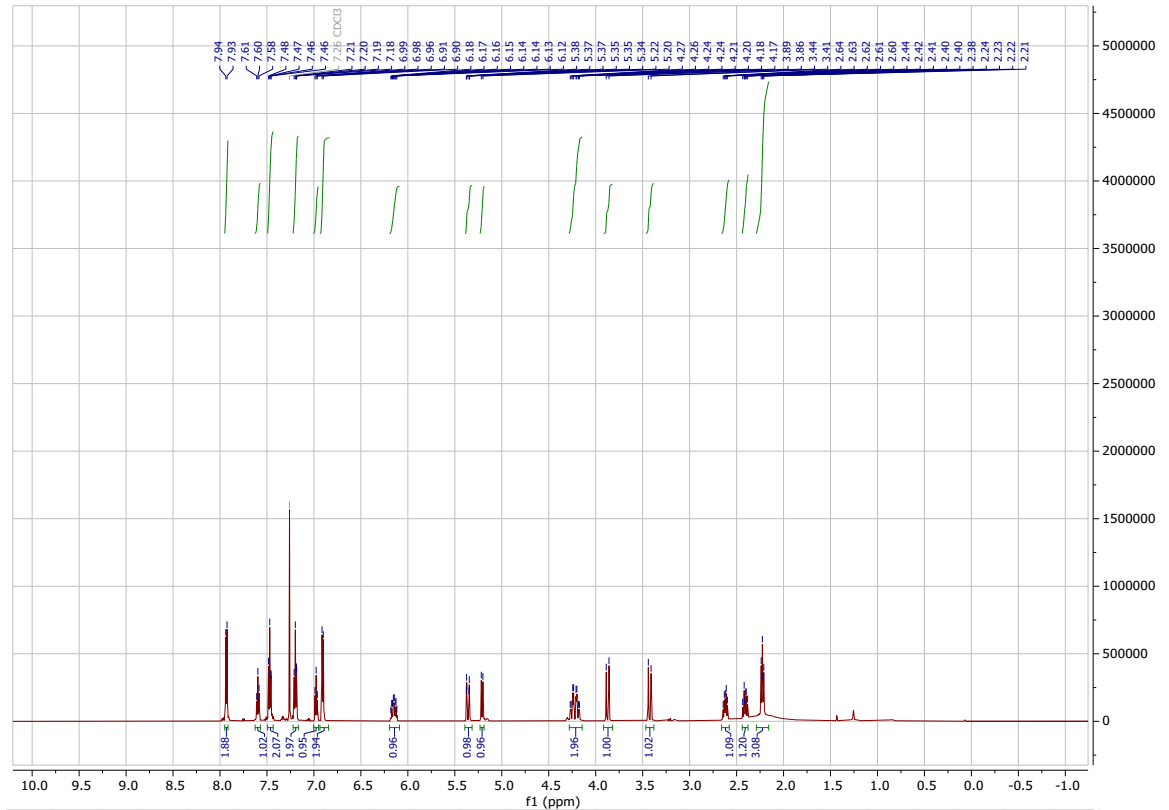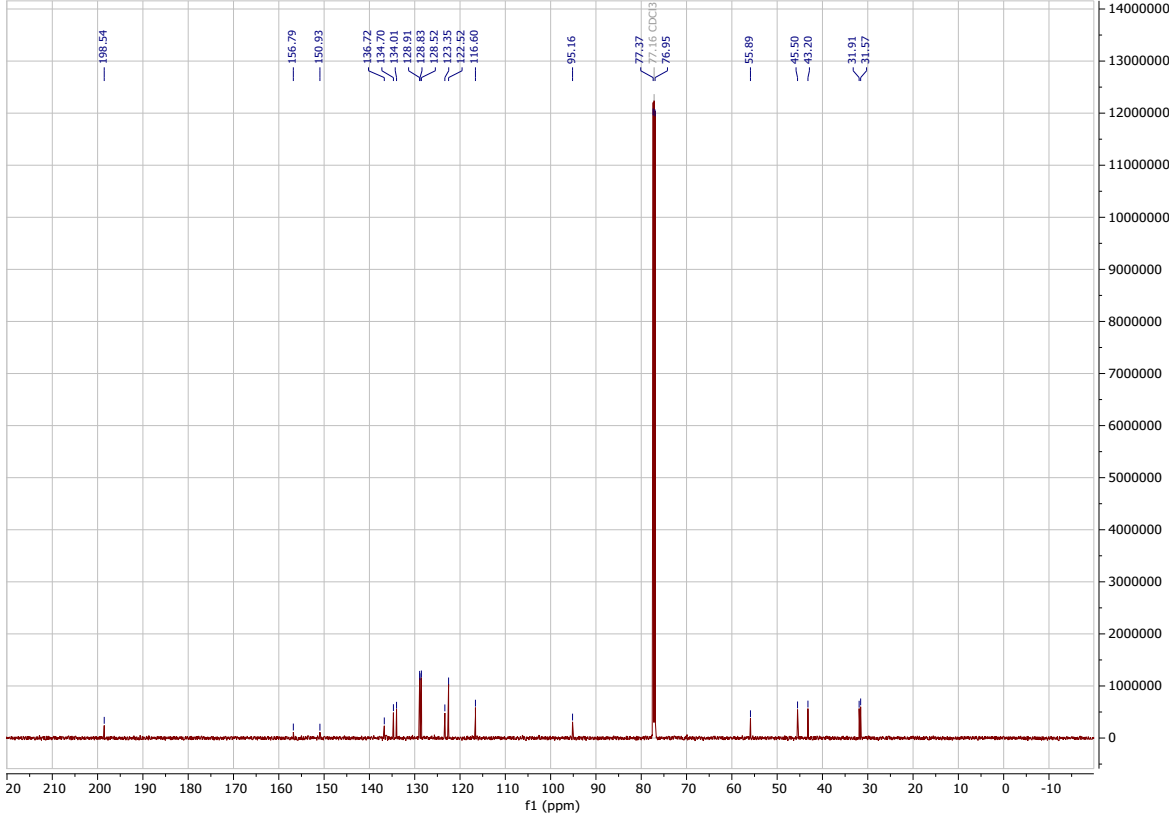

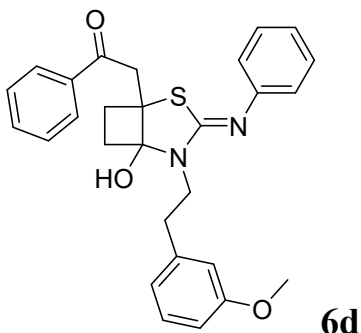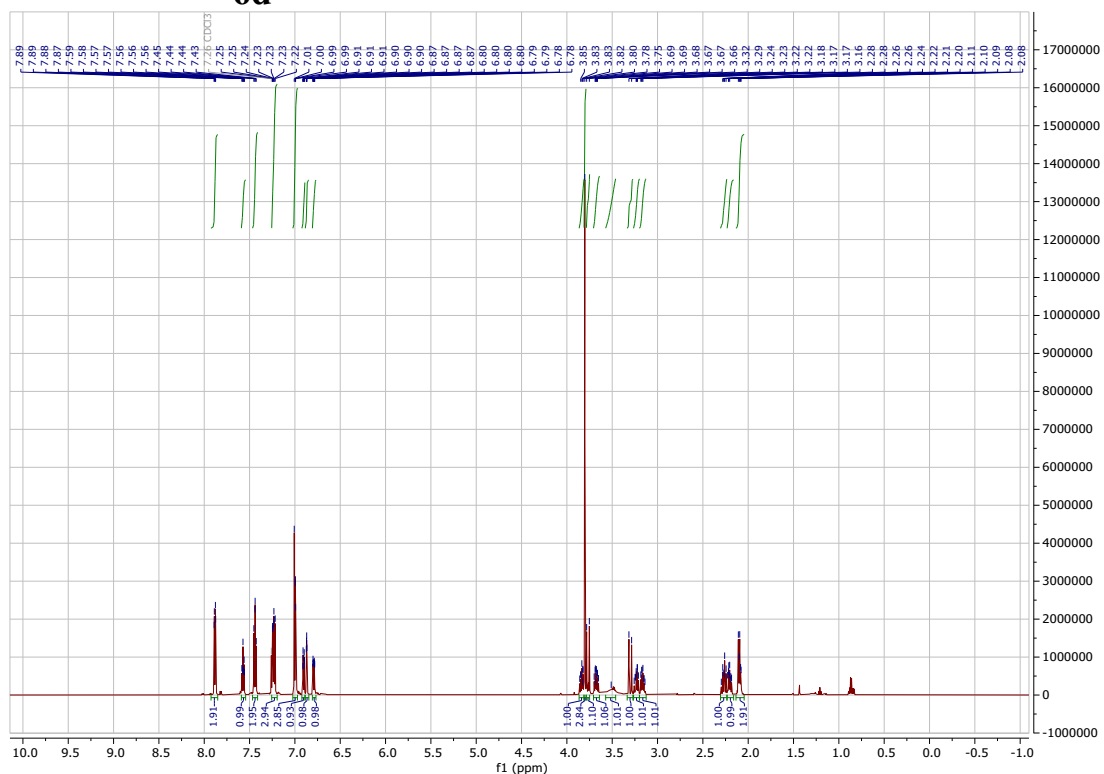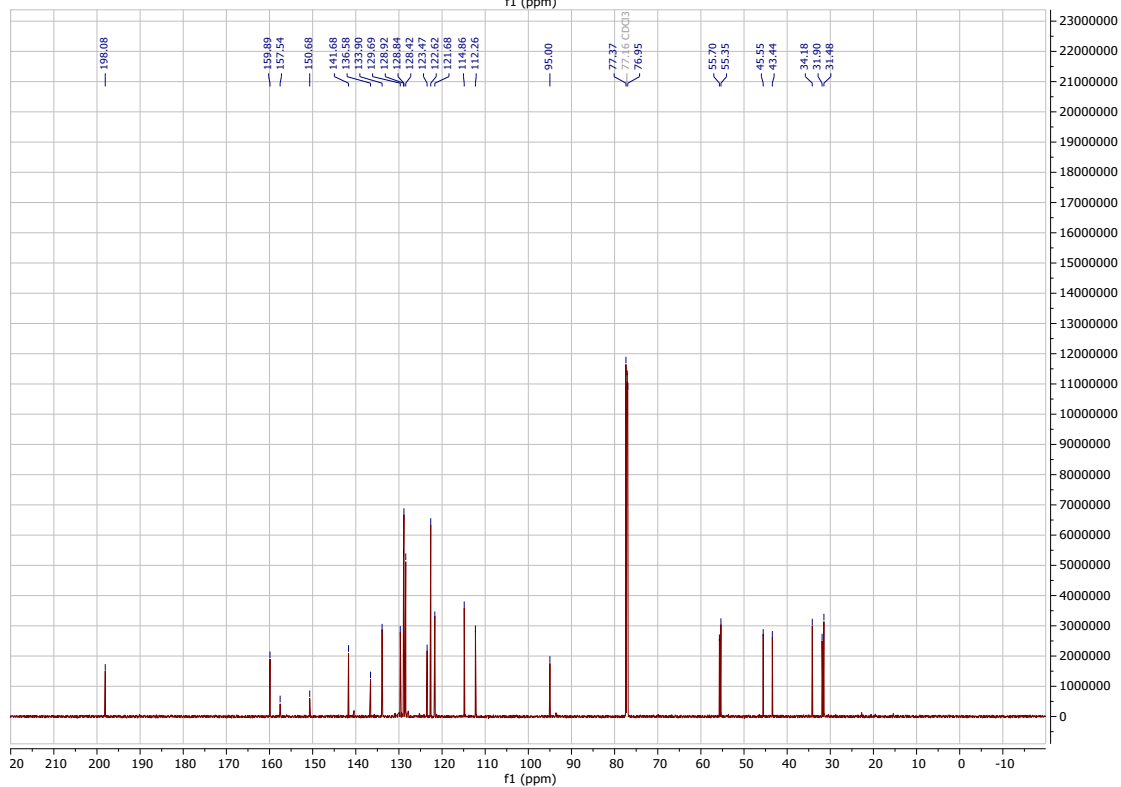

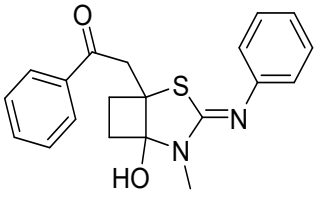

6e

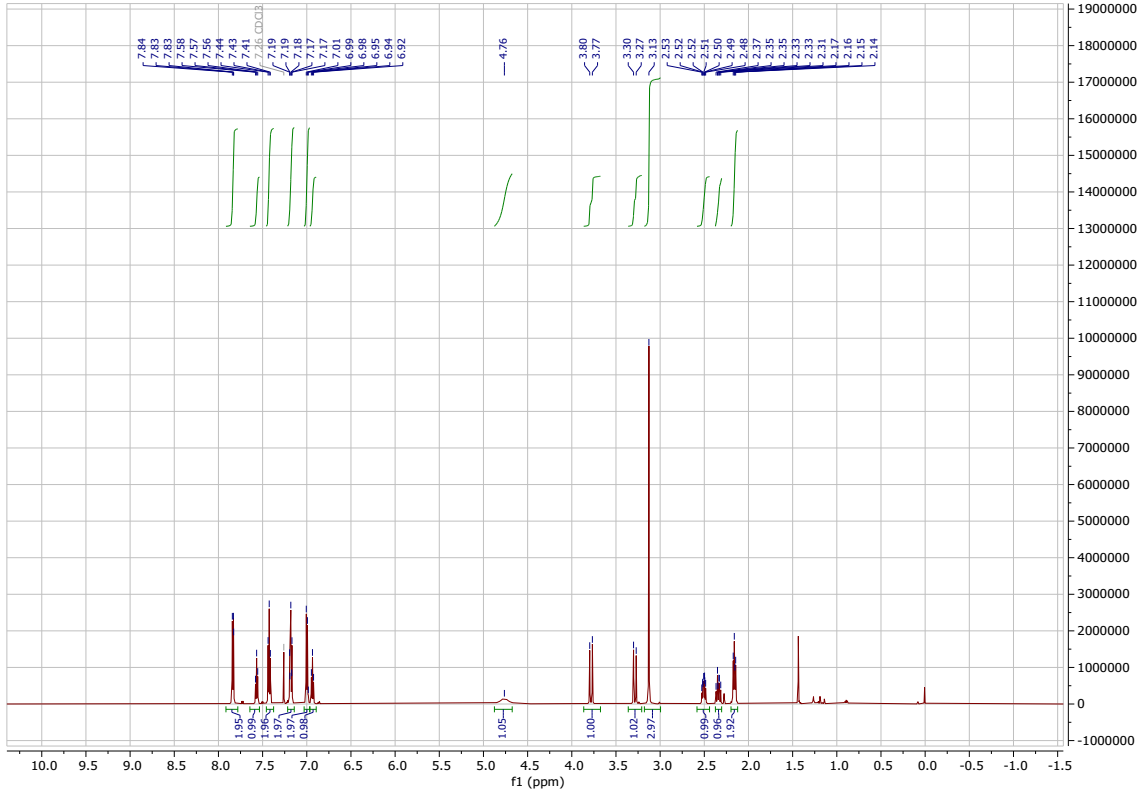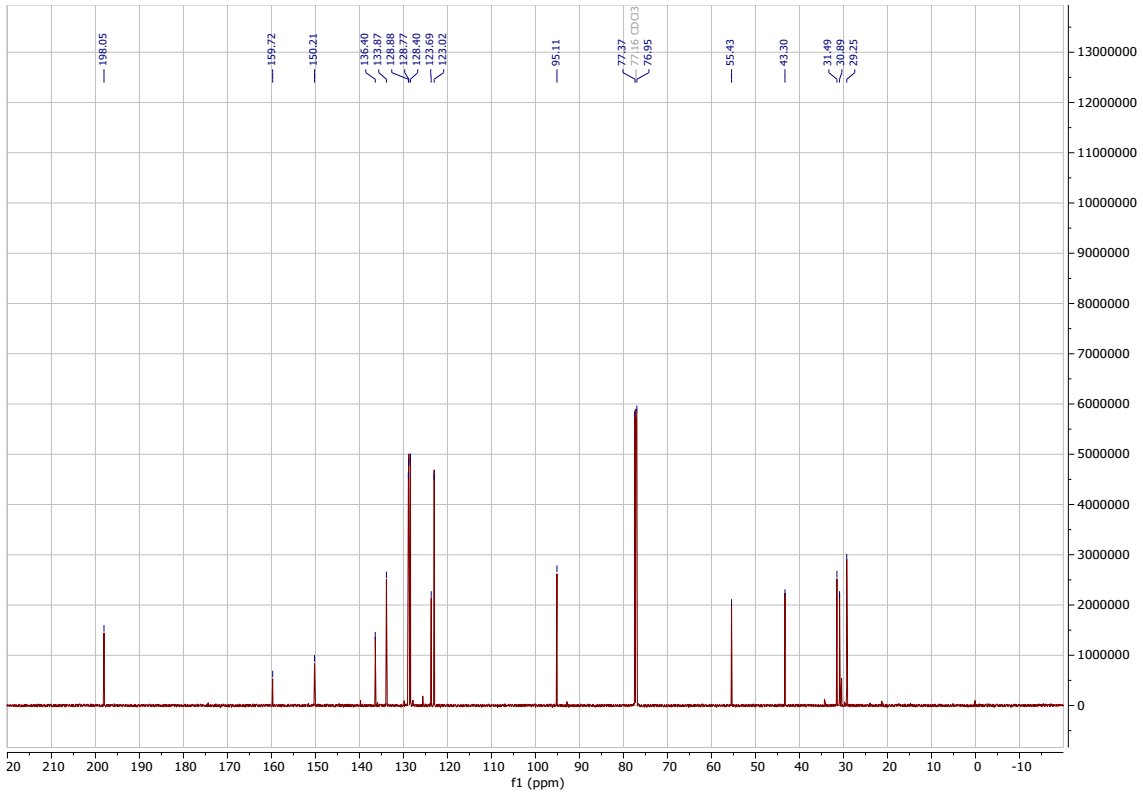

## X-Ray Crystallographic studies

X-ray diffraction data for compounds **5f** & **5o** were collected using a Bruker VENTURE PHOTON III c7 diffractometer with Micro-focus I $\mu$ S source CuK $\alpha$  radiation ( $\lambda = 1.54178 \text{ \AA}$ ). X-ray diffraction data for compounds **5n** & **6e** were collected using a Bruker VENTURE PHOTON III c7 CMOS diffractometer with Micro-focus I $\mu$ S source MoK $\alpha$  radiation ( $\lambda = 0.71073 \text{ \AA}$ ). Crystals were mounted on a CryoLoop (Hampton Research) with Paratone-N (Hampton Research) as cryoprotectant and then placed in a nitrogen gas stream at 200 K (compounds **5n**, **5o** & **6e**) or 100 K (compound **5f**). The temperature of the crystal was maintained at the selected value by means of a 700 series Cryostream cooling device with an accuracy of  $\pm 1$  K. Data reduction was accomplished using SAINT V7.53a. The substantial redundancy in data allowed a semi-empirical absorption correction (SADABS V2.10) to be applied, on the basis of multiple measurements of equivalent reflections. The structures were solved by direct methods using SHELXS-97<sup>1</sup> and refined against  $F^2$  by full-matrix least-squares techniques using SHELXL-2018<sup>2</sup> with anisotropic displacement parameters for all non-hydrogen atoms. All calculations were performed by using the crystallographic software package WINGX.<sup>3</sup>

The crystal data collection and refinement parameters are given in Table S1. The molecular structures are illustrated in Figures S1-S4.

CCDC files 2361608-2361611 contain the supplementary crystallographic data. They can be obtained free of charge from the Cambridge Crystallographic Data Centre and Fachinformationszentrum Karlsruhe via <http://www.ccdc.cam.ac.uk/structures/>.

---

<sup>1</sup> G. M. Sheldrick, SHELXS-97, Program for Crystal Structure Solution, University of Göttingen, Göttingen, Germany, **1997**.

<sup>2</sup> G. M. Sheldrick, *Acta Crystallogr., Sect. A: Found. Crystallogr.*, **2008**, *64*, 112-122.

<sup>3</sup> L. J. Farrugia, *J. Appl. Cryst.* **1999**, *32*, 837.

**Table S1.** Crystallographic data and structure refinement details.

| <b>Compound</b>                                                | <b>5f</b>                                                       | <b>5n</b>                                                                               | <b>5o</b>                                                       | <b>6e</b>                                                       |
|----------------------------------------------------------------|-----------------------------------------------------------------|-----------------------------------------------------------------------------------------|-----------------------------------------------------------------|-----------------------------------------------------------------|
| CCDC                                                           | 2361611                                                         | 2361609                                                                                 | 2361608                                                         | 2361610                                                         |
| Empirical Formula                                              | C <sub>19</sub> H <sub>18</sub> N <sub>2</sub> O <sub>2</sub> S | C <sub>19</sub> H <sub>18</sub> N <sub>2</sub> O <sub>2</sub> S,<br>C H Cl <sub>3</sub> | C <sub>16</sub> H <sub>20</sub> N <sub>2</sub> O <sub>2</sub> S | C <sub>20</sub> H <sub>20</sub> N <sub>2</sub> O <sub>2</sub> S |
| <i>M<sub>r</sub></i>                                           | 338.41                                                          | 457.78                                                                                  | 304.40                                                          | 352.44                                                          |
| Crystal size, mm <sup>3</sup>                                  | 0.10 × 0.06 × 0.04                                              | 0.12 × 0.03 × 0.02                                                                      | 0.15 × 0.13 × 0.04                                              | 0.07 × 0.04 × 0.04                                              |
| Crystal system                                                 | monoclinic                                                      | monoclinic                                                                              | orthorhombic                                                    | triclinic                                                       |
| Space group                                                    | <i>P</i> 2 <sub>1</sub> / <i>c</i>                              | <i>P</i> 2 <sub>1</sub> / <i>c</i>                                                      | <i>P</i> <i>b c a</i>                                           | <i>P</i> $\bar{1}$                                              |
| <i>a</i> , Å                                                   | 14.3538(2)                                                      | 11.0280(14)                                                                             | 11.5953(2)                                                      | 11.754(3)                                                       |
| <i>b</i> , Å                                                   | 29.2862(4)                                                      | 18.344(2)                                                                               | 11.3000(2)                                                      | 11.915(3)                                                       |
| <i>c</i> , Å                                                   | 7.77910(10)                                                     | 11.1908(13)                                                                             | 24.7099(4)                                                      | 15.389(4)                                                       |
| $\alpha$ , °                                                   | 90                                                              | 90                                                                                      | 90                                                              | 99.849(8)                                                       |
| $\beta$ , °                                                    | 94.1680(10)                                                     | 108.215(4)                                                                              | 90                                                              | 101.129(8)                                                      |
| $\gamma$ , °                                                   | 90                                                              | 90                                                                                      | 90                                                              | 117.442(8)                                                      |
| Cell volume, Å <sup>3</sup>                                    | 3261.44(8)                                                      | 2150.4(5)                                                                               | 3237.66(10)                                                     | 1791.1(7)                                                       |
| <i>Z</i> ; <i>Z'</i>                                           | 8 ; 2                                                           | 4 ; 1                                                                                   | 8 ; 1                                                           | 4 ; 2                                                           |
| T, K                                                           | 100(1)                                                          | 200(1)                                                                                  | 200(1)                                                          | 200(1)                                                          |
| Radiation type ; wavelength Å                                  | CuK $\alpha$ ; 1.54178                                          | MoK $\alpha$ ; 0.71073                                                                  | CuK $\alpha$ ; 1.54178                                          | MoK $\alpha$ ; 0.71073                                          |
| <i>F</i> <sub>000</sub>                                        | 1424                                                            | 944                                                                                     | 1296                                                            | 744                                                             |
| $\mu$ , mm <sup>-1</sup>                                       | 1.875                                                           | 0.542                                                                                   | 1.822                                                           | 0.196                                                           |
| range, °                                                       | 4.319 - 65.197                                                  | 2.214 - 31.060                                                                          | 5.231 - 65.076                                                  | 2.014 - 31.039                                                  |
| Reflection collected                                           | 54 989                                                          | 86 872                                                                                  | 23 306                                                          | 137 955                                                         |
| Reflections unique                                             | 5 541                                                           | 6 870                                                                                   | 2 731                                                           | 11 402                                                          |
| <i>R</i> <sub>int</sub>                                        | 0.0671                                                          | 0.0928                                                                                  | 0.0389                                                          | 0.1082                                                          |
| GOF                                                            | 1.283                                                           | 1.031                                                                                   | 1.040                                                           | 1.028                                                           |
| Refl. obs. ( <i>I</i> > 2( <i>I</i> ))                         | 5 283                                                           | 4 277                                                                                   | 2 453                                                           | 7 095                                                           |
| Parameters ; restraints                                        | 425 ; 0                                                         | 291 ; 0                                                                                 | 197 ; 0                                                         | 455 ; 0                                                         |
| w <i>R</i> <sub>2</sub> (all data)                             | 0.1649                                                          | 0.1618                                                                                  | 0.0859                                                          | 0.1402                                                          |
| <i>R</i> value ( <i>I</i> > 2( <i>I</i> ))                     | 0.0766                                                          | 0.0562                                                                                  | 0.0324                                                          | 0.0495                                                          |
| Largest diff. peak and hole (e <sup>-</sup> ·Å <sup>-3</sup> ) | 0.704 ; -0.890                                                  | 0.661 ; -0.530                                                                          | 0.225 ; -0.198                                                  | 0.351 ; -0.257                                                  |



**X-ray structure drawings**

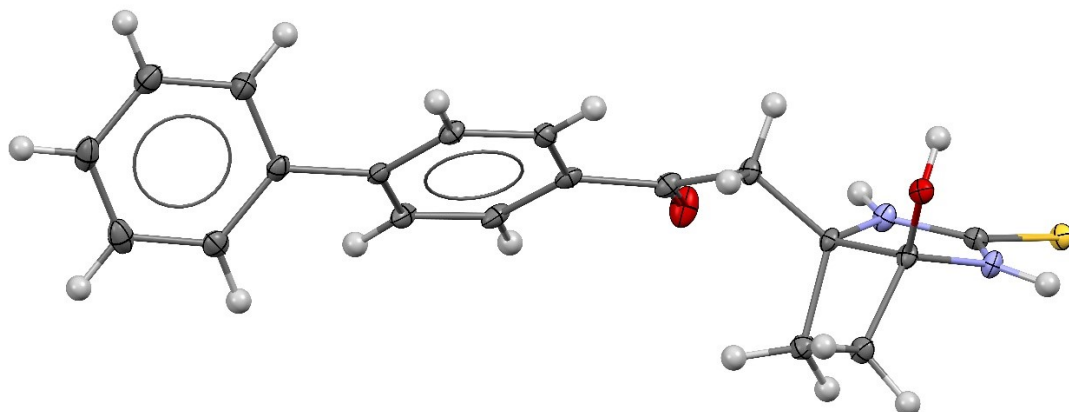

**Figure S1.** An ORTEP drawing of compound **5f**. Thermal ellipsoids are shown at the 30% level. Only one of the two similar molecules in the asymmetric unit is shown.

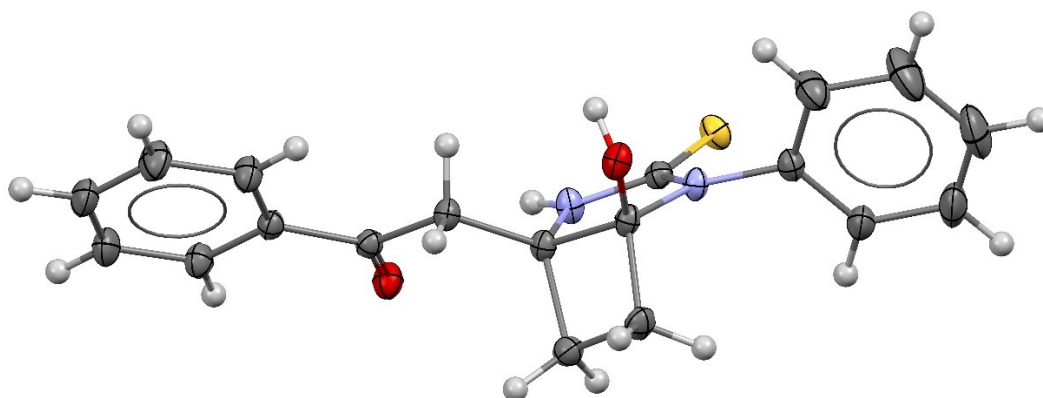

**Figure S2.** An ORTEP drawing of compound **5n**. Thermal ellipsoids are shown at the 30% level. A solvent molecule is omitted for clarity.

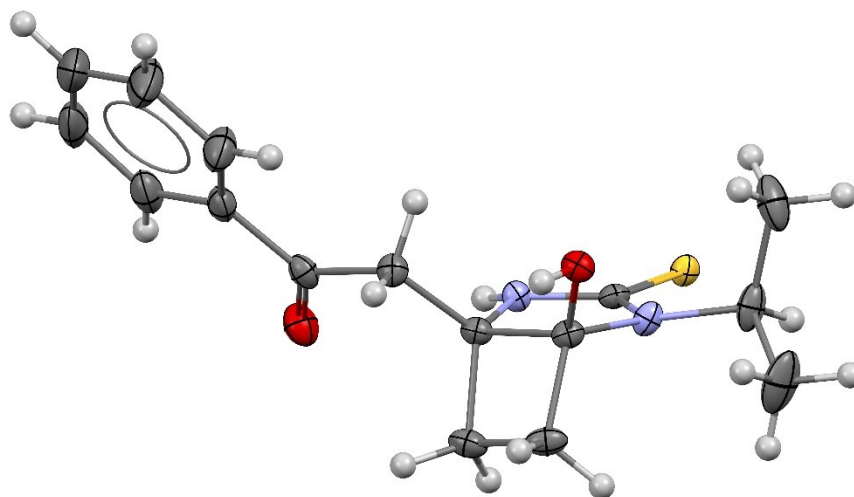

**Fig. S3.** An ORTEP drawing of compound **5o**. Thermal ellipsoids are shown at the 30% level.

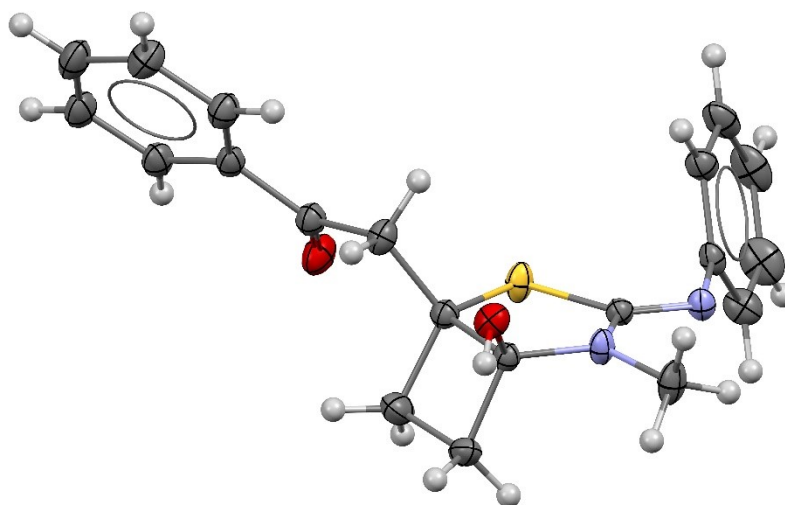

**Figure S4.** An ORTEP drawing of compound **6e**. Thermal ellipsoids are shown at the 30% level.  
Only one of the two similar molecules in the asymmetric unit is shown.
